# Supplementary material
Source: PubMed Central journal article supplement (PMC6108189)

## Supporting Information

### Enantioselective Synthesis of Oseltamivir Phosphate (Tamiflu) via the Iron-Catalyzed Stereoselective Olefin Diazidation

Hongze Li,<sup>‡</sup> Shou-Jie Shen,<sup>‡</sup> Cheng-Liang Zhu, and Hao Xu\*

[hxu@gsu.edu](mailto:hxu@gsu.edu)

*Department of Chemistry, Georgia State University, 100 Piedmont Avenue SE, Atlanta, GA 30303, USA*

#### A. General Information

#### B. Summary of the Synthetic Scheme

#### C. Enantioselective Synthesis of Functionalized Cyclic Allylic Alcohols for the Iron-Catalyzed Stereoselective Diazidation

#### D. Iron-Catalyzed Stereoselective Diazidation of Highly Functionalized Substrates for the Synthesis of 3·2TsOH

#### E. Safety Assessment of the Olefin Diazidation Product Using Differential Scanning Calorimetry (DSC) and Drop Weight Test (DWT)

#### F. Substrate Structure–Diazidation Stereoselectivity Relationship Studies

#### G. Catalyst Structure–Reactivity Relationship Studies

#### H. Expedient Tamiflu Synthesis from 3·2TsOH and Related Synthetic Explorations

#### I. References

#### J. NMR Spectra

## A. General Information

**General Procedures.** All reactions were performed in oven-dried or flame-dried round-bottom flasks and vials. Stainless steel syringes and cannula were used to transfer air- and moisture-sensitive liquids. Flash chromatography was performed using silica gel 60 (230–400 mesh) from Sigma–Aldrich.

**Materials.** Commercial reagents were purchased from Sigma–Aldrich, Fluka, EM Science, and Lancaster and used as received. All solvents were used after being freshly distilled unless otherwise noted.

**Instrumentation.** Proton nuclear magnetic resonance ( $^1\text{H}$  NMR) spectra and carbon nuclear magnetic resonance ( $^{13}\text{C}$  NMR) spectra were recorded on Bruker UltraShield–400 (400 MHz). Chemical shifts for protons are reported in parts per million downfield from tetramethylsilane and are referenced to the NMR solvent residual peak ( $\text{CHCl}_3$   $\delta$  7.26). Chemical shifts for carbons are reported in parts per million downfield from tetramethylsilane and are referenced to the carbon resonances of the NMR solvent ( $\text{CDCl}_3$   $\delta$  77.0). Data are represented as follows: chemical shift, multiplicity (br = broad, s = singlet, d = doublet, t = triplet, q = quartet, quint = quintet, m = multiplet), coupling constants in Hertz (Hz), and integration. The mass spectroscopic data were obtained at the Georgia State University mass spectrometry facility using a Micromass Platform II single quadrupole instrument. Infrared (IR) spectra were obtained using a Perkin Elmer Spectrum 100 FT-IR spectrometer. Data are represented as follows: frequency of absorption ( $\text{cm}^{-1}$ ) and absorption strength (s = strong, m = medium, w = weak).

**Abbreviations Used:** THF–tetrahydrofuran, EtOAc–ethyl acetate, EtOH–ethanol,  $\text{Et}_2\text{O}$ –diethyl ether,  $\text{CH}_2\text{Cl}_2$ –dichloromethane, MeCN–acetonitrile,  $\text{TMSN}_3$ –trimethylsilyl azide, TEA–triethylamine, TFA–trifluoroacetic acid, TLC–thin layer chromatography,  $\text{Boc}_2\text{O}$ –di-*tert*-butyl dicarbonate, DMAP–4-dimethylaminopyridine, MsOH–methanesulfonic acid, TfOH–trifluoromethanesulfonic acid,  $\text{Ph}_3\text{P}$ –triphenylphosphine,  $\text{TsOH}\cdot\text{H}_2\text{O}$ –*p*-toluenesulfonic acid monohydrate.

## B. Summary of the Overall Synthetic Scheme

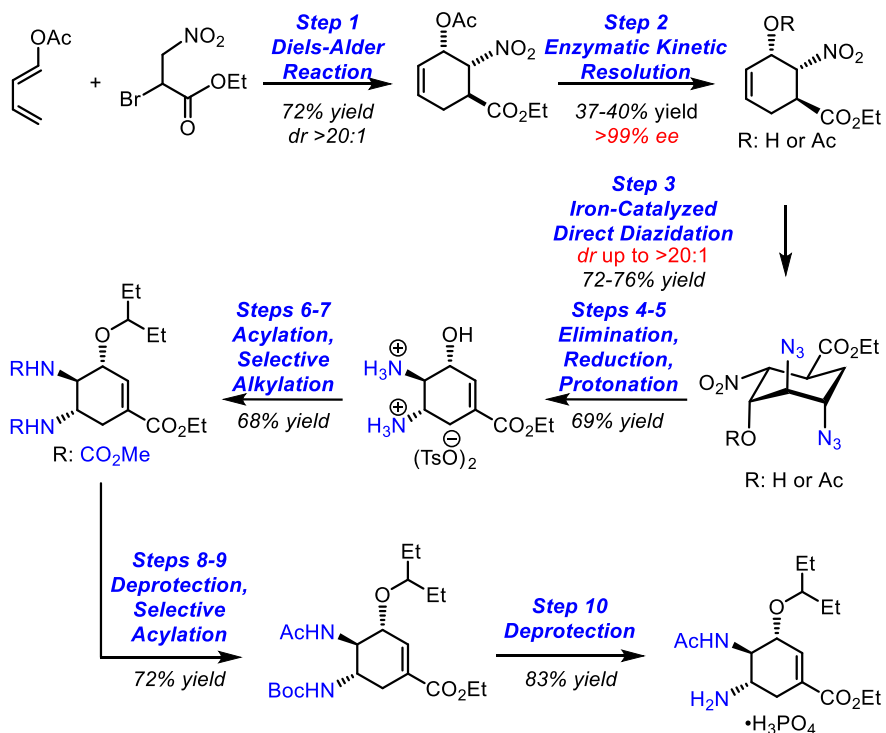

### C. Enantioselective Synthesis of Highly Cyclic Allylic Alcohols for the Iron-Catalyzed Stereoselective Diazidation

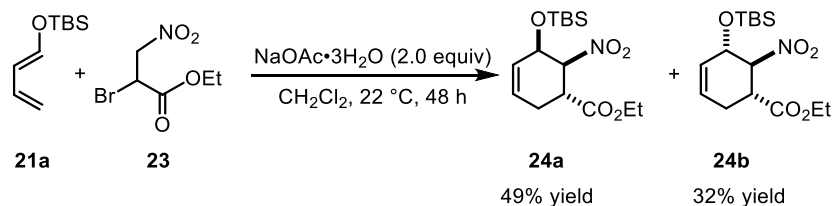

(*E*)-(Buta-1,3-dien-1-yloxy)(*tert*-butyl)dimethylsilane **21a** and ethyl 2-bromo-3-nitropropanoate **23** are prepared with known literature procedures.<sup>1,2</sup>

To an oven-dried 25 mL round bottom flask equipped with a stir bar was added finely ground NaOAc·3H<sub>2</sub>O (1.81 g, 13.3 mmol, 2.0 equiv). The flask was evacuated and backfilled with N<sub>2</sub>. Subsequently, anhydrous CH<sub>2</sub>Cl<sub>2</sub> (10 mL), (*E*)-(buta-1,3-dien-1-yloxy)(*tert*-butyl)dimethylsilane **21a** (1.84 g, 10.0 mmol, 1.5 equiv) and ethyl 2-bromo-3-nitropropanoate **23** (1.5 g, 6.6 mmol, 1.0 equiv) were added. The reaction mixture was stirred at room temperature for 48 h until **23** was fully consumed (monitored by TLC). The reaction mixture was filtered and the solid was washed with CH<sub>2</sub>Cl<sub>2</sub> (15 mL). The combined CH<sub>2</sub>Cl<sub>2</sub> filtrate was washed with brine (15 mL) and dried over Na<sub>2</sub>SO<sub>4</sub>. After concentration *in vacuo*, the residue was purified through column chromatography (hexanes/EtOAc: from 100:1 to 10:1) to afford the **24a** as colorless oil (1.07 g, 49% yield) along with **24b** as colorless oil (0.7 g, 32% yield).

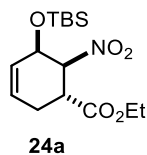

(±)-Ethyl (1*R*,5*R*,6*S*)-5-((*tert*-butyl)dimethylsilyloxy)-6-nitrocyclohex-3-ene-1-carboxylate (**24a**): IR  $\nu_{\text{max}}$  (neat)/cm<sup>-1</sup>: 2958 (w), 2930 (w), 2891 (w), 2858 (w), 1734 (s), 1557 (s), 1473 (w), 1379 (m), 1297 (m), 1256 (s), 1184 (s), 1117 (s), 1086 (s), 1032 (m), 955 (s), 891 (m), 827 (s), 777 (s), 747 (m), 701 (m); <sup>1</sup>H NMR (400 MHz, acetone-*d*<sub>6</sub>)  $\delta$  5.97–5.87 (m, 2H), 4.89 (dd, *J* = 11.8, 4.0 Hz, 1H), 4.82 (t, *J* = 3.9 Hz, 1H), 4.22–4.07 (m, 2H), 3.36 (td, *J* = 11.7, 6.0 Hz, 1H), 2.67 (ddd, *J* = 18.4, 6.0, 4.0 Hz, 1H), 2.27–2.11 (m, 1H), 1.23 (t, *J* = 7.1 Hz, 3H), 0.83 (s, 9H),



0.09 (s, 3H), 0.03 (s, 3H);  $^{13}\text{C}$  NMR (100 MHz, acetone- $d_6$ )  $\delta$  172.7, 128.3, 126.3, 86.0, 65.5, 60.7, 37.3, 28.9, 25.1, 17.6, 13.5, -4.8, -6.2; LRMS (ESI, m/z): calcd for  $\text{C}_{15}\text{H}_{27}\text{NO}_5\text{SiNa}^+$ ,  $[\text{M} + \text{Na}^+]$ , 352.2, found 352.2.

The stereochemistry of **24a** was determined by *NOE* analysis: there is no *NOE* observed between  $\text{H}_a$  and  $\text{H}_c$ .

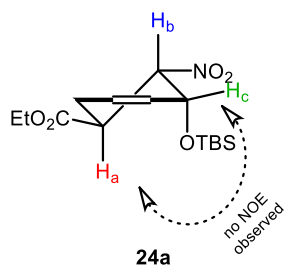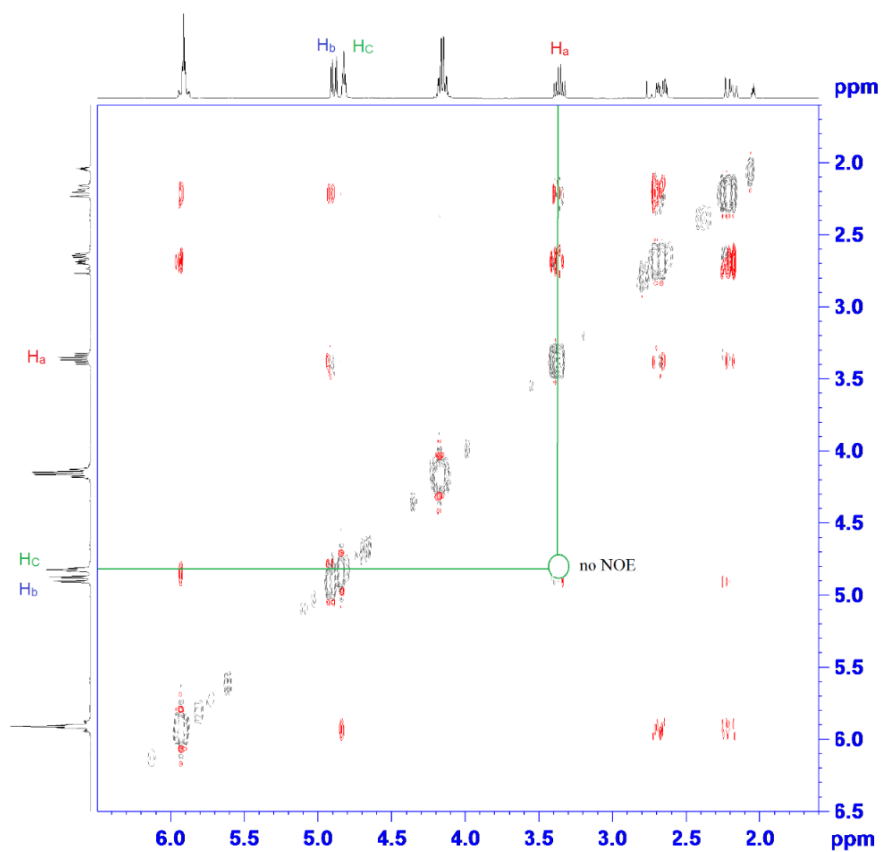

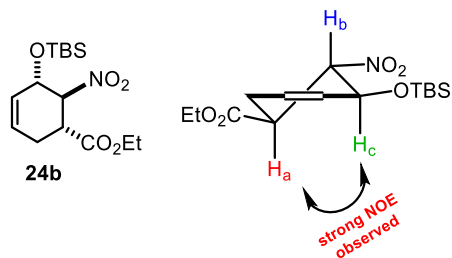

(±)-Ethyl (1*R*,5*S*,6*S*)-5-((*tert*-butyldimethylsilyl)oxy)-6-nitrocyclohex-3-ene-1-carboxylate (**24b**): IR  $\nu_{\max}$  (neat)/ $\text{cm}^{-1}$ : 2959 (w), 2931 (w), 2859 (w), 1737 (s), 1557 (s), 1387 (m), 1264 (s), 1239 (s), 1198 (m), 1101 (s), 1022 (m), 976 (m), 890 (m), 839 (s), 778 (s), 736 (s);  $^1\text{H}$  NMR (400 MHz, acetone- $d_6$ )  $\delta$  5.79 (dtd,  $J = 6.9, 4.6, 2.2$  Hz, 1H), 5.62–5.56 (m, 1H), 4.83–4.77 (m, 1H), 4.66 (dd,  $J = 11.8, 8.6$  Hz, 1H), 4.19–4.04 (m, 2H), 3.37 (td,  $J = 11.6, 6.0$  Hz, 1H), 2.62 (dddd,  $J = 10.7, 6.4, 3.4, 1.6$  Hz, 1H), 2.37 (dddd,  $J = 14.1, 11.4, 5.9, 2.7$  Hz, 1H), 1.19 (t,  $J = 7.1$  Hz, 3H), 0.87 (s, 9H), 0.09 (s, 3H), 0.00 (s, 3H);  $^{13}\text{C}$  NMR (100 MHz, acetone- $d_6$ )  $\delta$  170.5, 128.9, 125.9, 89.6, 71.3, 61.0, 42.4, 28.1, 25.1, 17.6, 13.4, -5.4, -6.2; LRMS (ESI,  $m/z$ ): calcd for  $\text{C}_{15}\text{H}_{27}\text{NO}_5\text{SiNa}^+$ ,  $[\text{M} + \text{Na}^+]$ , 352.2, found 352.2.

The stereochemistry of **24b** was determined by *NOE* analysis: there is a strong *NOE* observed between  $\text{H}_a$  and  $\text{H}_c$ .

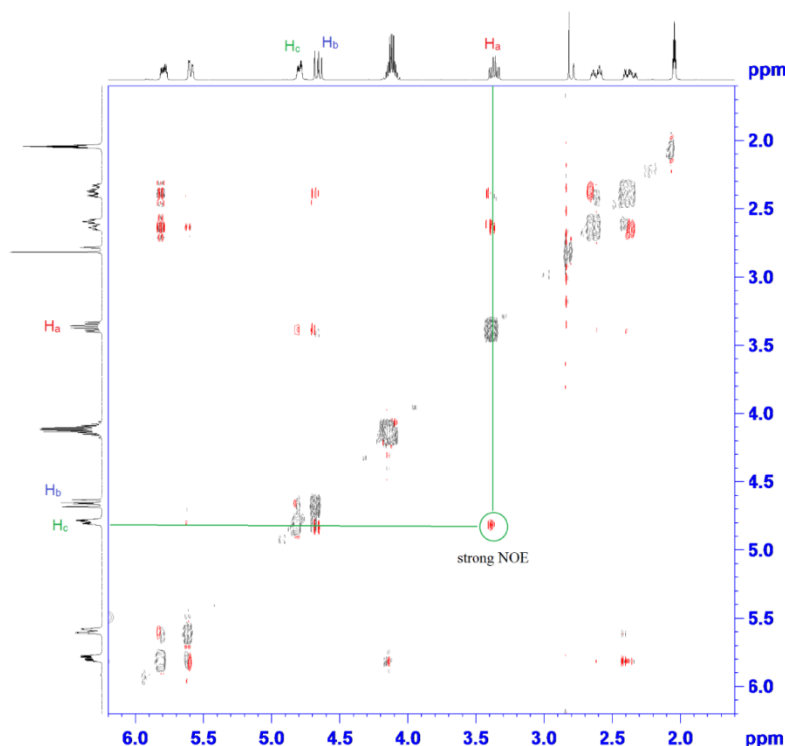

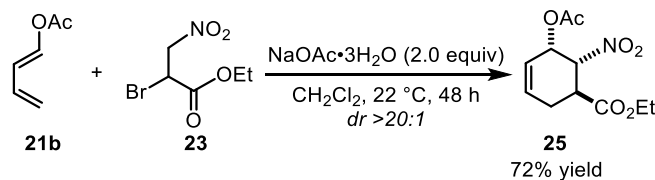

(*E*)-Buta-1,3-dien-1-yl acetate **21b** was prepared through a known literature procedure.<sup>3</sup>

To an oven-dried 500 mL round bottom flask equipped with a stir bar was added finely ground NaOAc·3H<sub>2</sub>O (43.1 g, 316.8 mmol, 2.0 equiv). The flask was evacuated and backfilled with N<sub>2</sub>. Subsequently, anhydrous CH<sub>2</sub>Cl<sub>2</sub> (244 mL), (*E*)-buta-1,3-dien-1-yl acetate **21b** (26.6 g, 237.6 mmol, 1.5 equiv) and ethyl 2-bromo-3-nitropropanoate **23** (35.8 g, 158.4 mmol, 1.0 equiv) were added. The reaction mixture was stirred at room temperature for 48 h until **23** was fully consumed (monitored by TLC). The reaction mixture was filtered and the solid was washed with CH<sub>2</sub>Cl<sub>2</sub> (100 mL). The combined CH<sub>2</sub>Cl<sub>2</sub> filtrate was washed with brine (100 mL) and dried over Na<sub>2</sub>SO<sub>4</sub>. After concentration *in vacuo*, the crude product was recrystallized from ethanol (100 mL) to furnish the desired product **25** (29.3 g, 72%, *dr* >20:1, m.p. 75–76 °C).

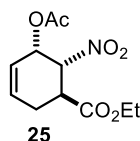

(±)-Ethyl (1*R*,5*R*,6*S*)-5-acetoxy-6-nitrocyclohex-3-ene-1-carboxylate (**25**): IR  $\nu_{\text{max}}$  (neat)/cm<sup>-1</sup>: 2979 (w), 1737 (s), 1559 (s), 1373 (m), 1226 (s), 1186 (s), 1027 (m), 924 (w); <sup>1</sup>H NMR (400 MHz, CDCl<sub>3</sub>)  $\delta$  6.10–5.90 (m, 2H), 5.84–5.68 (m, 1H), 4.93 (dd, *J* = 12.1, 4.2 Hz, 1H), 4.32–4.12 (m, 2H), 3.45 (td, *J* = 11.8, 6.2 Hz, 1H), 2.80–2.66 (m, 1H), 2.33–2.19 (m, 1H), 1.99 (s, 3H), 1.28 (t, *J* = 7.1 Hz, 3H); <sup>13</sup>C NMR (100 MHz, CDCl<sub>3</sub>)  $\delta$  172.4, 169.4, 131.2, 122.6, 83.3, 65.8, 61.6, 38.0, 28.9, 20.6, 14.1; LRMS (ESI, *m/z*): calcd for C<sub>11</sub>H<sub>15</sub>NO<sub>6</sub>Na<sup>+</sup>, [M + Na<sup>+</sup>], 280.1, found 280.1.

The stereochemistry of **25** was determined by *NOE* analysis: there is no *NOE* observed between H<sub>a</sub> and H<sub>c</sub>.

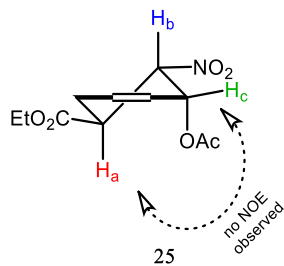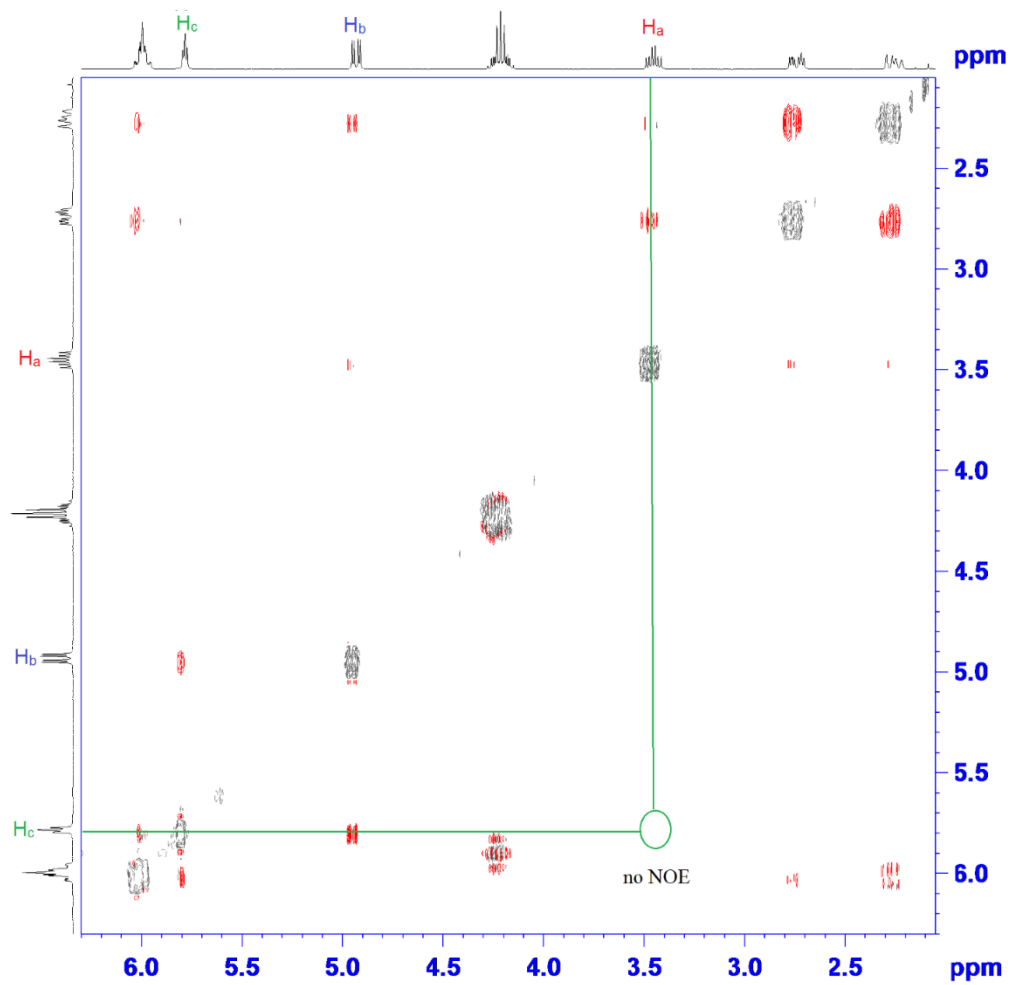



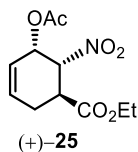

**Ethyl (1*S*,5*S*,6*R*)-5-acetoxy-6-nitrocyclohex-3-ene-1-carboxylate ((+)-**25**):**  $[\alpha]_{\text{D}}^{20} = +363.1^{\circ}$  (*c* 1.18, CHCl<sub>3</sub>).

Note: (+)-**25** is unstable under the HPLC separation conditions; therefore, *ee* analysis was carried out after an additional step of acid hydrolysis.

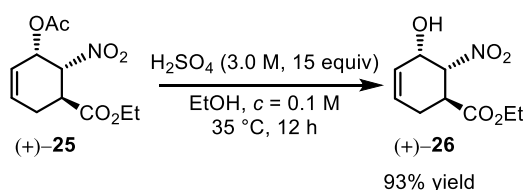

To a 100 mL round bottom flask were added (+)-**25** (2.0 g, 7.8 mmol, 1.0 equiv), EtOH (39 mL) and H<sub>2</sub>SO<sub>4</sub> (39 mL, 3.0 M, 116.7 mmol, 15 equiv). The mixture was stirred at 35 °C for 12 h. EtOAc (50 mL) was added to dilute the reaction. The organic phase was separated from the aqueous phase and the aqueous phase was further extracted with EtOAc (30 mL×3). The combined organic phase was washed with brine (50 mL) and dried over Na<sub>2</sub>SO<sub>4</sub>. After concentration *in vacuo*, the residue was purified through column chromatography (hexanes/EtOAc: from 50:1 to 2:1) to afford the hydrolyzed product (+)-**26** as colorless oil (1.56 g, 93% yield).

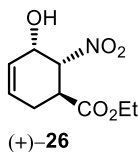

**Ethyl (1*S*,5*S*,6*R*)-5-hydroxy-6-nitrocyclohex-3-ene-1-carboxylate ((+)-**26**):**  $[\alpha]_{\text{D}}^{20} = +294.5^{\circ}$  (*c* 1.03, CHCl<sub>3</sub>).

The *ee* of compounds (–)-**26** and (+)-**26** were determined by Chiral HPLC analysis (Chiral AD-H column, 10% isopropanol in hexanes, flow rate = 1.0 mL/min, UV detection at 210 nm). *t*<sub>r</sub>

(compound (-)-**26**) = 13.4 min, >99% ee; t<sub>r</sub> (compound (+)-**26**) = 17.6 min, 98% ee or >99% ee (after recrystallization).

**Racemic sample (±)-**26****

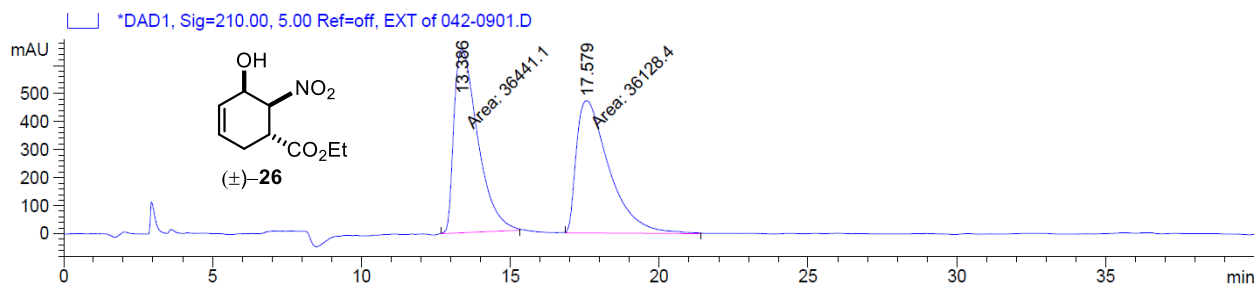

Signal 3: DAD1, Sig=210.00, 5.00 Ref=off, EXT  
Signal has been modified after loading from rawdata file!

| Peak #   | RetTime [min] | Type | Width [min] | Area [mAU*s] | Height [mAU] | Area %  |
|----------|---------------|------|-------------|--------------|--------------|---------|
| 1        | 13.386        | MM   | 0.9294      | 3.64411e4    | 653.47168    | 50.2154 |
| 2        | 17.579        | MM   | 1.2739      | 3.61284e4    | 472.65869    | 49.7846 |
| Totals : |               |      |             | 7.25695e4    | 1126.13037   |         |

**Enantio-enriched sample (-)-**26** (>99% ee)**

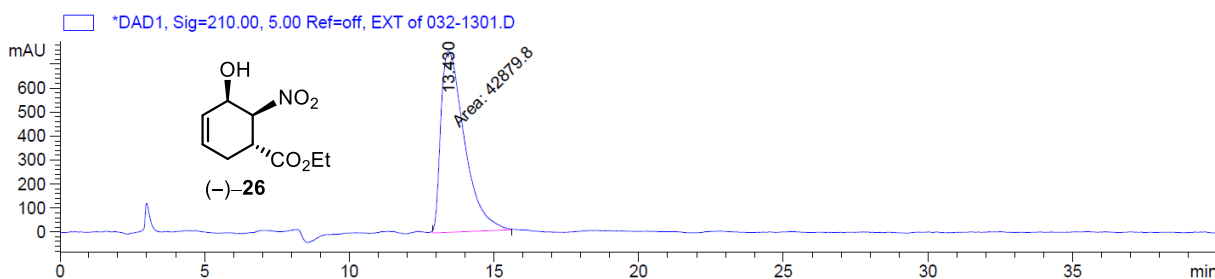

Signal 3: DAD1, Sig=210.00, 5.00 Ref=off, EXT  
Signal has been modified after loading from rawdata file!

| Peak # | RetTime [min] | Type | Width [min] | Area [mAU*s] | Height [mAU] | Area %   |
|--------|---------------|------|-------------|--------------|--------------|----------|
| 1      | 13.430        | MM   | 0.9431      | 4.28798e4    | 757.81018    | 100.0000 |

Totals : 4.28798e4 757.81018

**Enantio-enriched sample (+)-26** (98% ee): hydrolysis product of (+)-25 (98% ee) that is directly obtained after the kinetic resolution.

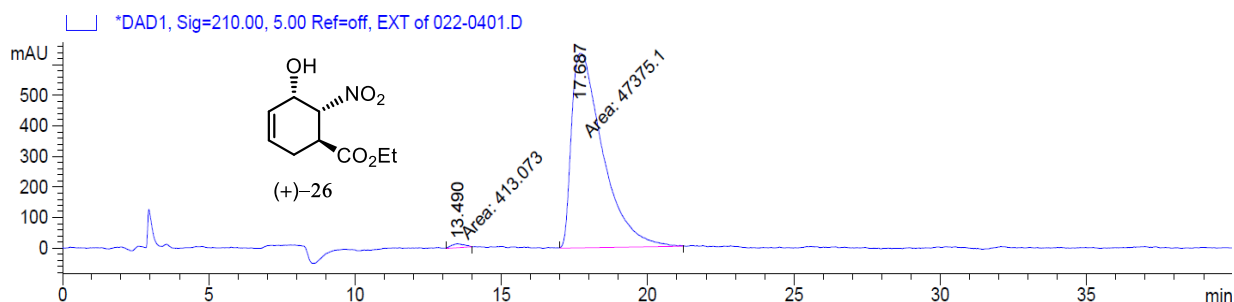

Signal 3: DAD1, Sig=210.00, 5.00 Ref=off, EXT  
Signal has been modified after loading from rawdata file!

| Peak # | RetTime [min] | Type | Width [min] | Area [mAU*s] | Height [mAU] | Area %  |
|--------|---------------|------|-------------|--------------|--------------|---------|
| 1      | 13.490        | MM   | 0.5214      | 413.07303    | 13.20412     | 0.8644  |
| 2      | 17.687        | MM   | 1.2403      | 4.73751e4    | 636.60693    | 99.1356 |

Totals : 4.77881e4 649.81106

**Enantio-enriched sample (+)-26** (>99% ee): hydrolysis product of (+)-25 (>99% ee) that is obtained after the recrystallization following the kinetic resolution.



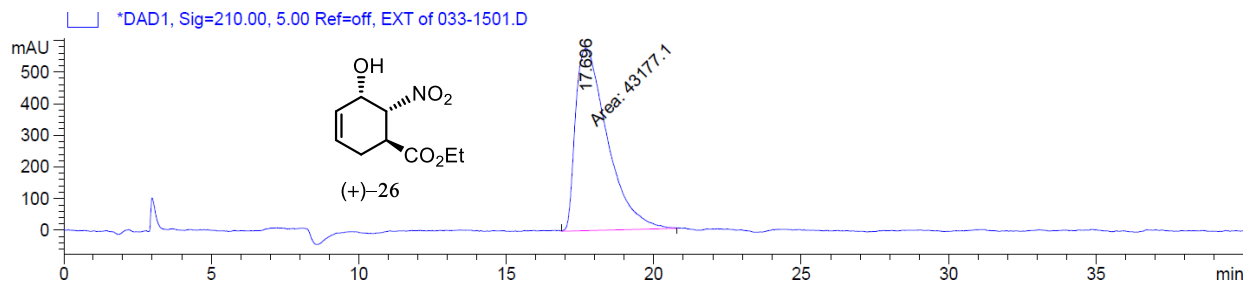

Signal 3: DAD1, Sig=210.00, 5.00 Ref=off, EXT  
Signal has been modified after loading from rawdata file!

| Peak # | RetTime [min] | Type | Width [min] | Area [mAU*s] | Height [mAU] | Area %   |
|--------|---------------|------|-------------|--------------|--------------|----------|
| 1      | 17.696        | MM   | 1.2481      | 4.31771e4    | 576.56738    | 100.0000 |

Totals : 4.31771e4 576.56738

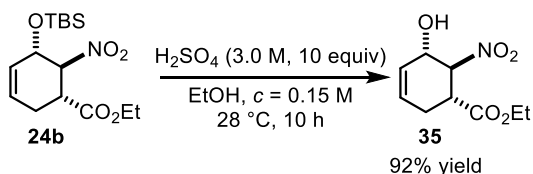

To a 50 mL round bottom flask were added **24b** (659 mg, 2.0 mmol, 1.0 equiv) and EtOH (6.7 mL), then aqueous H<sub>2</sub>SO<sub>4</sub> solution (6.7 mL, 3.0 M, 20.0 mmol, 10 equiv) was added. The mixture was stirred at 28 °C for 10 h. EtOAc (15 mL) was added to dilute the reaction. The organic phase was separated from the aqueous phase and the aqueous phase was further extracted with EtOAc (10 mL×3). The combined organic phase was washed with brine (20 mL) and dried over Na<sub>2</sub>SO<sub>4</sub>. After concentration *in vacuo*, the residue was purified through column chromatography (hexanes/EtOAc: from 50:1 to 3:1) to afford the hydrolyzed product **35** as colorless oil (396 mg, 92% yield).

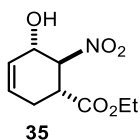

(±)-Ethyl (1*R*,5*S*,6*S*)-5-hydroxy-6-nitrocyclohex-3-ene-1-carboxylate (**35**): IR  $\nu_{\max}$  (neat)/ $\text{cm}^{-1}$ : 3456 (br), 1723 (s), 1550 (s), 1373 (m), 1297 (m), 1240 (s), 1186 (s), 1018 (s), 959 (m), 722 (m), 678 (s);  $^1\text{H}$  NMR (400 MHz,  $\text{CDCl}_3$ )  $\delta$  5.79 (dtd,  $J = 6.9, 4.5, 2.1$  Hz, 1H), 5.66 (ddd,  $J = 10.0, 3.4, 2.2$  Hz, 1H), 4.72 (dd,  $J = 11.4, 8.5$  Hz, 1H), 4.69–4.60 (m, 1H), 4.14 (q,  $J = 7.1$  Hz, 2H), 3.29 (td,  $J = 11.3, 6.0$  Hz, 1H), 3.17 (d,  $J = 6.0$  Hz, 1H), 2.59 (dddd,  $J = 12.3, 6.3, 3.0, 1.4$  Hz, 1H), 2.32 (dddd,  $J = 17.3, 11.2, 5.8, 2.8$  Hz, 1H), 1.22 (t,  $J = 7.1$  Hz, 3H);  $^{13}\text{C}$  NMR (100 MHz,  $\text{CDCl}_3$ )  $\delta$  171.1, 128.0, 126.4, 89.0, 69.9, 61.7, 42.0, 28.0, 13.8; LRMS (ESI,  $m/z$ ): calcd for  $\text{C}_9\text{H}_{13}\text{NO}_5\text{Na}^+$ ,  $[\text{M} + \text{Na}^+]$ , 238.1, found 238.1.

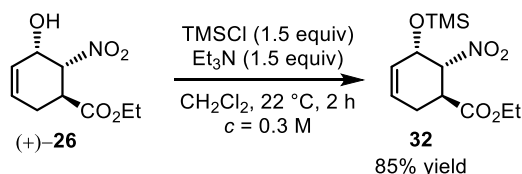

To a flame-dried 50 mL round bottom flask was added (+)-**26** (861 mg, 4.0 mmol, 1.0 equiv). After the flask was evacuated and backfilled with  $\text{N}_2$  twice, anhydrous  $\text{CH}_2\text{Cl}_2$  (13 mL) was added via a syringe and the mixture was cooled down to  $0\text{ }^\circ\text{C}$ . Subsequently, Trimethylsilyl chloride (0.76 mL, 6.0 mmol, 1.5 equiv) was added to the flask followed by  $\text{Et}_3\text{N}$  (0.83 mL, 6.0 mmol, 1.5 equiv). The reaction mixture was stirred at  $22\text{ }^\circ\text{C}$  for 2 h until (+)-**26** was fully consumed (monitored by TLC). Saturated aqueous  $\text{NH}_4\text{Cl}$  solution (5 mL) was added to quench the reaction. The organic phase was separated from aqueous phase and the aqueous phase was further extracted with  $\text{CH}_2\text{Cl}_2$  (10 mL $\times$ 3). The combined organic phase was washed with brine (20 mL) and dried over  $\text{Na}_2\text{SO}_4$ . After concentration *in vacuo*, the residue was purified through column chromatography (hexanes/ $\text{EtOAc}$ : from 100:1 to 10:1) to afford the desired product **32** as colorless oil (977 mg, 85% yield).

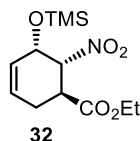

Ethyl (1*S*,5*S*,6*R*)-6-nitro-5-((trimethylsilyl)oxy)cyclohex-3-ene-1-carboxylate (**32**):  $[\alpha]_{\text{D}}^{20} = +298.3^\circ$  ( $c$  1.03,  $\text{CHCl}_3$ ). IR  $\nu_{\max}$  (neat)/ $\text{cm}^{-1}$ : 2961 (w), 2113 (w), 1732 (s), 1556 (s), 1380 (s),

1298 (m), 1253 (s), 1184 (s), 1085 (s), 954 (s), 841 (s), 747 (m);  $^1\text{H}$  NMR (400 MHz,  $\text{CDCl}_3$ )  $\delta$  5.84 (ddd,  $J = 9.8, 4.8, 2.0$  Hz, 1H), 5.81–5.73 (m, 1H), 4.79–4.71 (m, 2H), 4.26–4.10 (m, 2H), 3.53–3.37 (m, 1H), 2.70–2.61 (m, 1H), 2.23–2.09 (m, 1H), 1.26 (t,  $J = 7.1$  Hz, 3H), 0.07 (s, 9H);  $^{13}\text{C}$  NMR (100 MHz,  $\text{CDCl}_3$ )  $\delta$  173.1, 128.1, 126.5, 86.1, 65.1, 61.2, 37.2, 29.1, 14.0, -0.1; LRMS (ESI,  $m/z$ ): calcd for  $\text{C}_{12}\text{H}_{21}\text{NO}_5\text{SiNa}^+$ ,  $[\text{M} + \text{Na}^+]$ , 310.1, found 310.1.

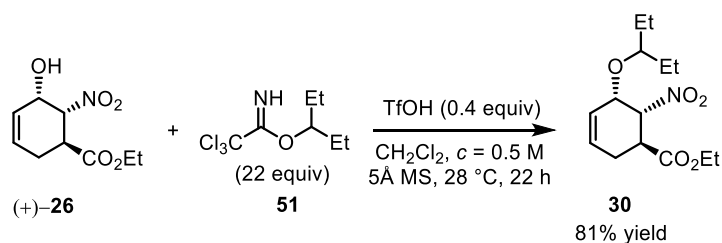

Pentan-3-yl 2,2,2-trichloroacetimidate **51** was prepared through a known procedure.<sup>4</sup>

To an oven-dried 25 mL round bottom flask equipped with a stir bar were added (+)-**26** (430 mg, 2.0 mmol, 1.0 equiv) and 5 Å molecular sieves powder (500 mg). After the flask was evacuated and backfilled with  $\text{N}_2$  twice, anhydrous  $\text{CH}_2\text{Cl}_2$  (4.0 mL) and freshly distilled pentan-3-yl 2,2,2-trichloroacetimidate **51** (7.7 mL, 44 mmol, 22 equiv) were added. The reaction was cooled to 0 °C and TfOH (71  $\mu\text{L}$ , 0.8 mmol, 0.4 equiv) was added. After the addition of TfOH, the reaction mixture was warmed up to 28 °C and stirred at this temperature for 22 h until (+)-**26** was fully consumed (monitored by TLC). The mixture was cooled to 0 °C, and  $\text{Et}_3\text{N}$  (0.28 mL, 2.0 mmol, 1.0 equiv) in  $\text{CH}_2\text{Cl}_2$  (5 mL) was added to quench the reaction. The mixture was filtered and the solid was washed with  $\text{CH}_2\text{Cl}_2$  (10 mL $\times$ 4). The filtrate was concentrated *in vacuo* and the residue was purified through column chromatography (hexanes/ $\text{EtOAc}$ : from 100:1 to 10:1) to afford the desired product **30** as colorless oil (462 mg, 81% yield).

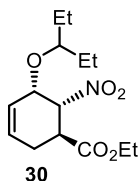

**Ethyl (1S,5S,6R)-6-nitro-5-(pentan-3-yloxy)cyclohex-3-ene-1-carboxylate (30):**  $[\alpha]_{\text{D}}^{20} = +306.4^\circ$  ( $c$  1.02,  $\text{CHCl}_3$ ). IR  $\nu_{\text{max}}$  (neat)/ $\text{cm}^{-1}$ : 2966 (w), 2936 (w), 2878 (w), 1733 (s), 1557 (s),

1463 (m), 1379 (s), 1298 (m), 1263 (m), 1184 (s), 1116 (m), 1077 (s), 1061 (s), 1032 (s), 978 (s), 913 (m), 731 (s);  $^1\text{H}$  NMR (400 MHz,  $\text{CDCl}_3$ )  $\delta$  5.94–5.78 (m, 2H), 4.76 (dd,  $J = 12.0, 4.2$  Hz, 1H), 4.47 (t,  $J = 4.4$  Hz, 1H), 4.22–4.08 (m, 2H), 3.51–3.37 (m, 1H), 3.27–3.16 (m, 1H), 2.70–2.56 (m, 1H), 2.20–2.07 (m, 1H), 1.47–1.30 (m, 4H), 1.23 (t,  $J = 7.1$  Hz, 3H), 0.79 (t,  $J = 7.4$  Hz, 3H), 0.73 (t,  $J = 7.4$  Hz, 3H);  $^{13}\text{C}$  NMR (100 MHz,  $\text{CDCl}_3$ )  $\delta$  173.1, 128.6, 125.2, 85.0, 81.7, 69.2, 61.1, 37.5, 29.0, 26.3, 25.4, 13.9, 9.1, 9.0; LRMS (ESI,  $m/z$ ): calcd for  $\text{C}_{14}\text{H}_{23}\text{NO}_5\text{Na}^+$ ,  $[\text{M} + \text{Na}^+]$ , 308.1, found 308.1.

## D. Iron-Catalyzed Stereoselective Diazidation of Highly Functionalized Substrates for the Synthesis of 3·2TsOH

### a. Initial Attempts for the Direct Diazidation of a Chiral 1,4-Cyclohexadiene **17**

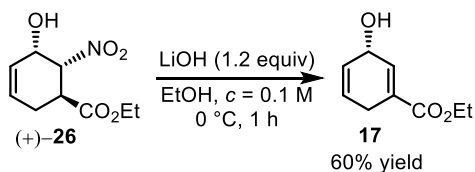

To a flame-dried 50 mL round bottom flask were added (+)-**26** (430 mg, 2.0 mmol, 1.0 equiv) and EtOH (20 mL). After the vial was moved to ice-bath, LiOH (58 mg, 2.4 mmol, 1.2 equiv) was added portion-wise and the mixture was stirred at 0 °C for 1 h until the starting material was fully consumed (monitored by TLC). AcOH (23  $\mu$ L, 0.4 mmol, 0.2 equiv) was added to quench the reaction. EtOH was removed *in vacuo*, and the residue was diluted with EtOAc (10 mL) and water (10 mL). The organic phase was separated from aqueous phase and the aqueous phase was further extracted with EtOAc (10 mL $\times$ 2). The combined organic phase was dried over Na<sub>2</sub>SO<sub>4</sub>. After concentration *in vacuo*, the residue was purified through column chromatography (hexanes/EtOAc: from 30:1 to 3:1) to afford the desired product **17** as colorless oil (202 mg, 60% yield).

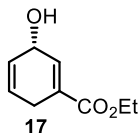

**Ethyl (S)-3-hydroxycyclohexa-1,4-diene-1-carboxylate (17):**  $[\alpha]_{\text{D}}^{20} = +10.2^{\circ}$  ( $c$  1.03, CHCl<sub>3</sub>); IR  $\nu_{\text{max}}$  (neat)/cm<sup>-1</sup>: 3438 (br), 2985 (w), 1724 (s), 1541 (s), 1355 (m), 950 (s); <sup>1</sup>H NMR (400 MHz, CDCl<sub>3</sub>)  $\delta$  6.95 (dq,  $J = 3.6, 1.8$  Hz, 1H), 5.95 (dtd,  $J = 10.1, 3.3, 1.4$  Hz, 1H), 5.89–5.83 (m, 1H), 4.75–4.68 (m, 1H), 4.20 (q,  $J = 7.1$  Hz, 2H), 2.97–2.89 (m, 1H), 2.80 (ddtd,  $J = 9.7, 5.1, 3.5, 1.9$  Hz, 1H), 2.31 (br, 1H), 1.28 (t,  $J = 7.1$  Hz, 3H); <sup>13</sup>C NMR (100 MHz, CDCl<sub>3</sub>)  $\delta$  166.6, 136.6, 129.6, 126.5, 126.2, 62.7, 60.7, 25.9, 14.1; LRMS (ESI,  $m/z$ ): calcd for C<sub>9</sub>H<sub>12</sub>O<sub>3</sub>Na<sup>+</sup>, [M + Na<sup>+</sup>], 191.1, found 191.1.

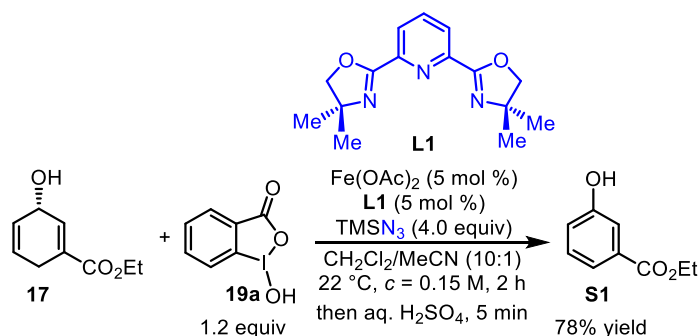

2,6-Bis(4,4-dimethyl-4,5-dihydrooxazol-2-yl)pyridine **L1** was prepared through a known procedure.<sup>5</sup>

To a flame-dried sealable 2-dram vial (vial **A**) equipped with a stir bar were added  $\text{Fe}(\text{OAc})_2$  (5.2 mg, 0.03 mmol, 5 mol %) and the ligand **L1** (8.2 mg, 0.03 mmol, 5 mol %). After this vial was evacuated and backfilled with  $\text{N}_2$  twice, anhydrous  $\text{CH}_2\text{Cl}_2$  (0.6 mL) and MeCN (0.4 mL) were added via syringes and the mixture was stirred at room temperature for 10 min. To a second flame-dried sealable 2-dram vial (vial **B**) equipped with a stir bar was added **17** (101 mg, 0.6 mmol, 1.0 equiv) and benziodoxole **19a** (190 mg, 0.72 mmol, 1.2 equiv). After this vial was evacuated and backfilled with  $\text{N}_2$  twice, anhydrous  $\text{CH}_2\text{Cl}_2$  (3 mL), and freshly distilled  $\text{TMSN}_3$  (315  $\mu\text{L}$ , 2.4 mmol, 4.0 equiv) were added to vial **B** via syringes. After the reaction mixture was cooled to 0 °C, the catalyst solution in vial **A** was added to vial **B** drop-wise. Upon the completion of addition, the mixture was warmed up to room temperature and stirred for additional 2 h. The reaction was quenched with saturated  $\text{NaHCO}_3$  solution (2 mL), and the organic phase was separated from the aqueous phase, which was further extracted with  $\text{CH}_2\text{Cl}_2$  (2 mL $\times$ 3), the combined organic layer was washed with aqueous  $\text{H}_2\text{SO}_4$  (1 M, 3 mL), brine (3 mL) and dried over  $\text{Na}_2\text{SO}_4$ . After concentration *in vacuo*, the residue was purified through column chromatography (hexanes/EtOAc: from 30:1 to 5:1) to afford the product **S1** as a white solid (78 mg, 78% yield) which is a known compound.<sup>6</sup>

**Safety Warning:** Standard precautions with regard to handling  $\text{TMSN}_3$  should be taken during the reaction. For safely handling  $\text{TMSN}_3$ , see the MSDS sheet at <http://www.sigmaaldrich.com/catalog/product/aldrich/155071>

Recent process safety assessment for the iron-catalyzed olefin diazidation demonstrated that most diazides (C/N ratio > 1.5) are thermally stable and they do not decompose until 200 °C;<sup>7</sup> however, they are moderately shock-sensitive: colorless diazides as liquid and foams turned dark-black after Drop Weight Test.<sup>7</sup> Therefore, mechanical impact should be minimized during product isolation and purification.

**b. Initial Attempts for the Direct Diazidation of Highly Functionalized Cyclic Allylic Alcohols under the Standard Iron-Catalyzed Reaction Conditions**

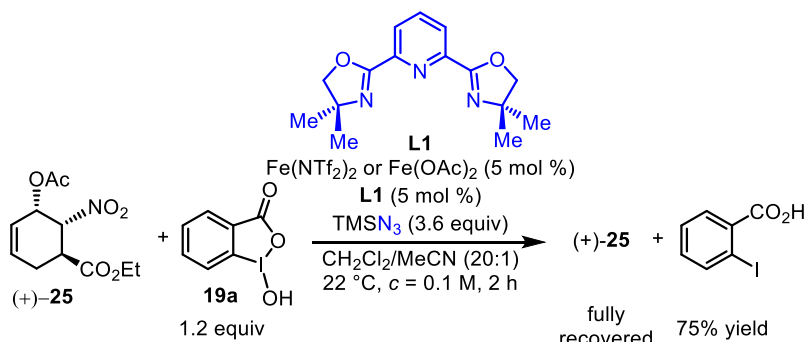

To a flame-dried sealable 2-dram vial (vial **A**) equipped with a stir bar were added  $\text{Fe}(\text{NTf}_2)_2$  or  $\text{Fe}(\text{OAc})_2$  (0.02 mmol, 5 mol %) and **L1** (5.5 mg, 0.02 mmol, 5 mol %). After the vial was evacuated and backfilled with  $\text{N}_2$  three times, anhydrous  $\text{CH}_2\text{Cl}_2$  (0.8 mL) and MeCN (0.2 mL) were added via a syringe and the mixture was stirred at room temperature for 10 min. To another flame-dried 3-dram vial (vial **B**) equipped with a stir bar were added (+)-**25** (103 mg, 0.4 mmol, 1.0 equiv) and **19a** (127 mg, 0.48 mmol, 1.2 equiv). This vial was evacuated and backfilled with  $\text{N}_2$  three times and anhydrous  $\text{CH}_2\text{Cl}_2$  (3.0 mL) was added. Both vials were degassed with brief evacuation and backfilled with  $\text{N}_2$  twice. Freshly distilled  $\text{TMSN}_3$  (189  $\mu\text{L}$ , 1.44 mmol, 3.6 equiv) was added to vial **B** and followed by drop-wise addition of the catalyst solution in vial **A** at room temperature. The reaction was kept at room temperature for 2 h and TLC showed that no new spot was generated, then the reaction was quenched with saturated  $\text{NaHCO}_3$  solution (0.5 mL) and further diluted with  $\text{CH}_2\text{Cl}_2$  (5 mL). The mixture was stirred vigorously for 10 min and filtered through a short silica gel pad. The filtrate was concentrated *in vacuo*. The residue was subsequently purified through a silica gel flash column (hexanes/EtOAc: from 100:1 to 3:1) to afford the starting material (+)-**25** (100 mg, >95% recovered) and 2-iodobenzoic acid (74 mg, 75% yield).



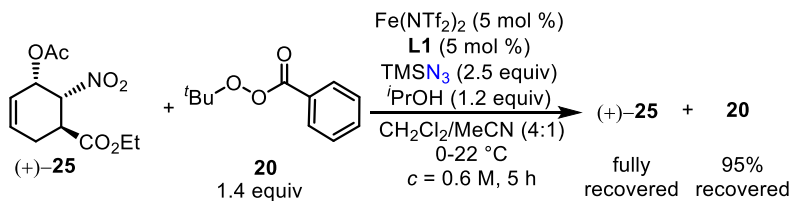

**Note:** Commercially available *tert*-butyl peroxybenzoate **20** (*Luperox*<sup>®</sup> *P*) is viscous liquid and it should be vigorously degassed (purging by N<sub>2</sub> for 15 min) and used as stock solution in CH<sub>2</sub>Cl<sub>2</sub>.

To a flame-dried sealable 2-dram vial (vial **A**) equipped with a stir bar were added Fe(NTf<sub>2</sub>)<sub>2</sub> (31 mg, 0.05 mmol, 5 mol %) and **L1** (14 mg, 0.05 mmol, 5 mol %). After this vial was evacuated and backfilled with N<sub>2</sub> twice, anhydrous CH<sub>2</sub>Cl<sub>2</sub> (0.6 mL) and MeCN (0.3 mL) were added via syringes and the mixture was stirred at room temperature for 10 min. A second flame-dried sealable 3-dram vial (vial **B**) equipped with a stir bar was evacuated and backfilled with N<sub>2</sub> twice. *tert*-Butyl peroxybenzoate **20** (*Luperox*<sup>®</sup> *P*, 272 mg, 1.4 mmol, 1.4 equiv) in anhydrous CH<sub>2</sub>Cl<sub>2</sub> (0.7 mL, *c* = 2.0 M) was added to vial **B**. Both solutions in vial **A** and vial **B** were degassed with brief evacuation and then backfilling with N<sub>2</sub>. (+)-**25** (257 mg, 1.0 mmol, 1.0 equiv), *t*PrOH (92 μL, 1.2 mmol, 1.2 equiv) and freshly opened TMSN<sub>3</sub> (328 μL, 2.5 mmol, 2.5 equiv) were added to vial **B** at 0 °C. Subsequently, the catalyst solution in vial **A** was added to vial **B** using a syringe pump within 20 min. The reaction mixture was warmed up to 22 °C and kept stirring for 5 h and TLC showed that no new spot was generated. The reaction was quenched with saturated NaHCO<sub>3</sub> solution (2 mL), the organic phase was separated from the aqueous phase, which was further extracted with CH<sub>2</sub>Cl<sub>2</sub> (2 mL×3), the combined organic layer was washed with brine (3 mL), and dried over Na<sub>2</sub>SO<sub>4</sub>. After concentration *in vacuo*, the residue was purified through column chromatography to afford the starting material (+)-**25** (249 mg, >95% recovered) and **20** (258 mg, >95% recovered).

**c. Reinvented Iron-Catalyzed Diazidation with Benziodoxole that is Effective for Highly Functionalized (+)-**25****

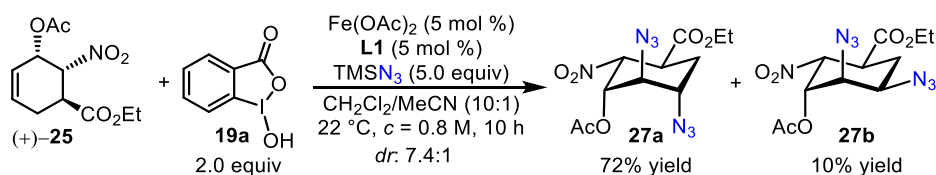

To a flame-dried 250 mL round bottom flask equipped with a stir bar were added  $\text{Fe}(\text{OAc})_2$  (169 mg, 0.97 mmol, 5 mol %), **L1** (265 mg, 0.97 mmol, 5 mol %), (+)-**25** (5.0 g, 19.44 mmol, 1.0 equiv) and benziodoxole **19a** (10.3 g, 38.9 mmol, 2.0 equiv). After the flask was evacuated and backfilled with  $\text{N}_2$  three times, anhydrous  $\text{CH}_2\text{Cl}_2$  (20 mL) and MeCN (2.0 mL) were added via syringes and the mixture was stirred at room temperature for 10 min. Subsequently, freshly opened  $\text{TMSN}_3$  (12.8 mL, 97.2 mmol, 5.0 equiv) was added to the flask at room temperature within 8 h using a syringe pump. The reaction mixture was stirred for additional 2 h until (+)-**25** was fully consumed (monitored by TLC). The reaction was carefully quenched with saturated  $\text{NaHCO}_3$  solution (50 mL) to remove any residual hydrazoic acid and further diluted with  $\text{Et}_2\text{O}$  (160 mL), the resulting suspension was stirred vigorously for 10 min. The mixture was filtered and the solid was washed with  $\text{Et}_2\text{O}$  (20 mL $\times$ 2). The combined filtrate was washed with saturated  $\text{NaHCO}_3$  solution (100 mL), brine (100 mL) and dried over  $\text{Na}_2\text{SO}_4$ . The mixture was filtered through a silica gel pad (*ca.* 6 cm long  $\times$  6 cm diameter) and the pad was washed with ether (100 mL $\times$ 3). After concentration *in vacuo*, the crude diazidation product **27a** and the other diastereomer **27b** were obtained as a yellow solid, which could be used in the next step without further purification. The crude yield and *dr* value were obtained by quantitative  $^1\text{H}$  NMR experiment using 1,3,5-trimethylbenzene as an internal standard (85% NMR yield, *dr*: 7.4:1). For characterization purposes, the crude product was purified through column chromatography (hexanes/ $\text{EtOAc}$ : from 20:1 to 6:1) to afford the desired product **27a** as a white solid (4.78 g, 72% yield) along with the undesired diazidation product **27b** (0.66 g, 10% yield) as yellow oil.

**Safety Warning:** Standard precautions with regard to handling  $\text{TMSN}_3$  should be taken during the reaction. For safely handling  $\text{TMSN}_3$ , see the MSDS sheet at <http://www.sigmaaldrich.com/catalog/product/aldrich/155071>

Recent process safety assessment for the iron-catalyzed olefin diazidation demonstrated that most diazides (C/N ratio > 1.5) are thermally stable and they do not decompose until 200 °C;<sup>7</sup> however, they are moderately shock-sensitive: colorless diazides as liquid and foams turned dark-black after Drop Weight Test.<sup>7</sup> Therefore, mechanical impact should be minimized during product isolation and purification.

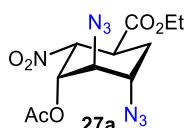

**Ethyl (1*S*,2*R*,3*S*,4*R*,5*S*)-3-acetoxy-4,5-diazido-2-nitrocyclohexane-1-carboxylate (27a):**  $[\alpha]_D^{20} = -6.4^\circ$  (*c* 1.13, CHCl<sub>3</sub>). IR  $\nu_{\max}$  (neat)/cm<sup>-1</sup>: 2966 (w), 2098 (s), 1748 (s), 1727 (s), 1557 (s), 1383 (m), 1232 (s), 1189 (s), 1042 (m), 1024 (m); <sup>1</sup>H NMR (400 MHz, CDCl<sub>3</sub>)  $\delta$  5.34 (dd, *J* = 6.8, 4.3 Hz, 1H), 5.23 (dd, *J* = 6.7, 4.3 Hz, 1H), 4.32–4.16 (m, 3H), 3.68 (q, *J* = 6.1 Hz, 1H), 3.46 (q, *J* = 6.4 Hz, 1H), 2.21 (t, *J* = 6.1 Hz, 2H), 2.12 (s, 3H), 1.31 (t, *J* = 7.1 Hz, 3H); <sup>13</sup>C NMR (100 MHz, CDCl<sub>3</sub>)  $\delta$  170.2, 169.4, 81.8, 69.6, 62.4, 60.9, 57.8, 39.0, 27.4, 20.5, 14.0; LRMS (ESI, *m/z*): calcd for C<sub>11</sub>H<sub>15</sub>N<sub>7</sub>O<sub>6</sub>Na<sup>+</sup>, [M + Na<sup>+</sup>], 364.1, found 364.1.

The stereochemistry of compound **27a** was determined by X-ray crystallographic analysis. (Figure S1)

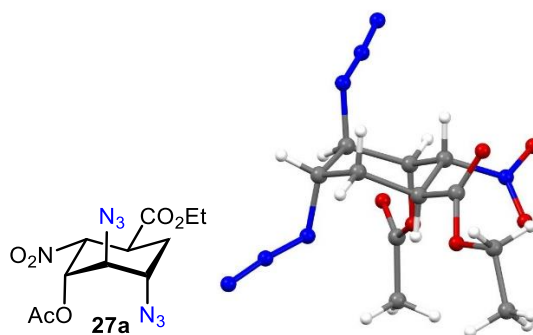

**Figure S1.** The X-ray Crystal Structure of ethyl (1*S*,2*R*,3*S*,4*R*,5*S*)-3-acetoxy-4,5-diazido-2-nitrocyclohexane-1-carboxylate **27a**

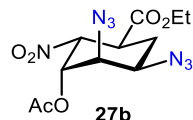

**Ethyl (1*S*,2*R*,3*S*,4*R*,5*R*)-3-acetoxy-4,5-diazido-2-nitrocyclohexane-1-carboxylate (27b):**  $[\alpha]_{\text{D}}^{20} = -12.4^{\circ}$  (*c* 1.05, CHCl<sub>3</sub>). IR  $\nu_{\text{max}}$  (neat)/cm<sup>-1</sup>: 2967 (w), 2097 (s), 1746 (s), 1728 (s), 1557 (s), 1383 (m), 1232 (s), 1190 (s), 1045 (m), 1022 (m), 942 (m); <sup>1</sup>H NMR (400 MHz, benzene-*d*<sub>6</sub>)  $\delta$  5.62 (t, *J* = 3.6 Hz, 1H), 4.96 (dd, *J* = 11.1, 2.7 Hz, 1H), 3.95–3.84 (m, 2H), 3.35–3.29 (m, 1H), 3.08 (td, *J* = 12.3, 4.3 Hz, 1H), 2.99–2.88 (m, 1H), 1.76–1.72 (m, 1H), 1.62–1.49 (m, 1H), 1.42 (s, 3H), 0.90 (t, *J* = 6.8 Hz, 3H); <sup>13</sup>C NMR (100 MHz, benzene-*d*<sub>6</sub>)  $\delta$  170.2, 167.6, 80.7, 69.6, 61.5, 60.6, 56.5, 39.7, 26.2, 19.4, 13.6; LRMS (ESI, *m/z*): calcd for C<sub>11</sub>H<sub>15</sub>N<sub>7</sub>O<sub>6</sub>Na<sup>+</sup>, [M + Na<sup>+</sup>], 364.1, found 364.1.

The full assignment of <sup>1</sup>H NMR of **27b** was carried out through <sup>1</sup>H–<sup>1</sup>H COSY analysis: there are strong correlations between H<sub>e</sub> and H<sub>f1</sub>/H<sub>f2</sub>, H<sub>e</sub> and H<sub>d</sub>, as well as H<sub>d</sub> and H<sub>c</sub>.

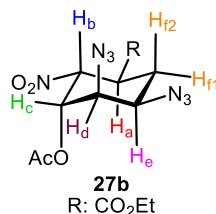

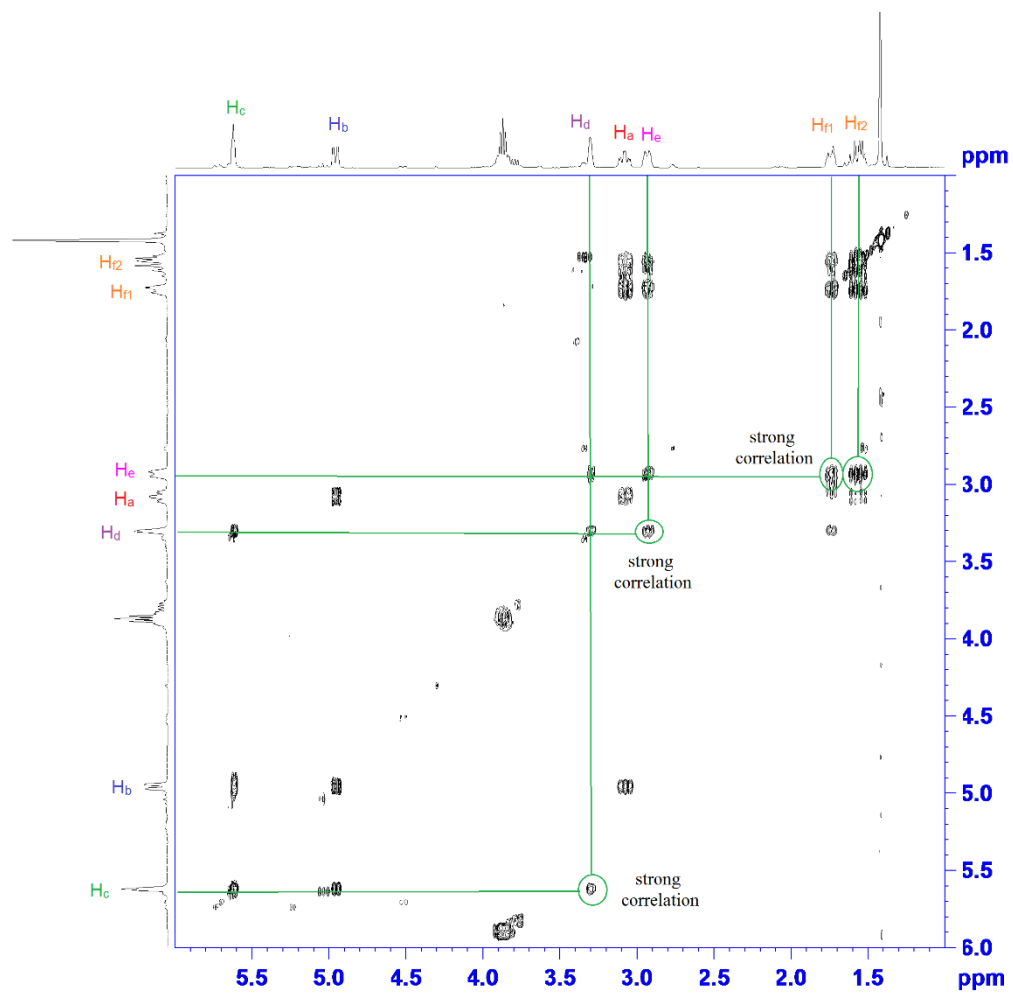

The stereochemistry of **27b** was determined by *NOE* analysis: there is a strong *NOE* between  $H_a$  and  $H_c$ ; however, there is no *NOE* observed either between  $H_d$  and  $H_f$ , or between  $H_d$  and  $H_b$ .

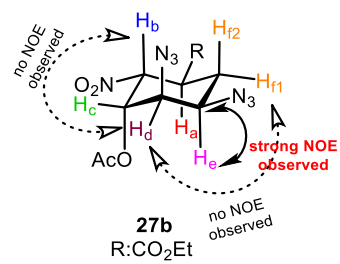

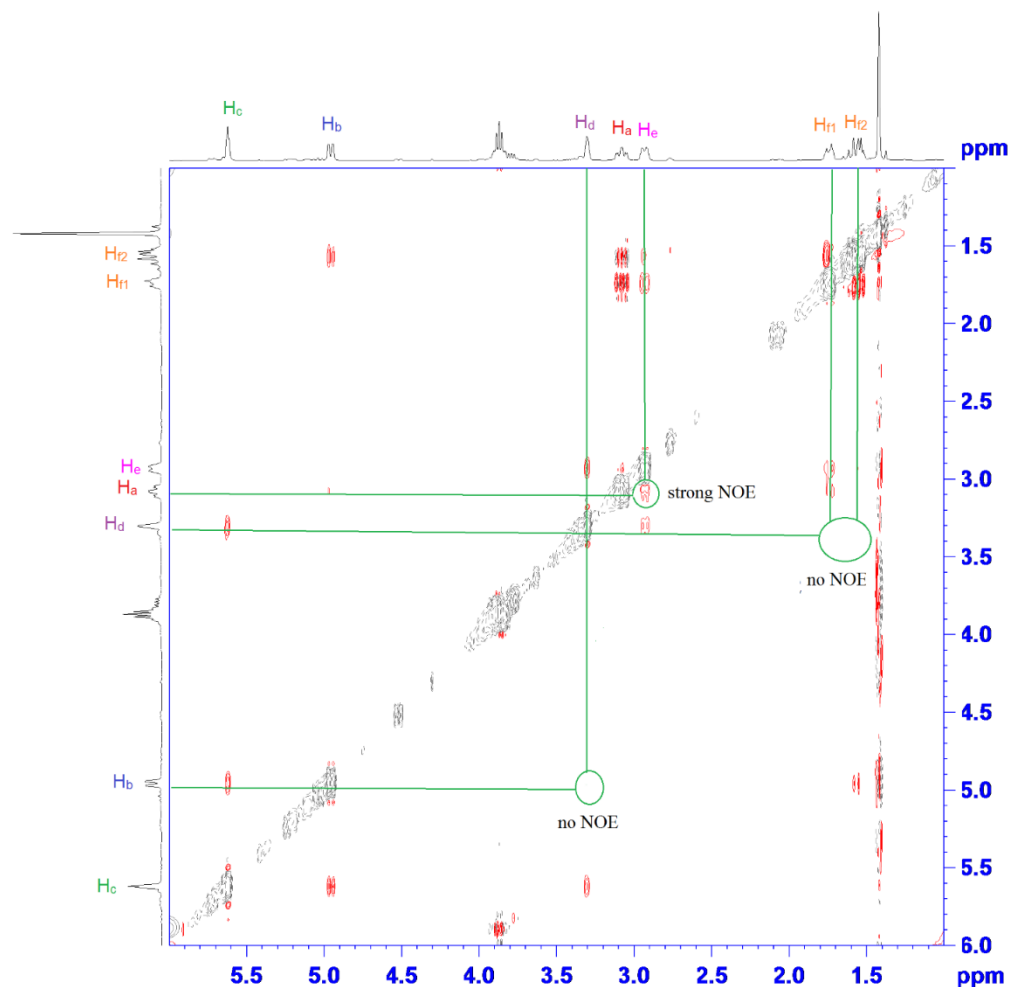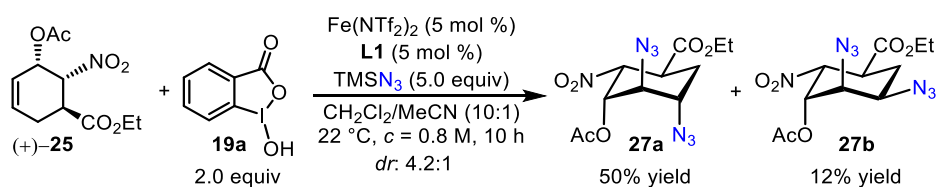

To a flame-dried sealable 2-dram vial equipped with a stir bar were added Fe(NTf<sub>2</sub>)<sub>2</sub> (30.8 mg, 0.05 mmol, 5 mol %), **L1** (13.7 mg, 0.05 mmol, 5 mol %), (+)-**25** (257 mg, 1.0 mmol, 1.0 equiv) and benziodoxole **19a** (528 mg, 2.0 mmol, 2.0 equiv). After the flask was evacuated and backfilled with N<sub>2</sub> three times, anhydrous CH<sub>2</sub>Cl<sub>2</sub> (1.1 mL) and MeCN (0.11 mL) were added via syringes and the mixture was stirred at room temperature for 10 min. Subsequently, freshly

opened TMSN<sub>3</sub> (656  $\mu$ L, 5.0 mmol, 5.0 equiv) was added to the flask at room temperature within 8 h using a syringe pump. The reaction mixture was stirred for additional 2 h until (+)-**25** was fully consumed (monitored by TLC). The reaction was carefully quenched with saturated NaHCO<sub>3</sub> solution (3 mL) to remove any residual hydrazoic acid and further diluted with Et<sub>2</sub>O (8 mL), the resulting suspension was stirred vigorously for 10 min. The mixture was filtered and the solid was washed with Et<sub>2</sub>O (5 mL $\times$ 2). The combined filtrate was washed with saturated NaHCO<sub>3</sub> solution (10 mL), brine (10 mL) and dried over Na<sub>2</sub>SO<sub>4</sub>. After concentration *in vacuo*, the residue was purified through column chromatography (hexanes/EtOAc: from 100:1 to 10:1) to afford the desired diazidation product **27a** as white foam (171 mg, 50% yield) along with the other diastereomer **27b** as colorless oil (41 mg, 12% yield).

**d. Reinvented Iron-Catalyzed Diazidation with Peroxyesters that is Effective for Highly Functionalized (+)-25**

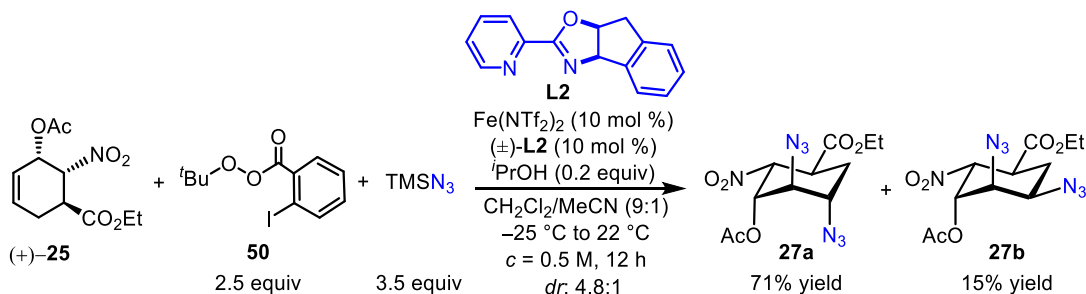

*tert*-Butyl 2-iodobenzoperoxoate **50** and **L2** were prepared through a known procedure.<sup>8</sup>

To a flame-dried sealable 2-dram vial (vial **A**) equipped with a stir bar were added Fe(NTf<sub>2</sub>)<sub>2</sub> (62 mg, 0.1 mmol, 10 mol %) and ligand (±)-**L2** (24 mg, 0.1 mmol, 10 mol %). After this vial was evacuated and backfilled with N<sub>2</sub> twice, anhydrous CH<sub>2</sub>Cl<sub>2</sub> (0.6 mL) and MeCN (0.2 mL) were added via syringes and the mixture was stirred at room temperature for 10 min. To a second flame-dried sealable 2-dram vial (vial **B**) equipped with a stir bar was added (+)-**25** (257 mg, 1.0 mmol, 1.0 equiv) and *tert*-butyl 2-iodobenzoperoxoate **50** (800 mg, 2.5 mmol, 2.5 equiv). After this vial was evacuated and backfilled with N<sub>2</sub> twice, anhydrous CH<sub>2</sub>Cl<sub>2</sub> (1.2 mL), isopropanol (15 μL, 0.2 mmol, 0.2 equiv) and freshly distilled TMSN<sub>3</sub> (460 μL, 3.5 mmol, 3.5 equiv) were added to vial **B** via syringes. After the reaction mixture was cooled to -25 °C, the catalyst solution in vial **A** was added to vial **B** using a syringe pump within 0.5 h. Then the reaction mixture was warmed up to 22 °C and kept stirring for 12 h. CH<sub>2</sub>Cl<sub>2</sub> (4 mL) and saturated NaHCO<sub>3</sub> solution (3 mL) were added to quench the reaction and to remove any residual hydrazoic acid. The organic phase was separated from the aqueous phase, and it was washed with saturated Na<sub>2</sub>CO<sub>3</sub> solution (2 mL), brine (2 mL), and dried over Na<sub>2</sub>SO<sub>4</sub>. After concentration *in vacuo*, the *dr* was obtained by quantitative <sup>1</sup>H NMR experiment using 1,3,5-trimethylbenzene as an internal standard (88% NMR yield, *dr*: 4.8:1). The crude product was purified through column chromatography (hexanes/EtOAc: from 20:1 to 6:1) to afford the desired pure product **27a** as white foam (243 mg, 71% yield) along with the other diastereomer **27b** as yellow oil (51 mg, 15% yield).



Note: no significant match/mismatch effect was observed when (+)-**25** and (-)-**25** were used during the iron-catalyzed diazidation using chiral ligand **L2**.

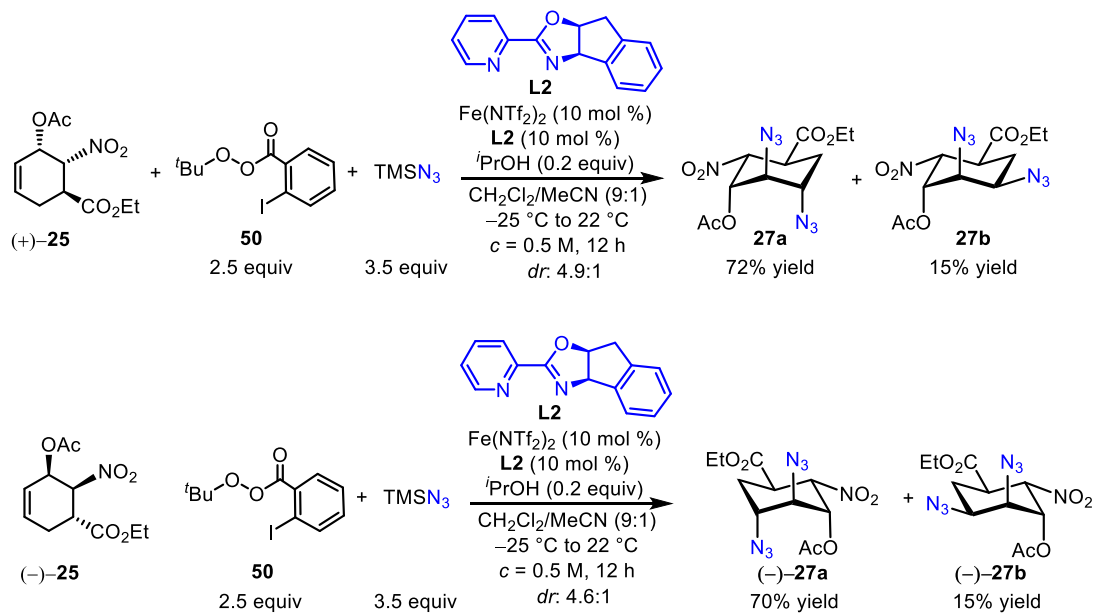

### e. Synthesis of 3·2TsOH from the Olefin Diazidation Product

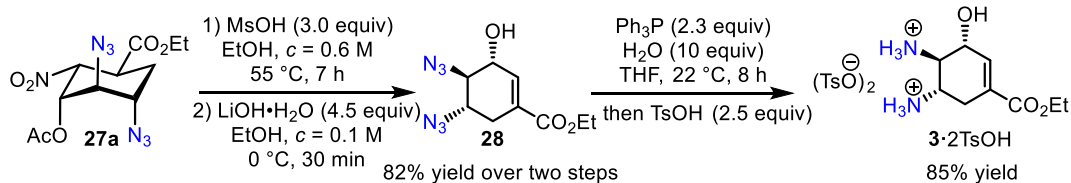

To an oven-dried 250 mL round bottom flask was added the diazidation product **27a** (4.9 g, 14.4 mmol, 1.0 equiv). After the flask was evacuated and backfilled with N<sub>2</sub> twice, EtOH (24 mL) and methanesulfonic acid (2.81 mL, 43.2 mmol, 3.0 equiv) were added via syringes. The mixture was warmed up to 55 °C and stirred at this temperature for 7 h until the starting material was fully consumed (monitored by TLC). The reaction mixture was moved to ice-bath and diluted with EtOH (120 mL). Subsequently, LiOH·H<sub>2</sub>O (2.72 g, 64.8 mmol, 4.5 equiv) was added portion-wise and the mixture was stirred at 0 °C for additional 30 min until the intermediate was consumed (monitored by NMR). AcOH (1.24 mL, 21.6 mmol, 1.5 equiv) was added to quench the reaction. EtOH was removed *in vacuo*, and the residue was diluted with EtOAc (50 mL) and water. The organic phase was separated from aqueous phase and the aqueous phase was further extracted with EtOAc (50 mL×2). The combined organic phase was dried over Na<sub>2</sub>SO<sub>4</sub>. After concentration *in vacuo*, the residue was purified through column chromatography (hexanes/EtOAc: from 30:1 to 3:1) to afford the desired product **28** as yellow oil (2.99 g, 82% yield over two steps).

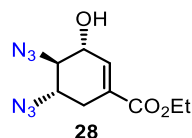

**Ethyl (3R,4R,5S)-4,5-diazido-3-hydroxycyclohex-1-ene-1-carboxylate (28)**:  $[\alpha]_D^{20} = -102^\circ$  ( $c$  0.75, CHCl<sub>3</sub>). IR  $\nu_{\max}$  (neat)/cm<sup>-1</sup>: 3435 (br), 2981 (w), 2103 (s), 1704 (m), 1656 (w), 1250 (s), 1089 (m), 1043 (m), 981 (w); <sup>1</sup>H NMR (400 MHz, CDCl<sub>3</sub>)  $\delta$  6.77 (s, 1H), 4.33–4.28 (m, 1H), 4.24 (q,  $J = 7.1$  Hz, 2H), 3.60 (td,  $J = 10.2, 5.9$  Hz, 1H), 3.48–3.40 (m, 1H), 2.93 (dd,  $J = 18.1, 5.8$  Hz, 1H), 2.58–2.57 (m, 1H), 2.39–2.29 (m, 1H), 1.31 (t,  $J = 7.1$  Hz, 3H); <sup>13</sup>C NMR (100 MHz, CDCl<sub>3</sub>)  $\delta$  165.6, 137.8, 128.5, 70.8, 68.2, 61.5, 59.6, 30.1, 14.1; LRMS (ESI,  $m/z$ ): calcd for C<sub>9</sub>H<sub>12</sub>N<sub>6</sub>O<sub>3</sub>Na<sup>+</sup>,  $[M + Na]^+$ , 275.1, found 275.1.

To a 100 mL round bottom flask with a stir bar was added **28** (2.99 g, 11.9 mmol, 1.0 equiv). After the flask was evacuated and backfilled with N<sub>2</sub> twice, THF (50 mL) and H<sub>2</sub>O (2.1 mL, 118.6 mmol, 10 equiv) were added via syringes. Subsequently, Ph<sub>3</sub>P (7.15 g, 27.3 mmol, 2.3 equiv) in THF (20 mL) was added drop-wise to the reaction at 0 °C. The reaction mixture was warmed up to room temperature and stirred for 8 h (monitored by IR until the absorption of azido groups disappeared). The mixture was then concentrated *in vacuo* and the residue was further dissolved in Et<sub>2</sub>O (30 mL). This solution was added drop-wise to another solution of TsOH·H<sub>2</sub>O (5.6 g, 29.7 mmol, 2.5 equiv) in Et<sub>2</sub>O (60 mL). The reaction was kept stirring for 1 h and the white precipitate was collected by filtration, washed with Et<sub>2</sub>O (10 mL×3) and dried *in vacuo*. The diaminium product **3**·2TsOH was obtained as a white solid (5.5 g, 85% yield, m.p. 220–222 °C).

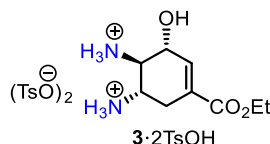

**Ethyl (3*R*,4*R*,5*S*)-4,5-diamino-3-hydroxycyclohex-1-ene-1-carboxylate (3·2TsOH):**  $[\alpha]_{\text{D}}^{20} = +2.1^{\circ}$  (*c* 1.05, CHCl<sub>3</sub>). IR  $\nu_{\text{max}}$  (neat)/cm<sup>-1</sup>: 3328 (br), 2861 (br), 1721 (m), 1536 (m), 1250 (m), 1195 (s), 1162 (s), 1123 (s), 1034 (s), 1009 (s), 808 (s), 684 (s); <sup>1</sup>H NMR (400 MHz, D<sub>2</sub>O)  $\delta$  7.56 (d, *J* = 8.1 Hz, 4H), 7.24 (d, *J* = 8.0 Hz, 4H), 6.74 (s, 1H), 4.45 (d, *J* = 6.5 Hz, 1H), 4.13 (q, *J* = 7.1 Hz, 2H), 3.79 (td, *J* = 9.4, 6.0 Hz, 1H), 3.44 (dd, *J* = 10.0, 8.2 Hz, 1H), 2.86 (dd, *J* = 17.9, 5.9 Hz, 1H), 2.49 (dd, *J* = 18.0, 8.8 Hz, 1H), 2.27 (s, 6H), 1.17 (t, *J* = 7.1 Hz, 3H); <sup>13</sup>C NMR (100 MHz, D<sub>2</sub>O)  $\delta$  166.8, 142.5, 139.4, 137.0, 129.4, 127.3, 125.3, 66.6, 62.5, 53.9, 46.7, 27.4, 20.5, 13.2; LRMS (ESI, *m/z*): calcd for C<sub>9</sub>H<sub>17</sub>N<sub>2</sub>O<sub>3</sub><sup>+</sup>, [M – 2TsOH + H<sup>+</sup>], 201.1, found 201.1.

## E. Safety Assessment of the Olefin Diazidation Product Using Differential Scanning Calorimetry (DSC) and Drop Weight Test (DWT)

### a. Differential Scanning Calorimetry (DSC)

The DSC measurements were performed in a Mettler 821e using 40  $\mu\text{L}$  aluminum punctured crucibles under nitrogen atmosphere or 60  $\mu\text{L}$  high pressure (gold-plated) steel crucibles under air atmosphere. All measurements were carried out at a heating rate of 5 K/min.

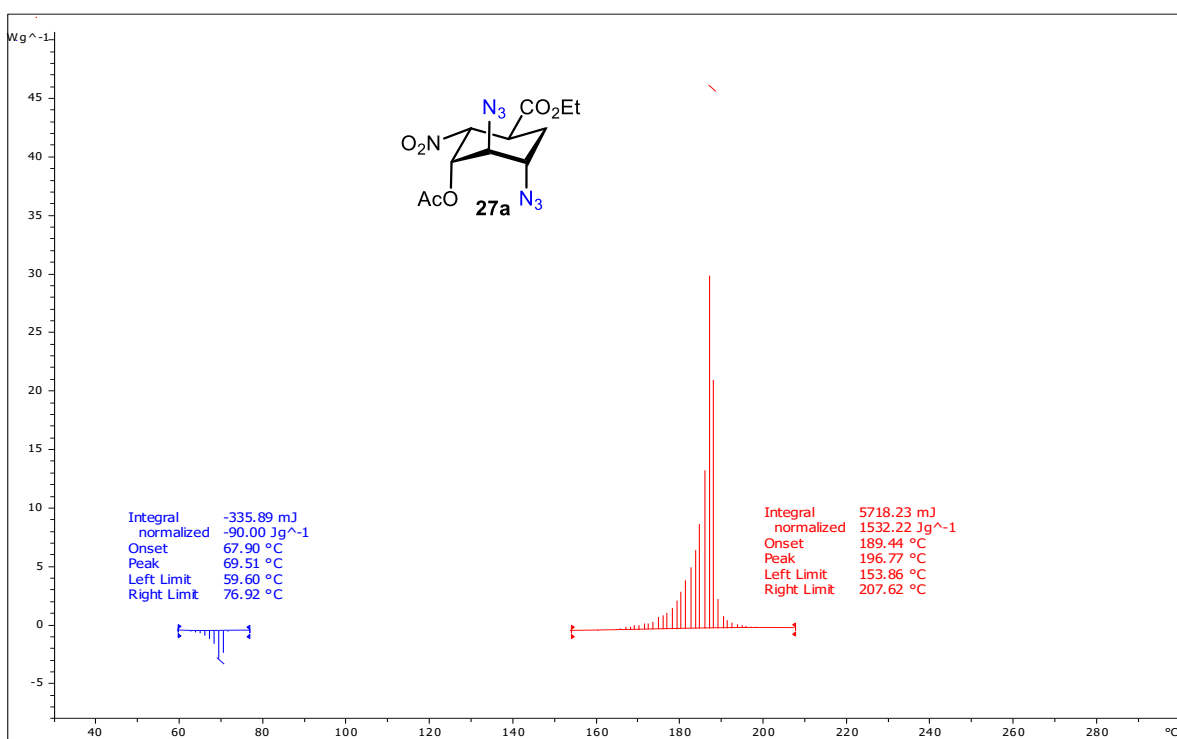

**Figure S2.** DSC Heating Curve of Diazide **27a** in Aluminum Pan

The diazide **27a** is stable towards the DSC (heating rate = 5K/min) under 160 °C. It melts around 69 °C and starts to decompose at 189 °C.

Given the high energy released above 189 °C, careful handling of **27a** at room temperature is strongly recommended.

### b. Mechanical Impact Sensitivity

The Fall Hammer Test (Drop Hammer) designed to determine the sensitivity of potentially high explosive compounds was carried out in accordance to the UN Recommendation on the Transport of Dangerous Goods, Manual of Tests and Criteria–Test 3 (a) (ii) as well as EN 13631–4.

The limiting impact energy is determined as the lowest energy at which a flash, flame, or explosion is observed. The test is used to assess the sensitivity of the test material to drop-weight impact.

The determination of the sensitivity to impact stimuli is one of the most important characteristics of energetic materials such as the diazides, which can be heat and shock-sensitive and can explosively decompose with little input of external energy. This determination is necessary to evaluate their safety in handling, processing or transportation. The tested substances were analyzed by dropping 5 Kg from 0.80 m height, i.e., 400 Kg×cm (40 Newton).

The diazide **27a** is stable towards DWT, while the colorless crystalline solid turns to white powder.

## F. Substrate Structure–Diazidation Stereoselectivity Relationship Studies

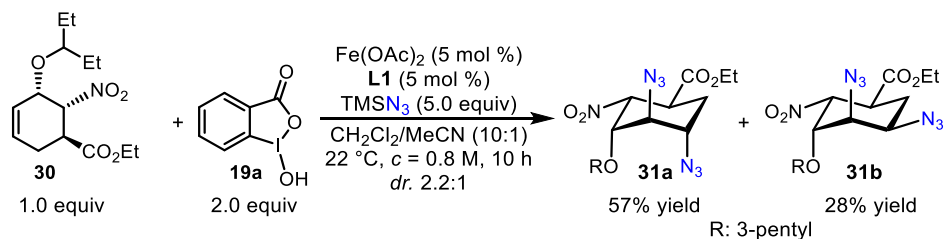

To a flame-dried sealable 2-dram vial equipped with a stir bar were added  $\text{Fe}(\text{OAc})_2$  (8.7 mg, 0.05 mmol, 5 mol %), **L1** (13.7 mg, 0.05 mmol, 5 mol %), **30** (285 mg, 1.0 mmol, 1.0 equiv) and benziodoxole **19a** (528 mg, 2.0 mmol, 2.0 equiv). After the flask was evacuated and backfilled with  $\text{N}_2$  three times, anhydrous  $\text{CH}_2\text{Cl}_2$  (1.1 mL) and MeCN (0.11 mL) were added via syringes and the mixture was stirred at room temperature for 10 min. Subsequently, freshly opened  $\text{TMSN}_3$  (656  $\mu\text{L}$ , 5.0 mmol, 5.0 equiv) was added to the flask at room temperature within 8 h using a syringe pump. The reaction mixture was stirred for additional 2 h until **30** was fully consumed (monitored by TLC). The reaction was carefully quenched with saturated  $\text{NaHCO}_3$  solution (3 mL) to remove any residual hydrazoic acid and further diluted with  $\text{Et}_2\text{O}$  (8 mL), the resulting suspension was stirred vigorously for 10 min. The mixture was filtered and the solid was washed with  $\text{Et}_2\text{O}$  (5 mL $\times$ 2). The combined filtrate was washed with saturated  $\text{NaHCO}_3$  solution (10 mL), brine (10 mL) and dried over  $\text{Na}_2\text{SO}_4$ . After concentration *in vacuo*, the  $dr$  was obtained by quantitative  $^1\text{H}$  NMR experiment using 1,3,5-trimethylbenzene as an internal standard (87% NMR yield,  $dr: 2.2:1$ ). The crude product was purified through column chromatography (hexanes/ $\text{EtOAc}$ : from 100:1 to 10:1) to afford the desired diazidation product **31a** as colorless oil (211 mg, 57% yield) along with the other diastereomer **31b** as colorless oil (103 mg, 28% yield).

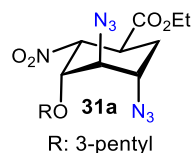

**Ethyl (1*S*,2*R*,3*S*,4*R*,5*S*)-4,5-diazido-2-nitro-3-(pentan-3-yloxy)cyclohexane-1-carboxylate (31a):**  $[\alpha]_{\text{D}}^{20} = +4.3^\circ$  ( $c$  1.20,  $\text{CHCl}_3$ ). IR  $\nu_{\text{max}}$  (neat)/ $\text{cm}^{-1}$ : 2970 (w), 2941 (w), 2881 (w), 2105 (s), 1731 (s), 1558 (s), 1448 (m), 1375 (m), 1264 (s), 1191 (s), 1094 (s), 1020 (m), 736 (s);  $^1\text{H}$

NMR (400 MHz, CDCl<sub>3</sub>)  $\delta$  5.17 (dd,  $J = 5.6, 4.4$  Hz, 1H), 4.28–4.18 (m, 2H), 4.06 (t,  $J = 7.2$  Hz, 1H), 3.98 (dd,  $J = 7.1, 4.3$  Hz, 1H), 3.46 (dd,  $J = 13.2, 7.0$  Hz, 1H), 3.42–3.32 (m, 2H), 2.23–2.13 (m, 2H), 1.66–1.54 (m, 2H), 1.53–1.41 (m, 2H), 1.30 (t,  $J = 7.1$  Hz, 3H), 0.90 (t,  $J = 7.5$  Hz, 3H), 0.82 (t,  $J = 7.4$  Hz, 3H); <sup>13</sup>C NMR (100 MHz, CDCl<sub>3</sub>)  $\delta$  170.7, 83.3, 82.8, 74.1, 63.4, 62.2, 58.1, 39.3, 27.4, 25.1, 24.9, 14.0, 8.9, 8.8; LRMS (ESI, m/z): calcd for C<sub>14</sub>H<sub>23</sub>N<sub>7</sub>O<sub>5</sub>Na<sup>+</sup>, [M + Na<sup>+</sup>], 392.2, found 392.2.

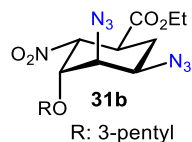

**Ethyl (1*S*,2*R*,3*S*,4*R*,5*R*)-4,5-diaziido-2-nitro-3-(pentan-3-yloxy)cyclohexane-1-carboxylate (31b):**  $[\alpha]_D^{20} = -45.1^\circ$  ( $c$  1.13, CHCl<sub>3</sub>). IR  $\nu_{\max}$  (neat)/cm<sup>-1</sup>: 2971 (w), 2937 (w), 2879 (w), 2105 (s), 1733 (s), 1558 (s), 1462 (m), 1377 (m), 1293 (m), 1266 (s), 1248 (s), 1186 (s), 1093 (s), 991 (m), 737 (s); <sup>1</sup>H NMR (400 MHz, CDCl<sub>3</sub>)  $\delta$  4.87 (dd,  $J = 11.5, 3.1$  Hz, 1H), 4.39 (t,  $J = 3.6$  Hz, 1H), 4.27–4.12 (m, 2H), 4.00–3.94 (m, 1H), 3.93–3.91 (m, 1H), 3.39 (ddd,  $J = 13.2, 11.5, 4.3$  Hz, 1H), 3.22 (quint,  $J = 5.7$  Hz, 1H), 2.26 (dtd,  $J = 12.8, 4.3, 1.3$  Hz, 1H), 1.94–1.84 (m, 1H), 1.53–1.42 (m, 2H), 1.41–1.32 (m, 2H), 1.28 (t,  $J = 7.1$  Hz, 3H), 0.87 (t,  $J = 7.4$  Hz, 3H), 0.74 (t,  $J = 7.4$  Hz, 3H); <sup>13</sup>C NMR (100 MHz, CDCl<sub>3</sub>)  $\delta$  171.3, 83.5, 82.0, 75.4, 62.4, 61.7, 56.7, 39.2, 26.5, 25.8, 24.9, 14.0, 9.6, 8.7; LRMS (ESI, m/z): calcd for C<sub>14</sub>H<sub>23</sub>N<sub>7</sub>O<sub>5</sub>Na<sup>+</sup>, [M + Na<sup>+</sup>], 392.2, found 392.2.

The full assignment of <sup>1</sup>H NMR of **31b** was carried out through <sup>1</sup>H–<sup>1</sup>H COSY NMR analysis: there are strong correlations between H<sub>e</sub> and H<sub>f2</sub>, H<sub>e</sub> and H<sub>d</sub>, as well as H<sub>d</sub> and H<sub>c</sub>. (See below)

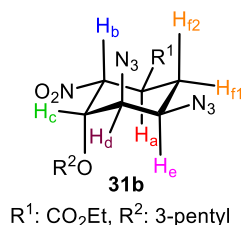

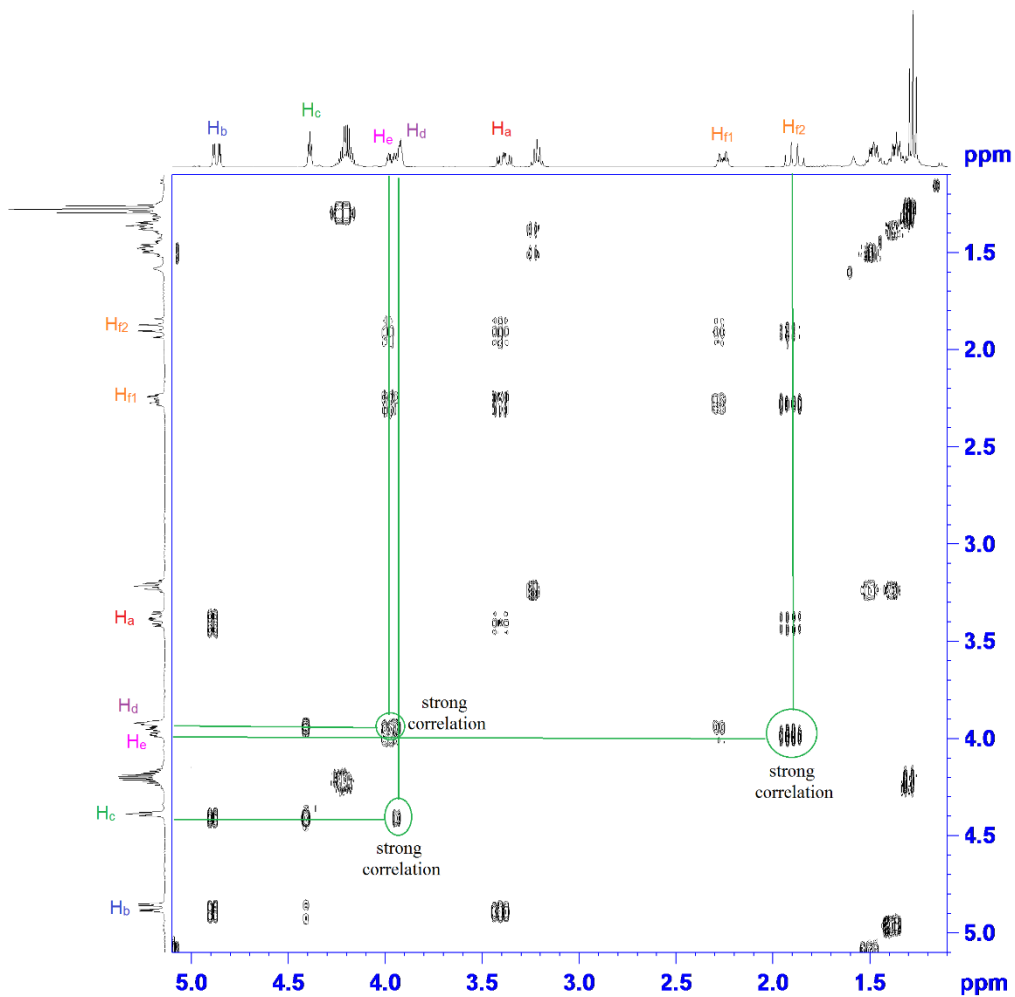

The stereochemistry of **31b** was determined by *NOE* analysis: there is strong *NOE* observed between  $H_a$  and  $H_c$ . However, no *NOE* is observed either between  $H_d$  and  $H_f$ , or  $H_d$  and  $H_b$ . (See below)

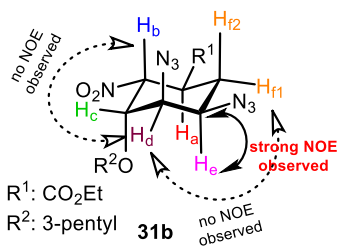



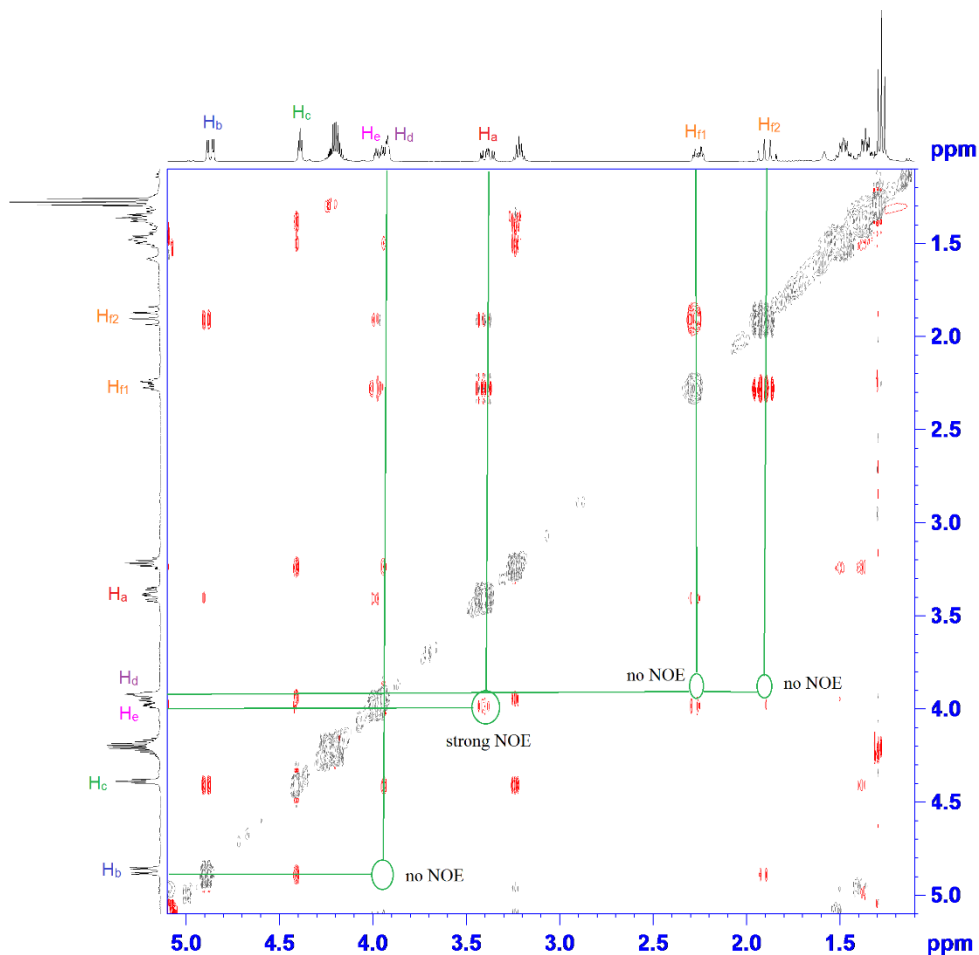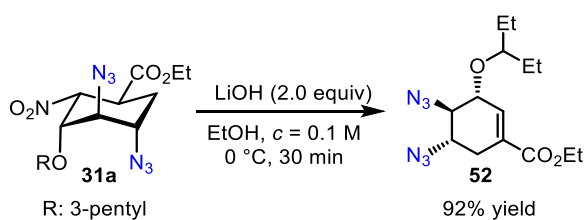

To a 25 mL round bottom flask were added the diazidation product **31a** (200 mg, 0.54 mmol, 1.0 equiv) and EtOH (5.4 mL). After the flask was moved to ice-bath, LiOH (26 mg, 1.08 mmol, 2.0 equiv) was added portion-wise and the mixture was stirred at 0 °C for 30 min until the starting material **31a** was fully consumed (monitored by TLC). AcOH (31  $\mu$ L, 0.54 mmol, 1.0 equiv) was added to quench the reaction. EtOH was removed *in vacuo*, and the residue was diluted with EtOAc (8 mL) and water (8 mL). The organic phase was separated from aqueous phase and

the aqueous phase was further extracted with EtOAc (8 mL×2). The combined organic phase was dried over Na<sub>2</sub>SO<sub>4</sub>. After concentration *in vacuo*, the residue was purified through column chromatography (hexanes/EtOAc: from 30:1 to 3:1) to afford the desired product **52** as yellow oil (160 mg, 92% yield).

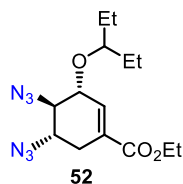

**Ethyl (3R,4R,5S)-4,5-diazido-3-(pentan-3-yloxy)cyclohex-1-ene-1-carboxylate (52):**  $[\alpha]_D^{20} = -140.2^\circ$  (*c* 1.00, CHCl<sub>3</sub>). IR  $\nu_{\max}$  (neat)/cm<sup>-1</sup>: 2970 (w), 2937 (w), 2878 (w), 2103 (s), 1714 (s), 1464 (w), 1368 (w), 1248 (s), 1089 (m), 1057 (s), 984 (w), 734 (s); <sup>1</sup>H NMR (400 MHz, CDCl<sub>3</sub>)  $\delta$  6.76–6.74 (m, 1H), 4.22 (q, *J* = 7.2 Hz, 2H), 4.00 (ddd, *J* = 7.7, 3.7, 1.9 Hz, 1H), 3.50–3.37 (m, 3H), 2.92–2.84 (m, 1H), 2.32–2.17 (m, 1H), 1.66–1.49 (m, 4H), 1.30 (t, *J* = 7.2 Hz, 3H), 0.95 (t, *J* = 7.6 Hz, 3H), 0.93 (t, *J* = 7.6 Hz, 3H); <sup>13</sup>C NMR (100 MHz, CDCl<sub>3</sub>)  $\delta$  165.4, 136.8, 128.2, 82.3, 76.3, 67.6, 61.2, 59.7, 30.2, 26.3, 25.5, 14.2, 9.5, 9.4; LRMS (ESI, *m/z*): calcd for C<sub>14</sub>H<sub>22</sub>N<sub>6</sub>O<sub>3</sub>Na<sup>+</sup>, [M + Na<sup>+</sup>], 345.2, found 345.2.

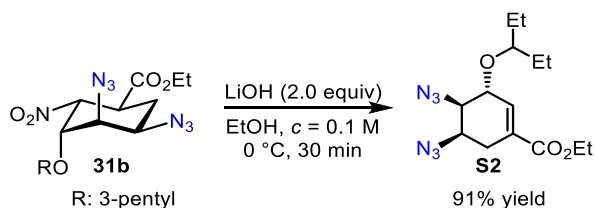

To a flame-dried sealable 2-dram vial equipped with a stir bar were added the diazidation product **31b** (100 mg, 0.27 mmol, 1.0 equiv) and EtOH (2.7 mL). After the vial was moved to ice-bath, LiOH (13 mg, 0.54 mmol, 2.0 equiv) was added portion-wise and the mixture was stirred at 0 °C for 30 min until the starting material **31b** was fully consumed (monitored by TLC). AcOH (16  $\mu$ L, 0.27 mmol, 1.0 equiv) was added to quench the reaction. EtOH was removed *in vacuo*, and the residue was diluted with EtOAc (5 mL) and water (5 mL). The organic phase was separated from aqueous phase and the aqueous phase was further extracted with EtOAc (5

mL×2). The combined organic phase was dried over Na<sub>2</sub>SO<sub>4</sub>. After concentration *in vacuo*, the residue was purified through column chromatography (hexanes/EtOAc: from 30:1 to 3:1) to afford the desired product **S2** as colorless oil (79 mg, 91% yield).

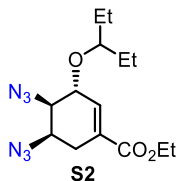

**Ethyl (3R,4R,5R)-4,5-diaziido-3-(pentan-3-yloxy)cyclohex-1-ene-1-carboxylate (S2):**  $[\alpha]_D^{20} = -107.1^\circ$  (*c* 1.00, CHCl<sub>3</sub>). IR  $\nu_{\max}$  (neat)/cm<sup>-1</sup>: 2971 (w), 2935 (w), 2878 (w), 2101 (s), 1714 (s), 1653 (w), 1463 (w), 1253 (s), 1232 (s), 1098 (s), 1054 (s), 952 (m), 756 (s); <sup>1</sup>H NMR (400 MHz, CDCl<sub>3</sub>)  $\delta$  6.81 (dt, *J* = 3.4, 1.7 Hz, 1H), 4.22 (q, *J* = 7.1 Hz, 2H), 4.16–4.09 (m, 1H), 4.01 (ddd, *J* = 6.1, 5.0, 2.5 Hz, 1H), 3.71 (dt, *J* = 8.1, 4.1 Hz, 1H), 3.41 (quint, *J* = 5.8 Hz, 1H), 2.74–2.65 (m, 1H), 2.57 (ddt, *J* = 18.3, 6.1, 1.4 Hz, 1H), 1.63–1.51 (m, 4H), 1.30 (t, *J* = 7.1 Hz, 3H), 0.94 (t, *J* = 7.6 Hz, 3H), 0.92 (t, *J* = 7.6 Hz, 3H); <sup>13</sup>C NMR (100 MHz, CDCl<sub>3</sub>)  $\delta$  165.7, 135.0, 128.9, 82.2, 72.9, 63.2, 61.1, 57.9, 27.7, 26.3, 25.8, 14.2, 9.7, 9.3; LRMS (ESI, *m/z*): calcd for C<sub>14</sub>H<sub>22</sub>N<sub>6</sub>O<sub>3</sub>Na<sup>+</sup>, [M + Na<sup>+</sup>], 345.2, found 345.2.

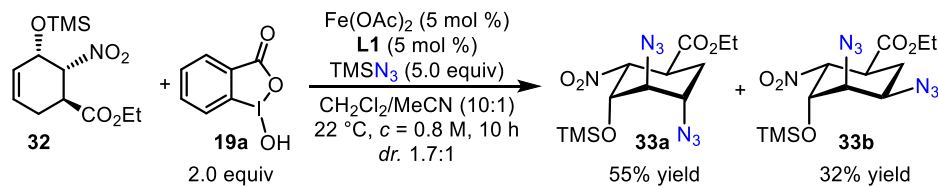

To a flame-dried sealable 2-dram vial equipped with a stir bar were added  $\text{Fe}(\text{OAc})_2$  (8.7 mg, 0.05 mmol, 5 mol %), **L1** (13.7 mg, 0.05 mmol, 5 mol %), **32** (287 mg, 1.0 mmol, 1.0 equiv) and benziodoxole **19a** (528 mg, 2.0 mmol, 2.0 equiv). After the flask was evacuated and backfilled with  $\text{N}_2$  three times, anhydrous  $\text{CH}_2\text{Cl}_2$  (1.1 mL) and MeCN (0.11 mL) were added via syringes and the mixture was stirred at room temperature for 10 min. Subsequently, freshly opened  $\text{TMSN}_3$  (656  $\mu\text{L}$ , 5.0 mmol, 5.0 equiv) was added to the flask at room temperature within 8 h using a syringe pump. The reaction mixture was stirred for additional 2 h until **32** was fully consumed (monitored by TLC). The reaction was carefully quenched with saturated  $\text{NaHCO}_3$  solution (3 mL) to remove any residual hydrazoic acid and further diluted with  $\text{Et}_2\text{O}$  (8 mL), the resulting suspension was stirred vigorously for 10 min. The mixture was filtered and the solid was washed with  $\text{Et}_2\text{O}$  (5 mL $\times$ 2). The combined filtrate was washed with saturated  $\text{NaHCO}_3$  solution (10 mL), brine (10 mL) and dried over  $\text{Na}_2\text{SO}_4$ . After concentration *in vacuo*, the *dr* was obtained by quantitative  $^1\text{H}$  NMR experiment using 1,3,5-trimethylbenzene as an internal standard (88% NMR yield, *dr*: 1.7:1). The crude product was purified through column chromatography (hexanes/ $\text{EtOAc}$ : from 100:1 to 10:1) to afford the desired diazidation product **33a** as colorless oil (204 mg, 55% yield) along with the other diastereomer **33b** as colorless oil (119 mg, 32% yield).

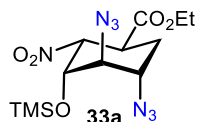

**Ethyl (1*S*,2*R*,3*S*,4*R*,5*S*)-4,5-diazido-2-nitro-3-((trimethylsilyl)oxy)cyclohexane-1-carboxylate (**33a**):**  $[\alpha]_{\text{D}}^{20} = +17.2^\circ$  ( $c$  1.00,  $\text{CHCl}_3$ ). IR  $\nu_{\text{max}}$  (neat)/ $\text{cm}^{-1}$ : 2961 (w), 2104 (s), 1730 (s), 1558 (s), 1446 (w), 1376 (m), 1253 (s), 1189 (s), 1115 (s), 1022 (m), 843 (s), 756 (m);  $^1\text{H}$  NMR (400 MHz,  $\text{CDCl}_3$ )  $\delta$  5.04 (dd,  $J = 5.9, 4.4$  Hz, 1H), 4.30–4.14 (m, 3H), 3.95 (t,  $J = 6.9$  Hz, 1H), 3.47 (td,  $J = 7.4, 4.9$  Hz, 1H), 3.41 (dd,  $J = 12.0, 6.0$  Hz, 1H), 2.28–2.09 (m, 2H), 1.29 (t,  $J = 7.1$  Hz, 3H), 0.18 (s, 9H);  $^{13}\text{C}$  NMR (100 MHz,  $\text{CDCl}_3$ )  $\delta$  170.8, 85.0, 70.4, 64.4, 62.1,

57.6, 38.8, 27.6, 14.0, -0.5; LRMS (ESI, m/z): calcd for  $C_{12}H_{21}N_7O_5SiNa^+$ ,  $[M + Na^+]$ , 394.1, found 394.1.

The full assignment of  $^1H$  NMR of **33a** was carried out through  $^1H$ - $^1H$  COSY NMR analysis: there are strong correlations between  $H_e$  and  $H_{f1}/H_{f2}$ ,  $H_e$  and  $H_d$ , as well as  $H_d$  and  $H_c$ .

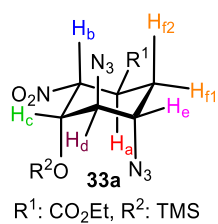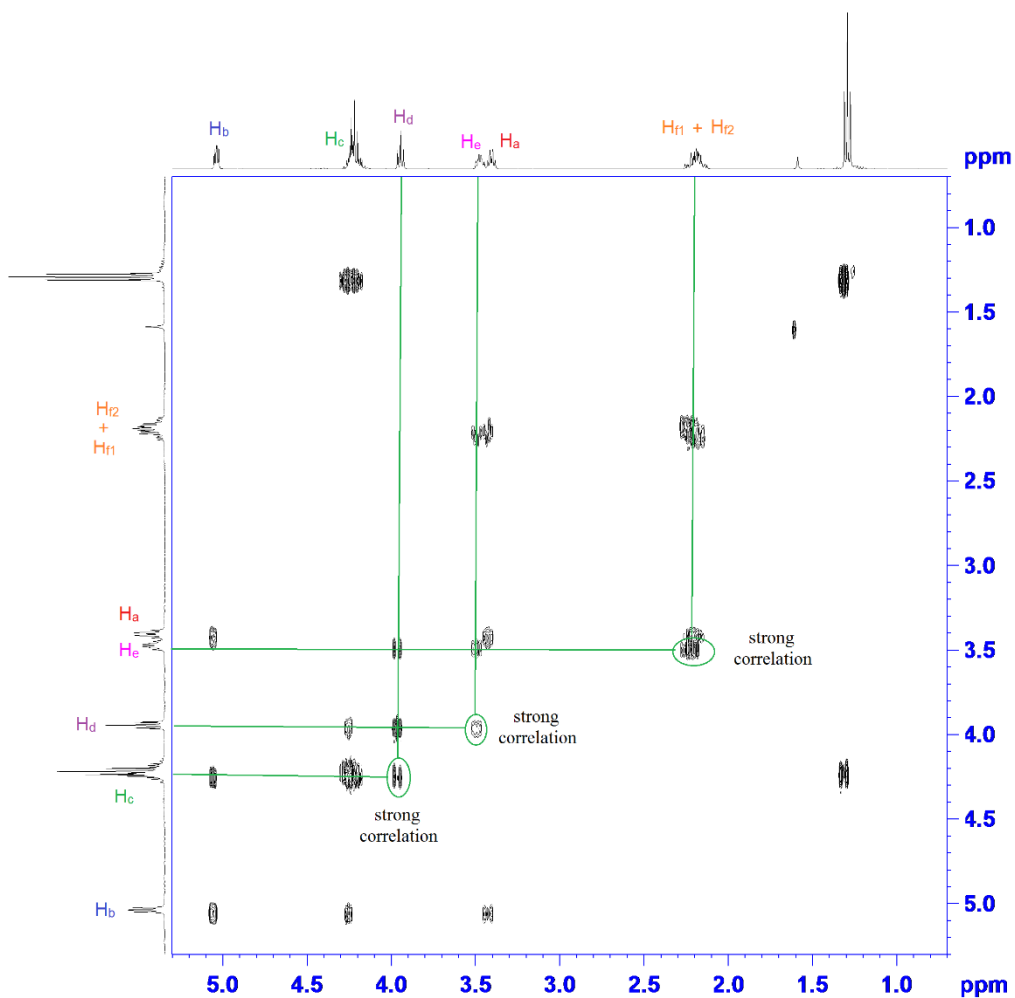

The stereochemistry of **33a** was determined by *NOE* analysis: there is no significant *NOE* observed between  $H_a$  and  $H_c$ ,  $H_d$  and  $H_f$ , or  $H_d$  and  $H_b$ .

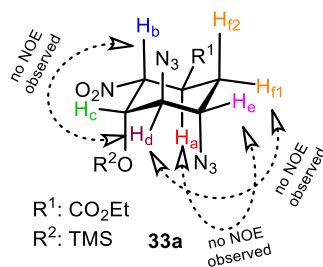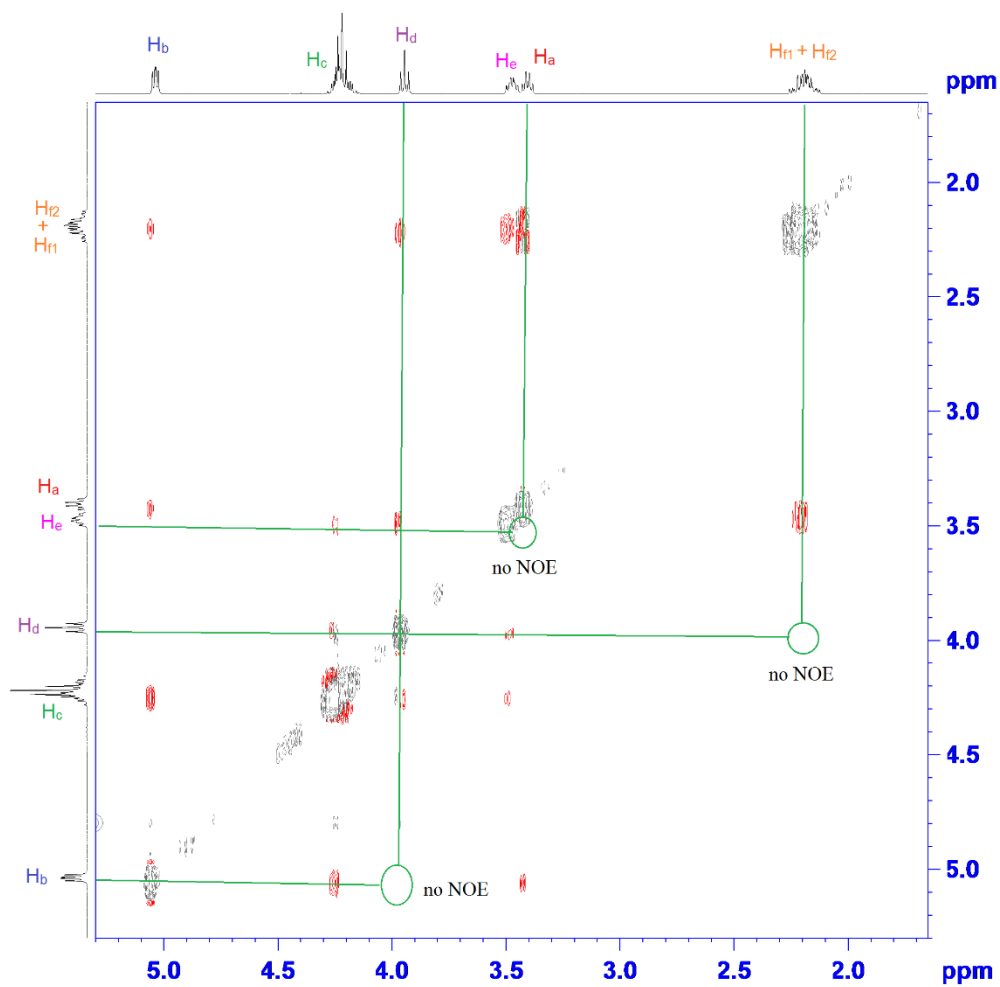

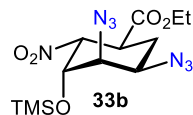

**Ethyl (1*S*,2*R*,3*S*,4*R*,5*R*)-4,5-diazo-2-nitro-3-((trimethylsilyl)oxy)cyclohexane-1-carboxylate (33b):**  $[\alpha]_{\text{D}}^{20} = -61.4^{\circ}$  (*c* 1.33, CHCl<sub>3</sub>). IR  $\nu_{\text{max}}$  (neat)/cm<sup>-1</sup>: 2961 (w), 2106 (s), 1733 (s), 1557 (s), 1386 (m), 1254 (s), 1186 (s), 1110 (s), 991 (m), 844 (s), 737 (s); <sup>1</sup>H NMR (400 MHz, CDCl<sub>3</sub>)  $\delta$  4.85 (dd, *J* = 11.3, 2.7 Hz, 1H), 4.62 (dd, *J* = 3.9, 3.0 Hz, 1H), 4.26–4.14 (m, 2H), 4.00–3.93 (m, 1H), 3.80–3.73 (m, 1H), 3.45–3.34 (m, 1H), 2.30–2.21 (m, 1H), 1.96–1.81 (m, 1H), 1.28 (t, *J* = 7.1 Hz, 3H), 0.10 (s, 9H); <sup>13</sup>C NMR (100 MHz, CDCl<sub>3</sub>)  $\delta$  171.3, 82.9, 71.3, 64.5, 61.7, 56.2, 38.7, 26.5, 14.0, -0.4; LRMS (ESI, *m/z*): calcd for C<sub>12</sub>H<sub>21</sub>N<sub>7</sub>O<sub>5</sub>SiNa<sup>+</sup>, [M + Na<sup>+</sup>], 394.1, found 394.1.

The full assignment of <sup>1</sup>H NMR of **33b** was carried out through <sup>1</sup>H–<sup>1</sup>H COSY NMR analysis: there are strong correlations between H<sub>e</sub> and H<sub>f2</sub>, H<sub>e</sub> and H<sub>d</sub>, as well as H<sub>d</sub> and H<sub>c</sub>.

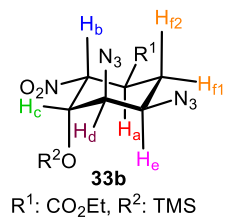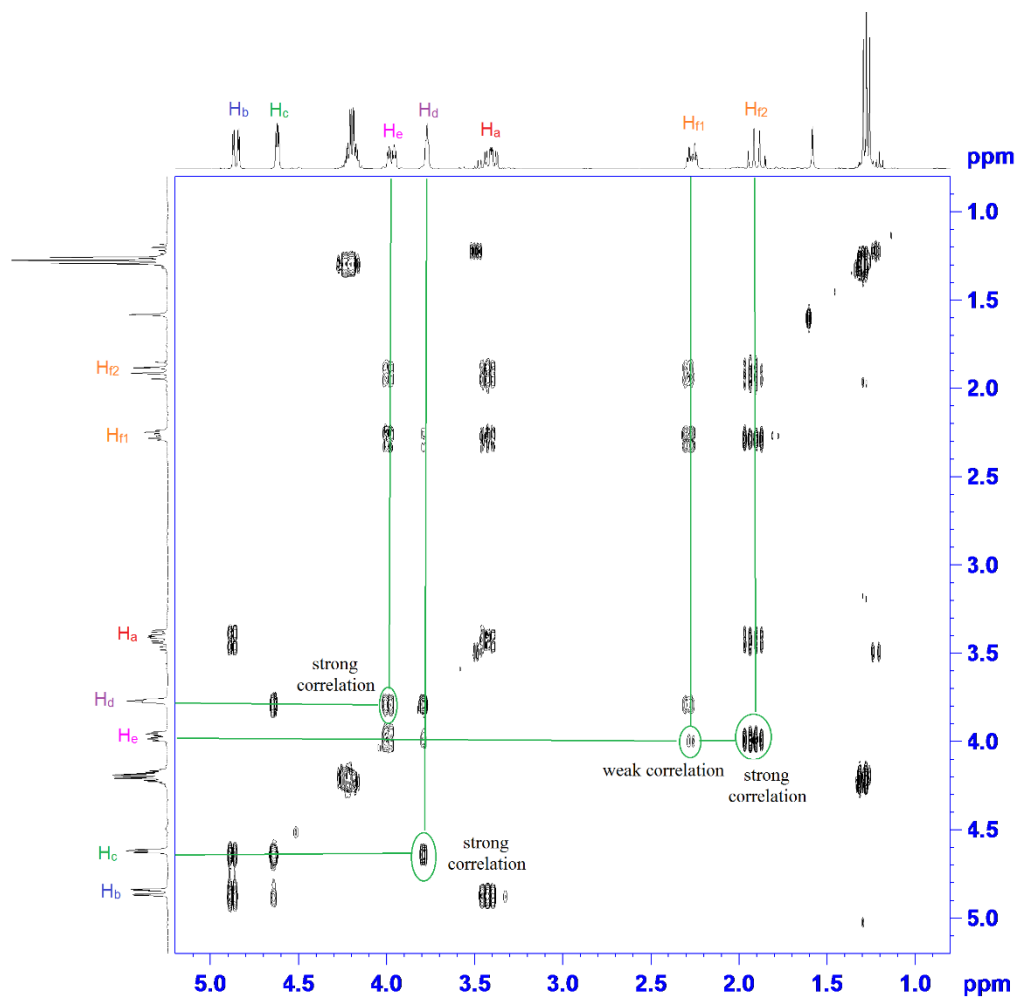

The stereochemistry of **33b** was determined by *NOE* analysis: there is a strong *NOE* observed between H<sub>a</sub> and H<sub>e</sub>. However, no *NOE* is observed either between H<sub>d</sub> and H<sub>f</sub>, or H<sub>d</sub> and H<sub>b</sub>.



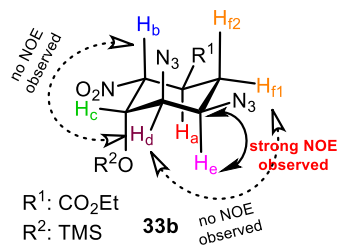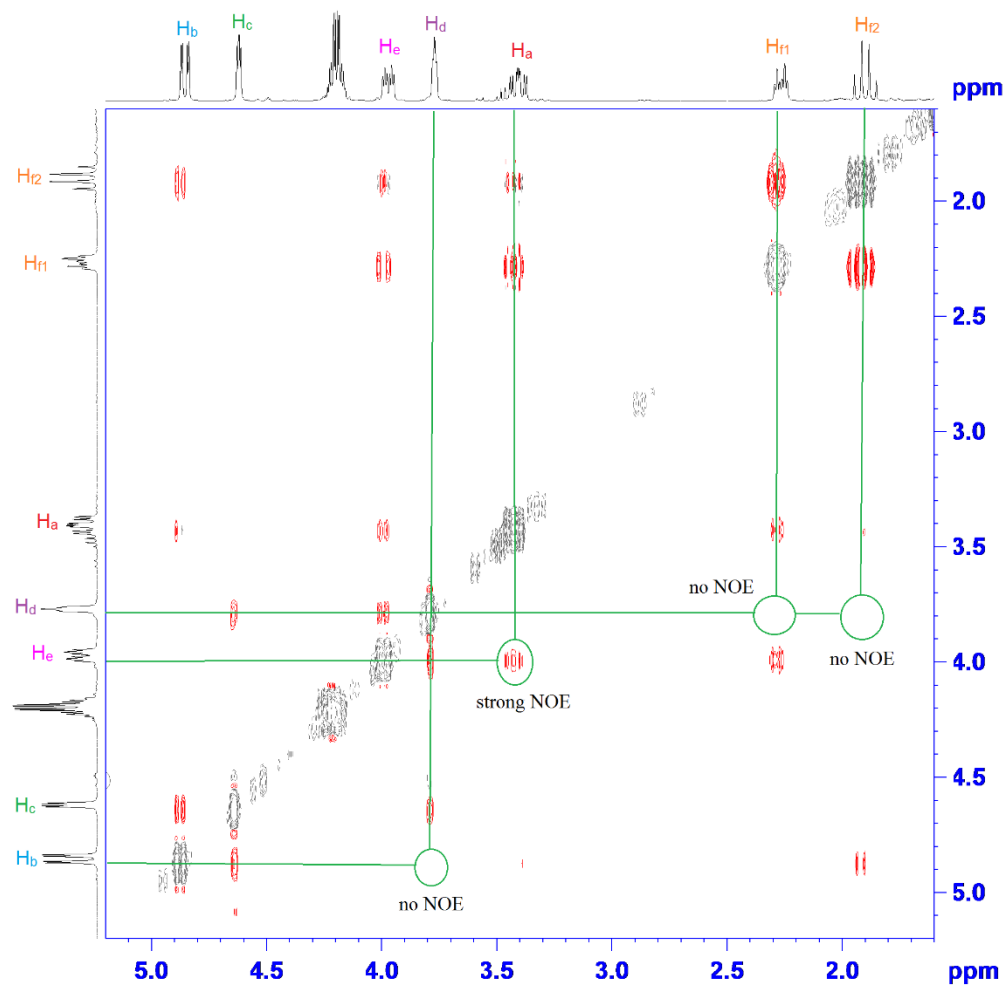

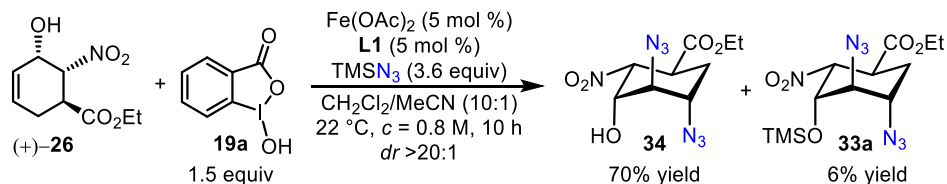

To a flame-dried 100 mL round bottom flask equipped with a stir bar were added  $\text{Fe}(\text{OAc})_2$  (61 mg, 0.35 mmol, 5 mol %), **L1** (95 mg, 0.35 mmol, 5 mol %), (+)-**26** (1.5 g, 6.97 mmol, 1.0 equiv) and benziodoxole **19a** (2.76 g, 10.46 mmol, 1.5 equiv). After the flask was evacuated and backfilled with  $\text{N}_2$  three times, anhydrous  $\text{CH}_2\text{Cl}_2$  (8 mL) and MeCN (0.8 mL) were added via syringes and the mixture was stirred at room temperature for 10 min. Subsequently, freshly opened  $\text{TMSN}_3$  (3.3 mL, 25.1 mmol, 3.6 equiv) was added to the flask at room temperature within 8 h using a syringe pump. The reaction mixture was stirred for additional 2 h until (+)-**26** was fully consumed (monitored by TLC). The reaction was carefully quenched with saturated  $\text{NaHCO}_3$  solution (20 mL) to remove any residual hydrazoic acid and further diluted with  $\text{Et}_2\text{O}$  (60 mL), the resulting suspension was stirred vigorously for 10 min. The mixture was filtered and the solid was washed with  $\text{Et}_2\text{O}$  (15 mL $\times$ 2). The combined filtrate was washed with saturated  $\text{NaHCO}_3$  solution (50 mL), brine (50 mL) and dried over  $\text{Na}_2\text{SO}_4$ . The mixture was filtered through a silica gel pad (*ca.* 6 cm long  $\times$  6 cm diameter) and the pad was washed with ether (50 mL $\times$ 3). After concentration *in vacuo*, the crude diazidation products **34** and **33a** were obtained as yellow oil, *which could be used directly without further purification*. The crude yield of compound **34** and **33a** were obtained by quantitative  $^1\text{H}$  NMR experiment using 1,3,5-trimethylbenzene as an internal standard (71% NMR yield for compound **34** and 7% NMR yield for compound **33a**). For characterization purposes, the crude mixture was purified through column chromatography (hexanes/ $\text{EtOAc}$ : from 20:1 to 6:1) to afford the desired product **34** as colorless oil (1.46 g, 70% yield) along with the *O*-TMS protected diazidation product **33a** as colorless oil (155 mg, 6% yield)

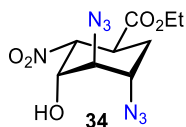

**Ethyl (1S,2R,3S,4R,5S)-4,5-diazido-3-hydroxy-2-nitrocyclohexane-1-carboxylate (34):**  $[\alpha]_{\text{D}}^{20} = +4.2^\circ$  (*c* 1.01,  $\text{CHCl}_3$ ). IR  $\nu_{\text{max}}$  (neat)/ $\text{cm}^{-1}$ : 3462 (w), 2920 (w), 2110 (s), 1729 (s), 1558 (s),

1377 (m), 1258 (s), 1200 (m), 1095 (m), 1021 (m), 955(w), 874 (w);  $^1\text{H}$  NMR (400 MHz,  $\text{CDCl}_3$ )  $\delta$  5.04 (dd,  $J = 8.4, 3.9$  Hz, 1H), 4.40–4.36 (m, 1H), 4.27–4.18 (m, 2H), 4.06 (t,  $J = 5.4$  Hz, 1H), 3.78 (dd,  $J = 9.6, 5.2$  Hz, 1H), 3.48 (td,  $J = 8.7, 5.2$  Hz, 1H), 3.24 (d,  $J = 7.0$  Hz, 1H), 2.26–2.07 (m, 2H), 1.29 (t,  $J = 7.1$  Hz, 3H);  $^{13}\text{C}$  NMR (100 MHz,  $\text{CDCl}_3$ )  $\delta$  170.9, 83.7, 70.0, 62.7, 62.2, 58.3, 37.4, 27.4, 14.0; LRMS (ESI,  $m/z$ ): calcd for  $\text{C}_9\text{H}_{13}\text{N}_7\text{O}_5\text{Na}^+$ ,  $[\text{M} + \text{Na}^+]$ , 322.1, found 322.1.

The full assignment of  $^1\text{H}$  NMR of **34** was carried out through  $^1\text{H}$ - $^1\text{H}$  COSY NMR analysis: there are strong correlations between  $\text{H}_e$  and  $\text{H}_{f1}/\text{H}_{f2}$ ,  $\text{H}_e$  and  $\text{H}_d$ , as well as  $\text{H}_d$  and  $\text{H}_c$ .

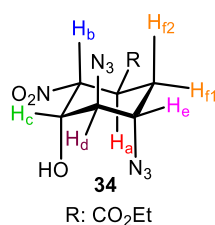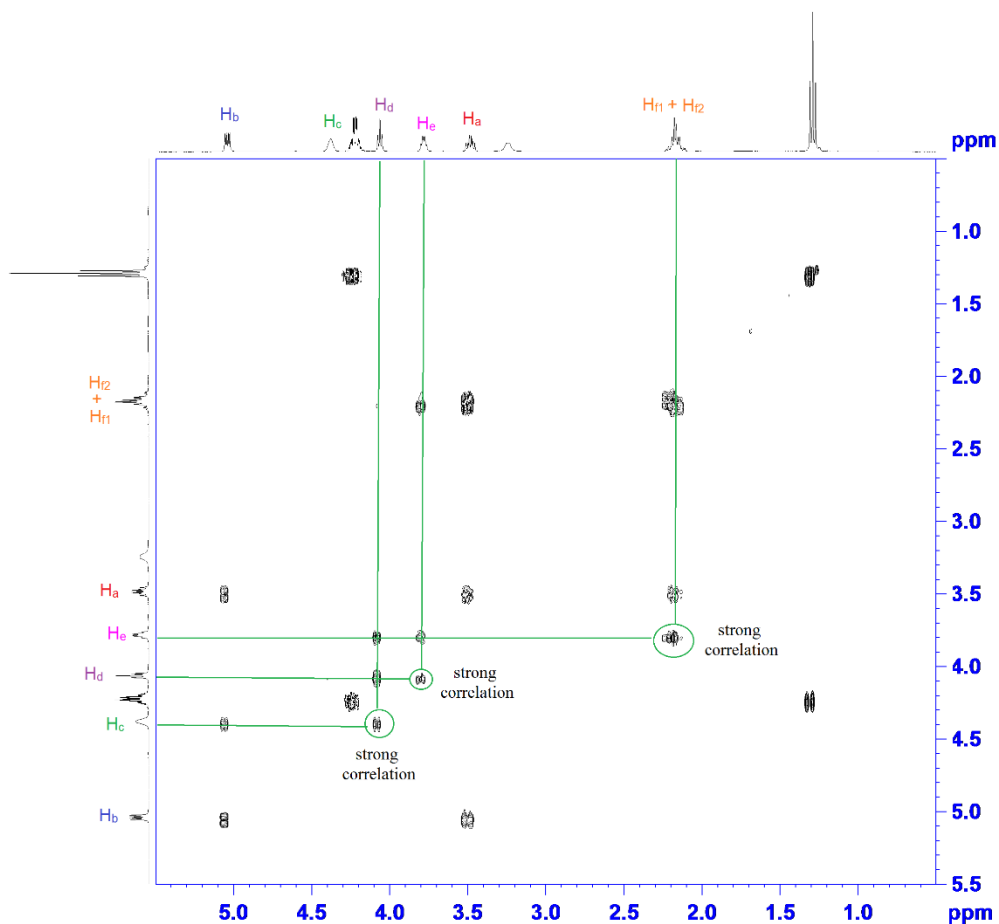

The stereochemistry of **34** was determined by *NOE* analysis: there is no significant *NOE* observed either between  $H_a$  and  $H_e$ , or  $H_d$  and  $H_b$ .

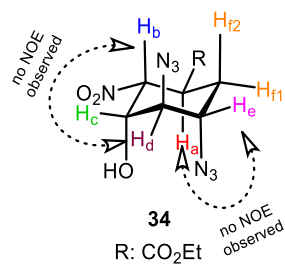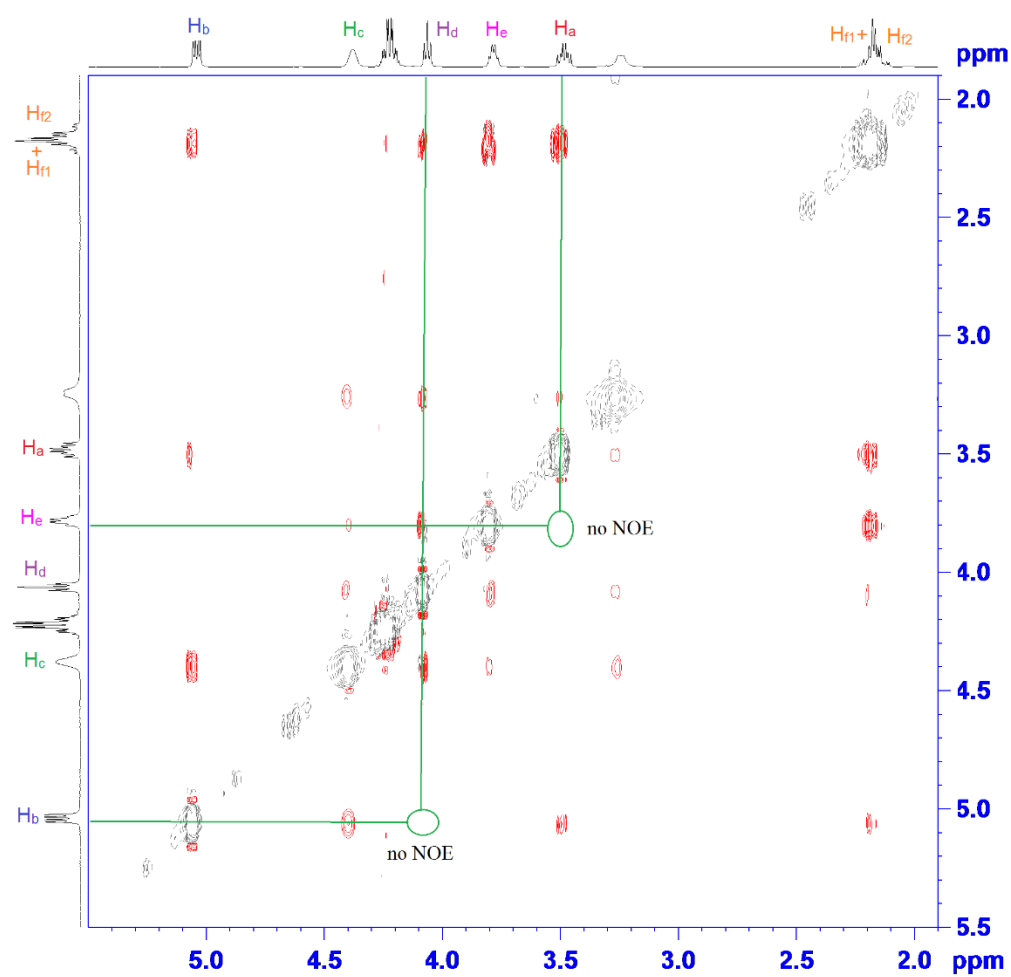

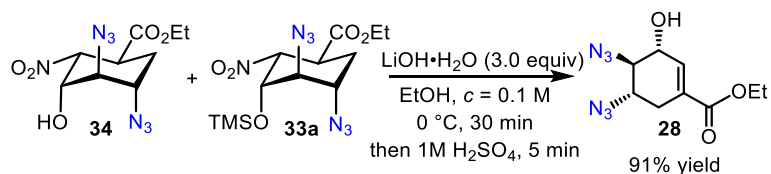

To a 100 mL round bottom flask were added the crude diazidation products **34** and **33a** (5.3 mmol, 1.0 equiv) obtained in last step and EtOH (53 mL). After the flask was moved to ice-bath, LiOH·H<sub>2</sub>O (0.67 g, 15.9 mmol, 3.0 equiv) was added portion-wise and the mixture was stirred at 0 °C for 30 min until the starting material was fully consumed (monitored by TLC). Aqueous H<sub>2</sub>SO<sub>4</sub> solution (1 M, 26.5 mL, 26.5 mmol, 5.0 equiv) was added and stirred for 5 min. EtOH was removed *in vacuo*, and the residue was diluted with EtOAc (30 mL). The organic phase was separated from aqueous phase and the aqueous phase was further extracted with EtOAc (30 mL×2). The combined organic phase was dried over Na<sub>2</sub>SO<sub>4</sub>. After concentration *in vacuo*, the residue was purified through column chromatography (hexanes/EtOAc: from 30:1 to 3:1) to afford the desired product **28** as yellow oil (1.21 g, 91% yield).

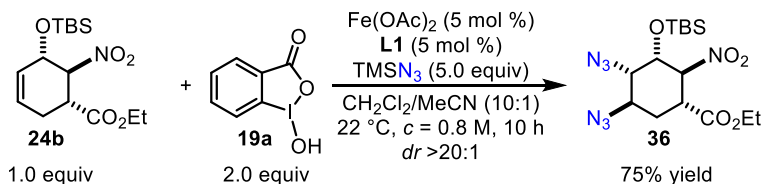

To a flame-dried sealable 2-dram vial equipped with a stir bar were added  $\text{Fe}(\text{OAc})_2$  (8.7 mg, 0.05 mmol, 5 mol %), **L1** (13.7 mg, 0.05 mmol, 5 mol %), **24b** (330 mg, 1.0 mmol, 1.0 equiv) and benziodoxole **19a** (528 mg, 2.0 mmol, 2.0 equiv). After the flask was evacuated and backfilled with  $\text{N}_2$  three times, anhydrous  $\text{CH}_2\text{Cl}_2$  (1.1 mL) and MeCN (0.11 mL) were added via syringes and the mixture was stirred at room temperature for 10 min. Subsequently, freshly opened  $\text{TMSN}_3$  (656  $\mu\text{L}$ , 5.0 mmol, 5.0 equiv) was added to the flask at room temperature within 8 h using a syringe pump. The reaction mixture was stirred for additional 2 h until **24b** was fully consumed (monitored by TLC). The reaction was carefully quenched with saturated  $\text{NaHCO}_3$  solution (3 mL) to remove any residual hydrazoic acid and further diluted with  $\text{Et}_2\text{O}$  (8 mL), the resulting suspension was stirred vigorously for 10 min. The mixture was filtered and the solid was washed with  $\text{Et}_2\text{O}$  (5 mL $\times$ 2). The combined filtrate was washed with saturated  $\text{NaHCO}_3$  solution (10 mL), brine (10 mL) and dried over  $\text{Na}_2\text{SO}_4$ . After concentration *in vacuo*, the residue was purified through column chromatography (hexanes/ $\text{EtOAc}$ : from 100:1 to 10:1) to afford the diazidation product **36** as a foam (310 mg, 75% yield).

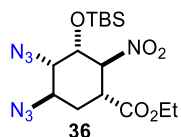

( $\pm$ )-Ethyl (1*R*,2*S*,3*S*,4*S*,5*R*)-4,5-diazido-3-((*tert*-butyldimethylsilyl)oxy)-2-nitrocyclohexane-1-carboxylate (**36**): IR  $\nu_{\text{max}}$  (neat)/ $\text{cm}^{-1}$ : 2933 (w), 2859 (w), 2107 (s), 1723 (s), 1556 (s), 1383 (m), 1257 (s), 1203 (s), 1107 (s), 1026 (m), 836 (s), 778 (s);  $^1\text{H}$  NMR (400 MHz,  $\text{CDCl}_3$ )  $\delta$  4.90 (dd,  $J = 11.3, 9.9$  Hz, 1H), 4.43 (dd,  $J = 9.9, 3.1$  Hz, 1H), 4.16 (q,  $J = 7.2$  Hz, 2H), 3.95 (dd,  $J = 6.6, 3.1$  Hz, 1H), 3.84 (t,  $J = 3.0$  Hz, 1H), 3.32 (ddd,  $J = 12.9, 11.5, 4.5$  Hz, 1H), 2.15–2.07 (m, 1H), 2.01 (ddd,  $J = 14.7, 13.1, 3.0$  Hz, 1H), 1.24 (t,  $J = 7.1$  Hz, 3H), 0.89 (s, 9H), 0.11 (s, 3H), 0.05 (s, 3H);  $^{13}\text{C}$  NMR (100 MHz,  $\text{CDCl}_3$ )  $\delta$  170.0, 87.0, 71.1, 63.7, 61.9, 58.7, 40.8, 26.3, 25.5,

17.9, 13.9, -4.3, -5.8; LRMS (ESI, m/z): calcd for  $C_{15}H_{27}N_7O_5Na^+$ ,  $[M + Na^+]$ , 436.2, found 436.2.

The full assignment of  $^1H$  NMR of **36** was carried out through  $^1H$ - $^1H$  COSY NMR analysis: there are strong correlations between  $H_e$  and  $H_{f1}/H_{f2}$ ,  $H_e$  and  $H_d$ , as well as  $H_d$  and  $H_c$ .

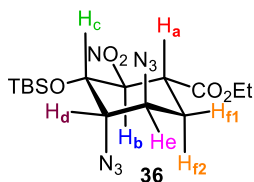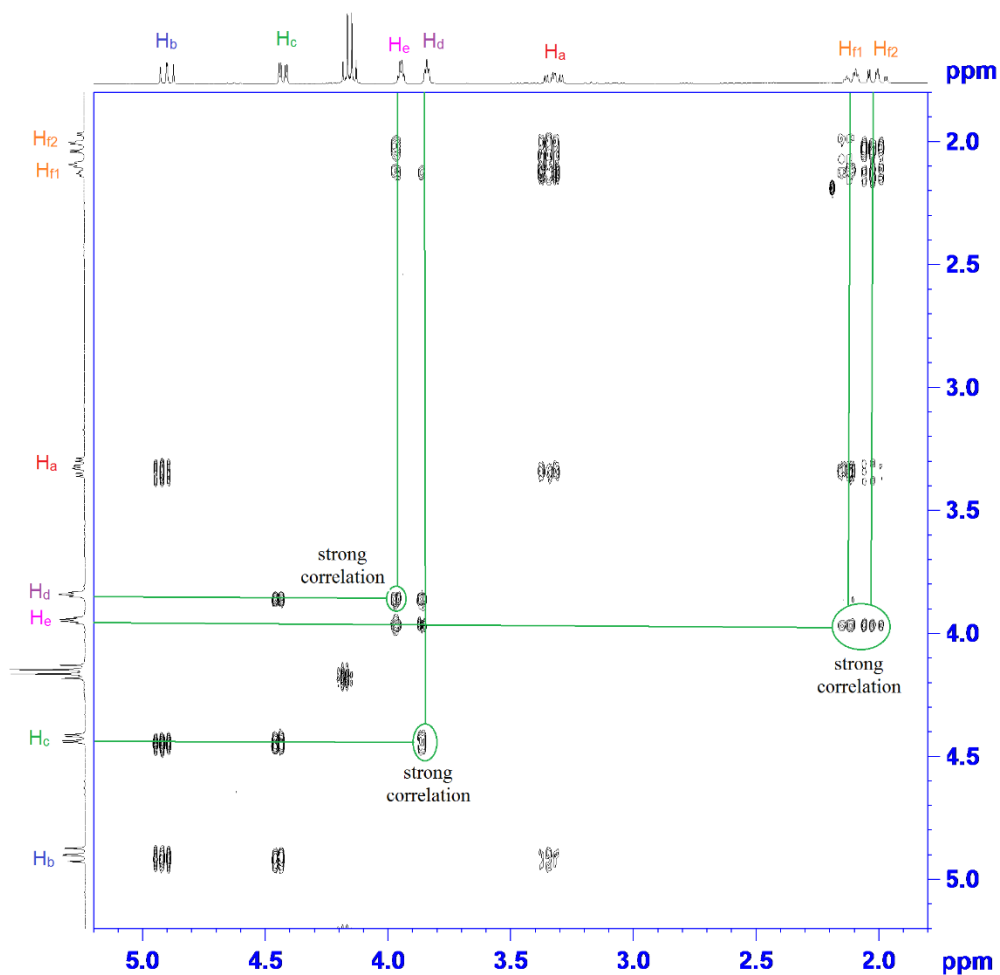

The stereochemistry of **36** was determined by *NOE* analysis: there is no significant *NOE* observed between  $H_a$  and  $H_e$ ,  $H_d$  and  $H_b$ , or  $H_d$  and  $H_f$ . (See below)

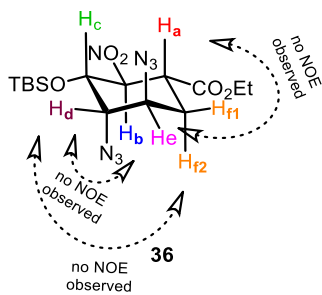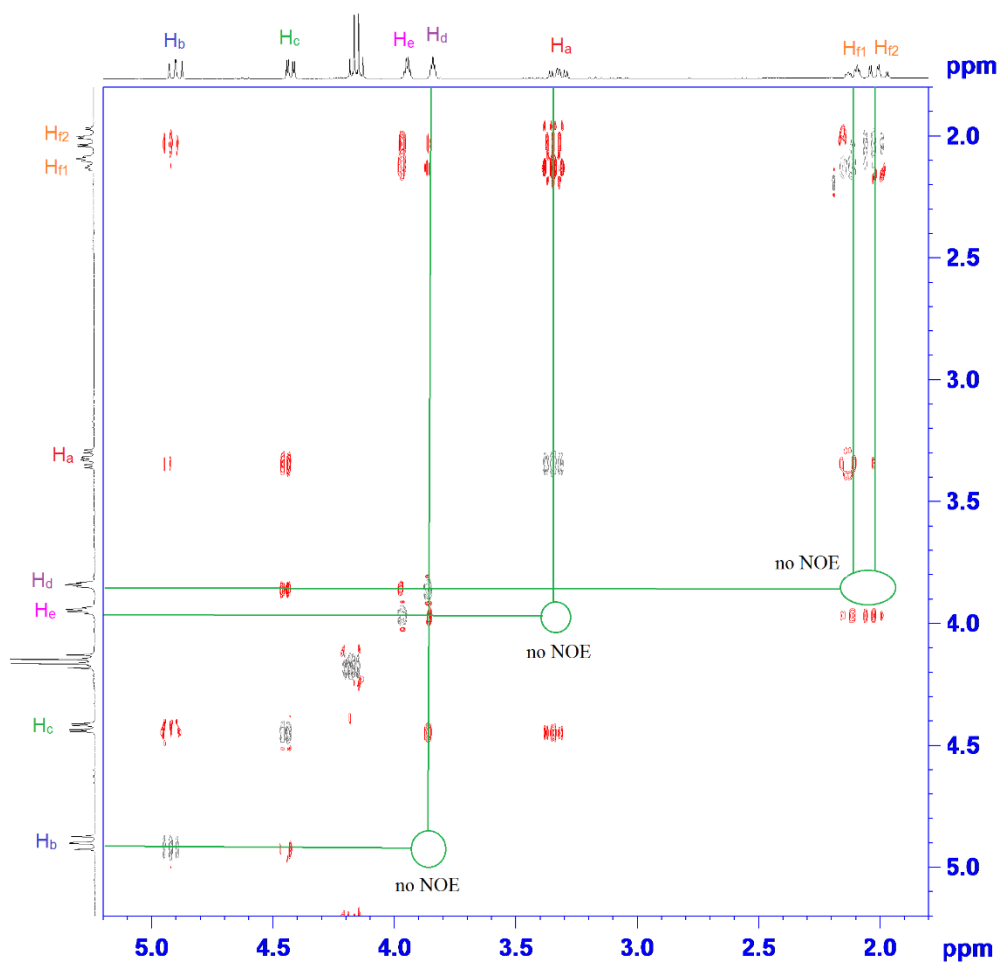



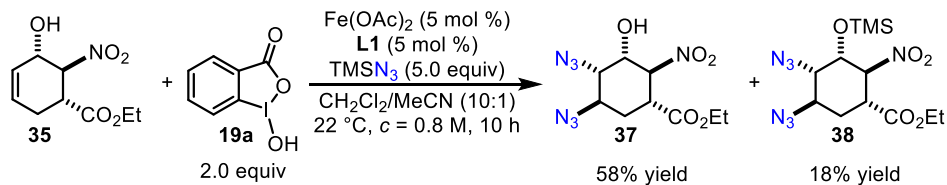

To a flame-dried sealable 2-dram vial equipped with a stir bar were added  $\text{Fe}(\text{OAc})_2$  (8.7 mg, 0.05 mmol, 5 mol %), **L1** (13.7 mg, 0.05 mmol, 5 mol %), **35** (215 mg, 1.0 mmol, 1.0 equiv) and benziodoxole **19a** (528 mg, 2.0 mmol, 2.0 equiv). After the flask was evacuated and backfilled with  $\text{N}_2$  three times, anhydrous  $\text{CH}_2\text{Cl}_2$  (1.1 mL) and MeCN (0.11 mL) were added via syringes and the mixture was stirred at room temperature for 10 min. Subsequently, freshly opened  $\text{TMSN}_3$  (656  $\mu\text{L}$ , 5.0 mmol, 5.0 equiv) was added to the flask at room temperature within 8 h using a syringe pump. The reaction mixture was stirred for additional 2 h until **35** was fully consumed (monitored by TLC). The reaction was carefully quenched with saturated  $\text{NaHCO}_3$  solution (3 mL) to remove any residual hydrazoic acid and further diluted with  $\text{Et}_2\text{O}$  (8 mL), the resulting suspension was stirred vigorously for 10 min. The mixture was filtered and the solid was washed with  $\text{Et}_2\text{O}$  (5 mL $\times$ 2). The combined filtrate was washed with saturated  $\text{NaHCO}_3$  solution (10 mL), brine (10 mL) and dried over  $\text{Na}_2\text{SO}_4$ . After concentration *in vacuo*, the residue was purified through column chromatography (hexanes/ $\text{EtOAc}$ : from 100:1 to 3:1) to afford the *O*-TMS protected diazidation product **38** as colorless oil (67 mg, 18% yield) along with the desired diazidation product **37** as colorless oil (174 mg, 58% yield).

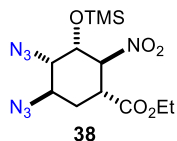

( $\pm$ )-Ethyl (1*R*,2*S*,3*S*,4*S*,5*R*)-4,5-diazo-2-nitro-3-((trimethylsilyl)oxy)cyclohexane-1-carboxylate (**38**): IR  $\nu_{\text{max}}$  (neat)/ $\text{cm}^{-1}$ : 2962 (w), 2095 (s), 1719 (s), 1554 (s), 1247 (s), 1204 (m), 1111 (s), 1025 (m), 842 (s), 751 (m);  $^1\text{H}$  NMR (400 MHz,  $\text{CDCl}_3$ )  $\delta$  4.89 (dd,  $J = 11.2, 9.8$  Hz, 1H), 4.44 (dd,  $J = 9.7, 3.3$  Hz, 1H), 4.16 (q,  $J = 7.1$  Hz, 2H), 3.93 (q,  $J = 3.3$  Hz, 1H), 3.78 (t,  $J = 3.3$  Hz, 1H), 3.32 (ddd,  $J = 12.7, 11.4, 4.4$  Hz, 1H), 2.10 (dt,  $J = 6.7, 3.8$  Hz, 1H), 2.03–1.93 (m, 1H), 1.24 (t,  $J = 7.2$  Hz, 3H), 0.13 (s, 9H);  $^{13}\text{C}$  NMR (100 MHz,  $\text{CDCl}_3$ )  $\delta$  170.0, 87.2, 71.2,

63.7, 61.9, 58.5, 40.6, 26.3, 13.9, -0.5; LRMS (ESI, m/z): calcd for  $C_{12}H_{21}N_7O_5SiNa^+$ ,  $[M + Na^+]$ , 394.1, found 394.1.

The full assignment of  $^1H$  NMR of **38** was carried out through  $^1H$ - $^1H$  COSY NMR analysis: there are strong correlations between  $H_e$  and  $H_{f1}/H_{f2}$ ,  $H_e$  and  $H_d$ , as well as  $H_d$  and  $H_c$ .

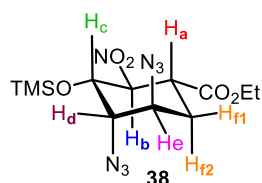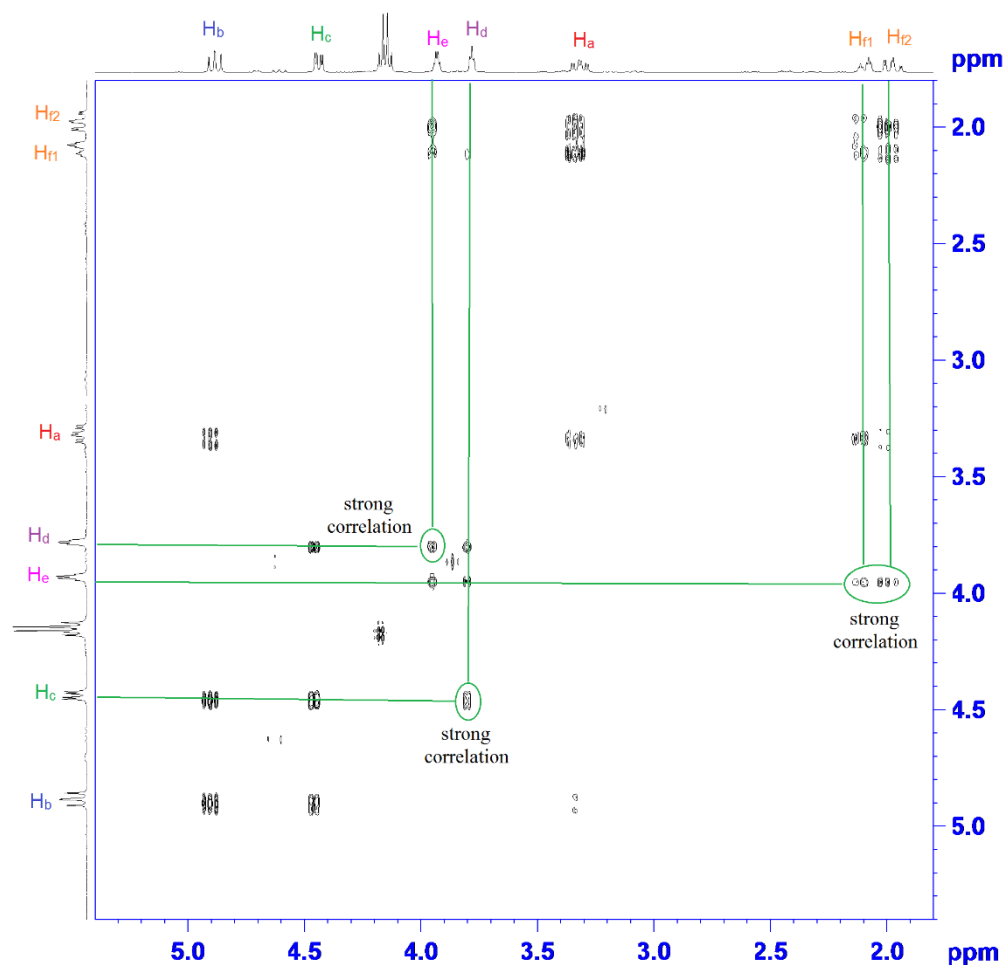

The stereochemistry of **38** was determined by *NOE* analysis: there is no significant *NOE* observed between H<sub>a</sub> and H<sub>c</sub>, H<sub>d</sub> and H<sub>b</sub>, or H<sub>d</sub> and H<sub>f</sub>. (See below)

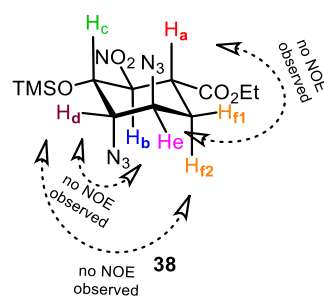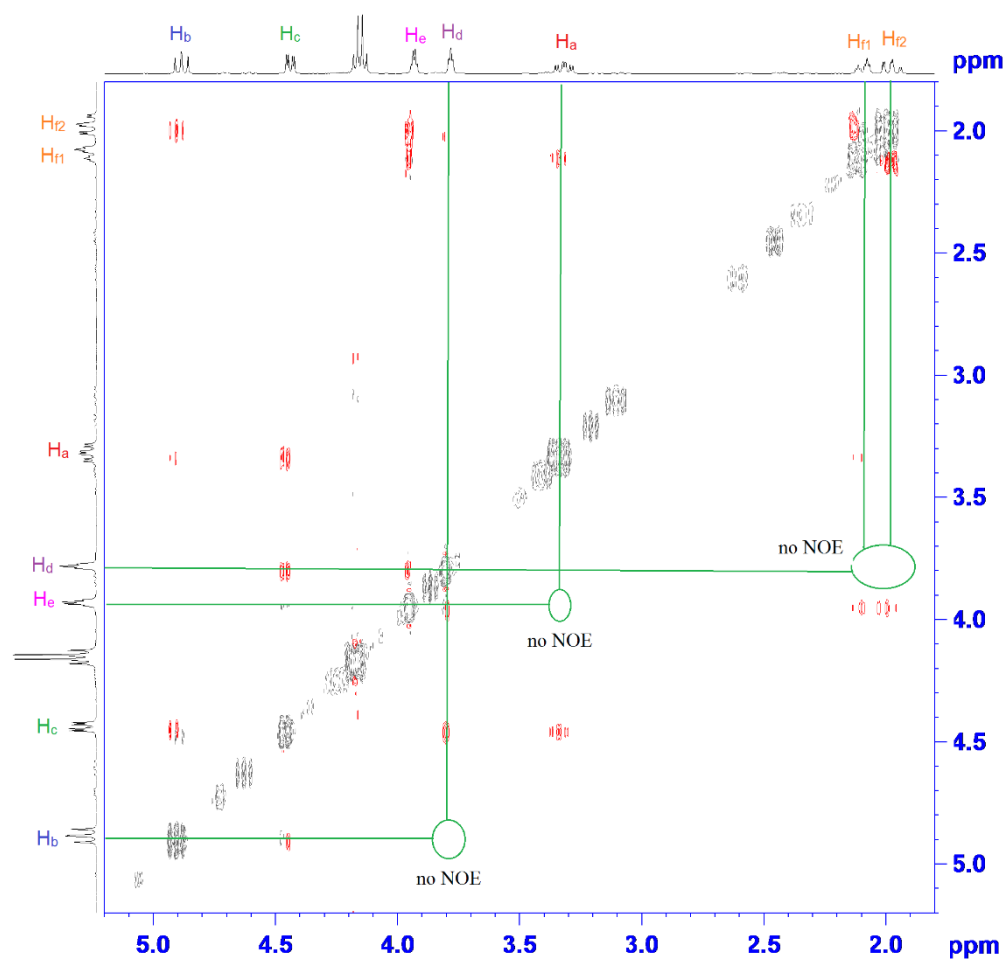

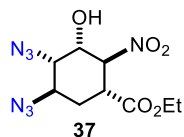

**(±)-Ethyl (1R,2S,3S,4S,5R)-4,5-diazido-3-hydroxy-2-nitrocyclohexane-1-carboxylate (37):**

IR  $\nu_{\max}$  (neat)/ $\text{cm}^{-1}$ : 3433 (w), 3406 (w), 2099 (s), 1718 (s), 1556 (s), 1296 (m), 1236 (s), 1196 (s), 1080 (s), 1020 (m), 896 (m);  $^1\text{H}$  NMR (400 MHz,  $\text{CDCl}_3$ )  $\delta$  4.90–4.81 (m, 1H), 4.45–4.37 (m, 1H), 4.17 (q,  $J = 7.1$  Hz, 2H), 4.06–3.98 (m, 2H), 3.36–3.25 (m, 1H), 3.10 (d,  $J = 5.8$  Hz, 1H), 2.18–2.08 (m, 1H), 2.08–1.96 (m, 1H), 1.25 (t,  $J = 7.1$  Hz, 3H);  $^{13}\text{C}$  NMR (100 MHz,  $\text{CDCl}_3$ )  $\delta$  170.4, 86.6, 69.4, 63.4, 62.1, 58.4, 40.3, 26.6, 13.9; LRMS (ESI,  $m/z$ ): calcd for  $\text{C}_9\text{H}_{13}\text{N}_7\text{O}_5\text{Na}^+$ ,  $[\text{M} + \text{Na}^+]$ , 322.1, found 322.1.

The full assignment of  $^1\text{H}$  NMR of **37** was carried out through  $^1\text{H}$ – $^1\text{H}$  COSY NMR analysis: there are strong correlations between  $\text{H}_e$  and  $\text{H}_{f1}/\text{H}_{f2}$ ,  $\text{H}_e$  and  $\text{H}_d$ , as well as  $\text{H}_d$  and  $\text{H}_c$ .

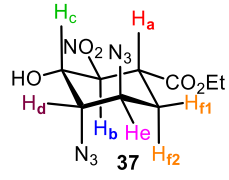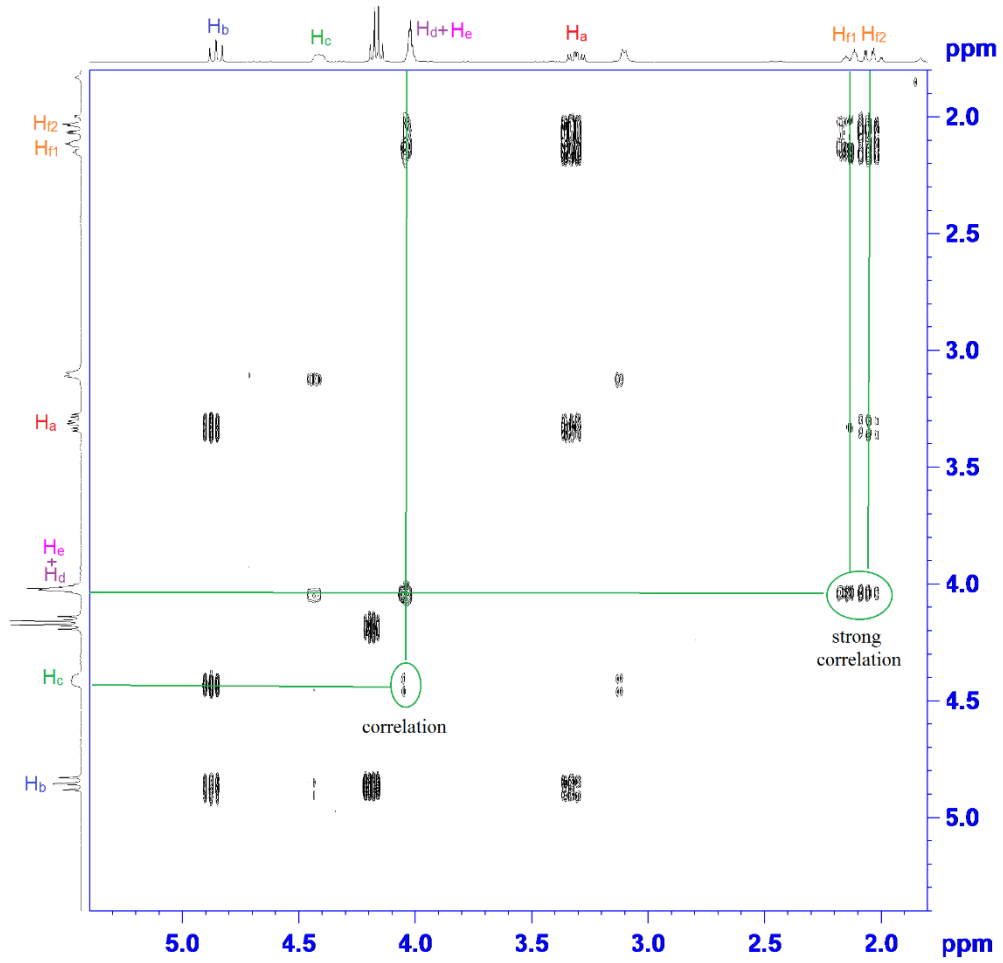

The stereochemistry of **37** was determined by *NOE* analysis: there is no significant *NOE* observed either between  $H_a$  and  $H_e$  or  $H_d$  and  $H_b$ .

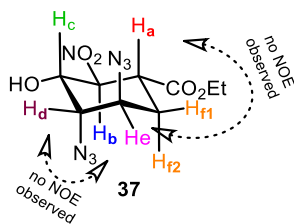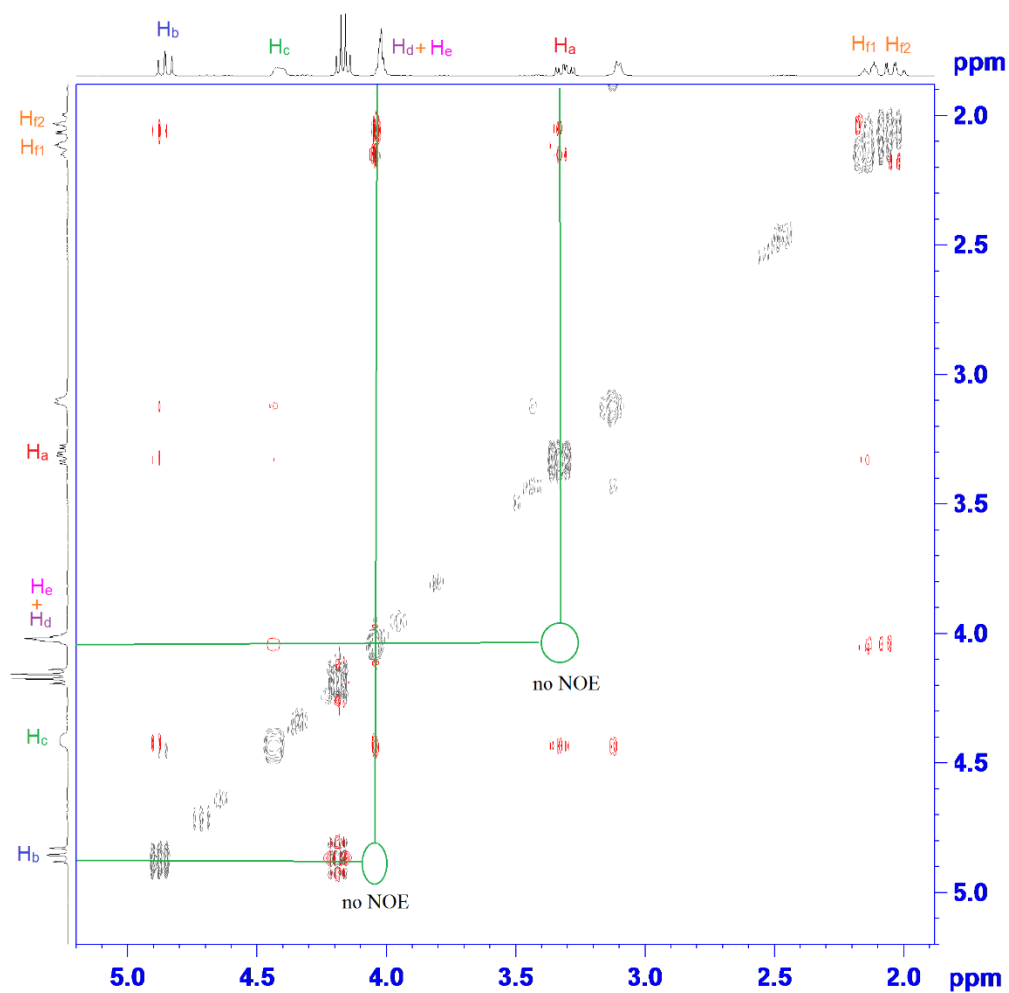

## G. Catalyst Structure–Reactivity Relationship Studies

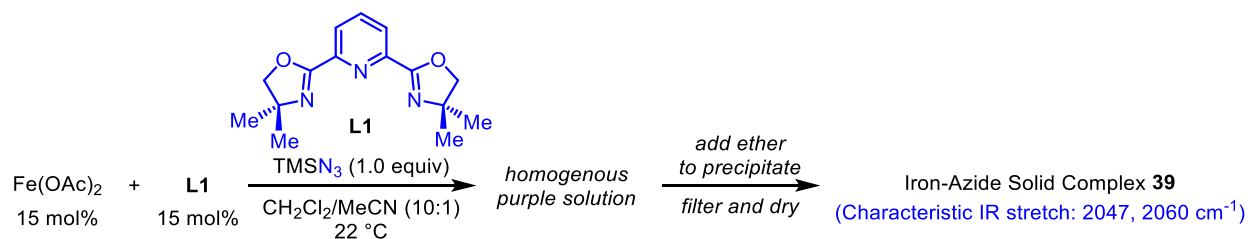

To a flame-dried 20 mL sealable test tube equipped with a stir bar were added  $\text{Fe}(\text{OAc})_2$  (87 mg, 0.5 mmol, 15 mol%) and ligand **L1** (137 mg, 0.5 mmol, 15 mol%). After the tube was evacuated and backfilled with  $\text{N}_2$  three times, anhydrous  $\text{CH}_2\text{Cl}_2$  (8.0 mL) and MeCN (1.0 mL) were added via a syringe and the mixture was stirred at room temperature for 10 min.  $\text{TMSN}_3$  (0.45 mL, 3.3 mmol, 1.0 equiv) was added to the catalyst solution and the mixture was stirred for additional 0.5 h. Ether (8 mL) was added drop-wise to the above solution while stirring and purple suspension started to precipitate out. The mixture was centrifuged and the supernatant was removed via a syringe. The solid residue was washed with ether (15 mL) and separated from the liquid by centrifuge. After  $\text{Et}_2\text{O}$  was removed via a syringe, the solid residue was further dried *in vacuo* to afford **39** as a purple solid (99 mg). The IR analysis of **39** shows characteristic azido-group absorption at 2047  $\text{cm}^{-1}$  and 2060  $\text{cm}^{-1}$ .

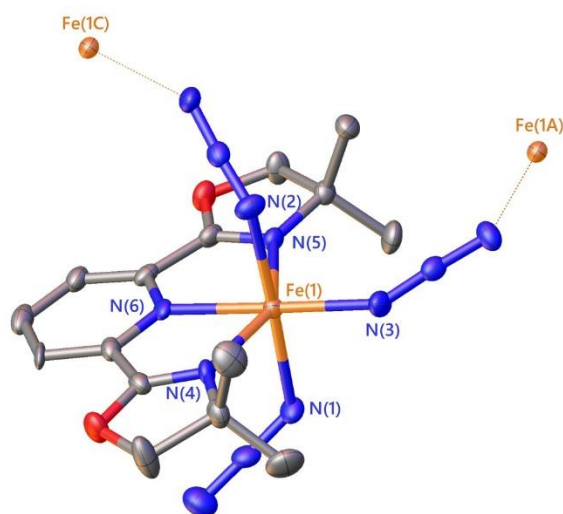

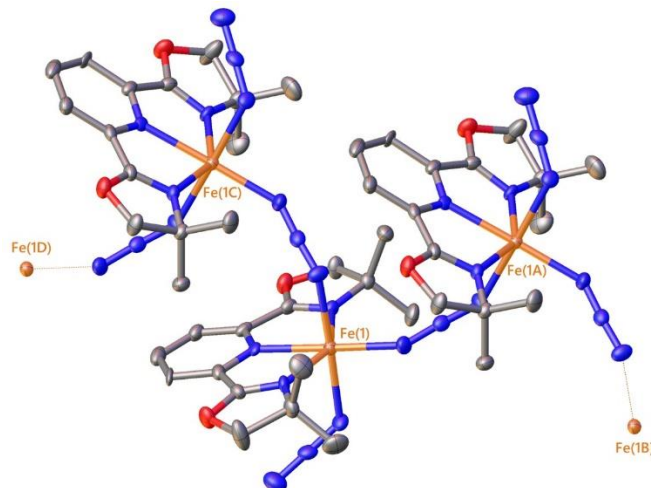

**Figure S3.** Solid-state structure of both the monomeric unit and the polymeric state of **39**. Solvate ( $\text{CH}_2\text{Cl}_2$ ) and hydrogen atoms have been omitted for clarity. Ellipsoids are depicted at the 50% level.

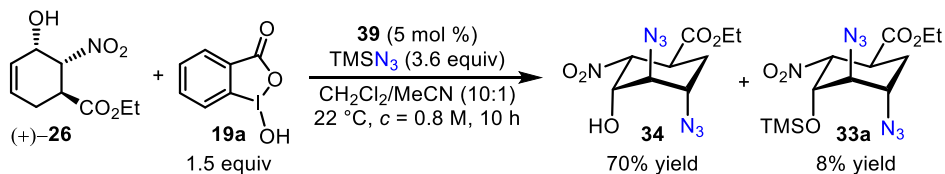

To a flame-dried sealable 2-dram vial equipped with a stir bar were added the solid catalyst **39** (23 mg, 0.05 mmol, 5 mol %), (+)-**26** (215 mg, 1.0 mmol, 1.0 equiv) and benziodoxole **19a** (396 mg, 1.5 mmol, 1.5 equiv). After the flask was evacuated and backfilled with  $\text{N}_2$  three times, anhydrous  $\text{CH}_2\text{Cl}_2$  (1.1 mL) and MeCN (0.11 mL) were added via syringes and the mixture was stirred at room temperature for 10 min. Subsequently, freshly opened  $\text{TMSN}_3$  (473  $\mu\text{L}$ , 3.6 mmol, 3.6 equiv) was added to the flask at room temperature within 8 h using a syringe pump. The reaction mixture was stirred for additional 2 h until (+)-**26** was fully consumed (monitored by TLC). The reaction was carefully quenched with saturated  $\text{NaHCO}_3$  solution (3 mL) to remove any residual hydrazoic acid and further diluted with  $\text{Et}_2\text{O}$  (8 mL), the resulting suspension was stirred vigorously for 10 min. The mixture was filtered and the solid was washed with  $\text{Et}_2\text{O}$  (5 mL $\times$ 2). The combined filtrate was washed with saturated  $\text{NaHCO}_3$  solution (10 mL), brine (10 mL) and dried over  $\text{Na}_2\text{SO}_4$ . After concentration *in vacuo*, the residue was purified through column chromatography (hexanes/ $\text{EtOAc}$ : from 20:1 to 6:1) to



afford the desired product **34** as colorless oil (209 mg, 70% yield) along with the *O*-TMS protected diazidation product **33a** as colorless oil (30 mg, 8% yield).

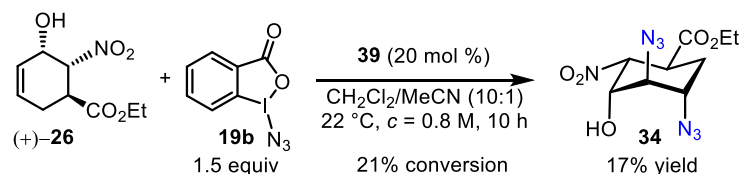

To a flame-dried sealable 2-dram vial equipped with a stir bar were added the solid catalyst **39** (90 mg, 0.2 mmol, 20 mol %), (+)-**26** (215 mg, 1.0 mmol, 1.0 equiv) and **19b** (434 mg, 1.5 mmol, 1.5 equiv). After the flask was evacuated and backfilled with N<sub>2</sub> three times, anhydrous CH<sub>2</sub>Cl<sub>2</sub> (1.1 mL) and MeCN (0.11 mL) were added via syringes and the mixture was stirred at room temperature for 10 h. The reaction was quenched with saturated NaHCO<sub>3</sub> solution (1 mL) and further diluted with Et<sub>2</sub>O (8 mL), the resulting suspension was stirred vigorously for 10 min. The mixture was filtered and the solid was washed with Et<sub>2</sub>O (5 mL×2). The combined filtrate was washed with saturated NaHCO<sub>3</sub> solution (10 mL), brine (10 mL) and dried over Na<sub>2</sub>SO<sub>4</sub>. After concentration *in vacuo*, the residue was purified through column chromatography (hexanes/EtOAc: from 20:1 to 6:1) to afford the desired product **34** as colorless oil (51 mg, 17% yield) along with the recovered starting material (+)-**26**.

## H. Expedient Tamiflu Synthesis from 3·2TsOH and Related Synthetic Explorations

### a. Expedient Tamiflu Synthesis from 3·2TsOH

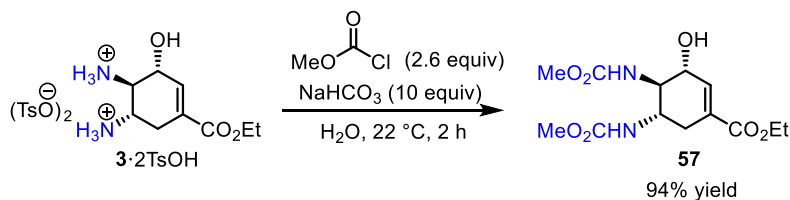

To a 100 mL round bottom flask with a stir bar were added **3·2TsOH** (5.36 g, 9.85 mmol, 1.0 equiv) and H<sub>2</sub>O (60 mL). After the flask cooled to 0 °C, NaHCO<sub>3</sub> (8.3 g, 98.5 mmol, 10 equiv) was carefully added portion-wise. The resulting solution was stirred at 0 °C for 5 min and methyl chloroformate (1.98 mL, 25.6 mmol, 2.6 equiv) was added. The mixture was warmed up to room temperature and stirred for additional 2 h. EtOAc was added to the reaction mixture. The organic phase was separated from the aqueous phase and the aqueous phase was further extracted with EtOAc (30 mL×3). The combined organic phase was dried over Na<sub>2</sub>SO<sub>4</sub>. After concentration *in vacuo*, the residue was purified through column chromatography (hexanes/EtOAc: from 50:1 to 2:1) to afford the desired product **57** as a white solid (2.93 g, 94% yield, m.p. 58–59 °C).

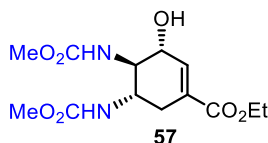

**Ethyl (3R,4R,5S)-4,5-bis((ethoxycarbonyl)amino)-3-hydroxycyclohex-1-ene-1-carboxylate (57):**  $[\alpha]_D^{20} = -26.7^\circ$  (*c* 0.325, CHCl<sub>3</sub>). IR  $\nu_{\text{max}}$  (neat)/cm<sup>-1</sup>: 3319 (m), 2981 (w), 1692 (s), 1533 (s), 1447 (w), 1372 (w), 1239 (s), 1039 (s), 986 (m), 861 (m); <sup>1</sup>H NMR (400 MHz, CDCl<sub>3</sub>)  $\delta$  6.76 (s, 1H), 5.92 (d, *J* = 8.6 Hz, 1H), 5.69 (d, *J* = 8.9 Hz, 1H), 4.29–4.28 (m, 1H), 4.26–4.21 (m, 1H), 4.15 (q, *J* = 7.1 Hz, 2H), 3.82–3.71 (m, 1H), 3.61 (s, 3H), 3.60 (s, 3H), 3.59–3.53 (m, 1H), 2.79 (dd, *J* = 17.5, 5.1 Hz, 1H), 2.30–2.18 (m, 1H), 1.24 (t, *J* = 7.1 Hz, 3H); <sup>13</sup>C NMR (100 MHz, CDCl<sub>3</sub>)  $\delta$  166.0, 158.9, 157.7, 139.1, 128.7, 71.5, 61.0, 58.8, 52.5, 52.4, 49.9, 31.3, 14.1; LRMS (ESI, *m/z*): calcd for C<sub>13</sub>H<sub>21</sub>N<sub>2</sub>O<sub>7</sub><sup>+</sup>, [M + H<sup>+</sup>], 317.1, found 317.1.

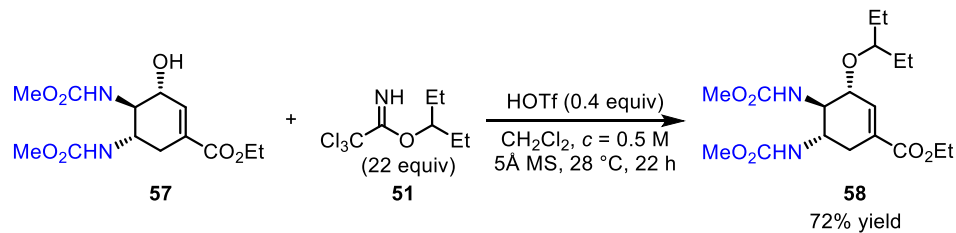

To an oven-dried 50 mL round bottom flask equipped with a stir bar were added **57** (1.38 g, 4.36 mmol, 1.0 equiv) and 5 Å molecular sieves powder (1.5 g). After the flask was evacuated and backfilled with N<sub>2</sub> twice, anhydrous CH<sub>2</sub>Cl<sub>2</sub> (9.0 mL) and freshly distilled pentan-3-yl 2,2,2-trichloroacetimidate **51** (16.7 mL, 96.0 mmol, 22 equiv) were added. The reaction was cooled to 0 °C and TfOH (154 μL, 1.74 mmol, 0.4 equiv) was added. After the addition of TfOH, the reaction mixture was warmed up to 28 °C and stirred at this temperature for 22 h until **57** was fully consumed (monitored by TLC). The mixture was cooled to 0 °C, and Et<sub>3</sub>N (0.6 mL, 4.36 mmol, 1.0 equiv) in CH<sub>2</sub>Cl<sub>2</sub> (10 mL) was added to quench the reaction. The mixture was filtered and the solid was washed with CH<sub>2</sub>Cl<sub>2</sub> (10 mL×4). The filtrate was concentrated *in vacuo* and the residue was purified through column chromatography (hexanes/EtOAc: from 30:1 to 2:1) to afford the desired product **58** as a white solid (1.21 g, 72% yield, m.p. 95–96 °C).

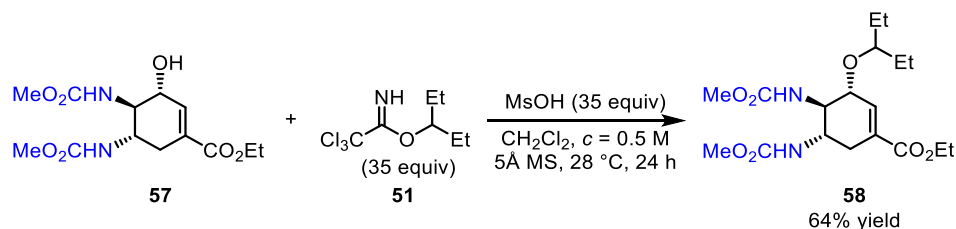

To an oven-dried 25 mL round bottom flask equipped with a stir bar were added **57** (158 mg, 0.5 mmol, 1.0 equiv) and 5 Å molecular sieves powder (200 mg). After the flask was evacuated and backfilled with N<sub>2</sub> twice, anhydrous CH<sub>2</sub>Cl<sub>2</sub> (1.0 mL) and freshly distilled pentan-3-yl 2,2,2-trichloroacetimidate **51** (3.1 mL, 17.5 mmol, 35 equiv) were added. The reaction was cooled to 0 °C and MsOH (1.15 mL, 17.5 mmol, 35 equiv) was added in 3 h using a syringe pump. After the addition of MsOH, the reaction mixture was warmed up to 28 °C and stirred at this temperature for 24 h. The mixture was filtered and the solid was washed with CH<sub>2</sub>Cl<sub>2</sub> (5 mL×4). The filtrate was concentrated *in vacuo* and the residue was purified through column chromatography (hexanes/EtOAc: from 30:1 to 2:1) to afford the desired product **58** as a white solid (124 mg, 64% yield, m.p. 95–96 °C).

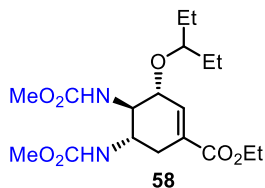

**Ethyl (3R,4R,5S)-4,5-bis((methoxycarbonyl)amino)-3-(pentan-3-yloxy)cyclohex-1-ene-1-carboxylate (58):**  $[\alpha]_D^{20} = -54.6^\circ$  (*c* 0.85, CHCl<sub>3</sub>). IR  $\nu_{\max}$  (neat)/cm<sup>-1</sup>: 3313 (m), 2921 (s), 1697 (s), 1544 (m), 1286 (m), 1231 (m), 1058 (m); <sup>1</sup>H NMR (400 MHz, CDCl<sub>3</sub>)  $\delta$  6.78 (s, 1H), 5.50 (s, 1H), 4.86 (d, *J* = 8.4 Hz, 1H), 4.19 (q, *J* = 6.7 Hz, 2H), 4.06–3.9 (m, 1H), 3.90–3.88 (m, 1H), 3.80–3.75 (m, 1H), 3.65 (s, 3H), 3.63 (s, 3H), 3.39 (quint, *J* = 5.6 Hz, 1H), 2.72 (dd, *J* = 17.1, 4.8 Hz, 1H), 2.36 (dd, *J* = 18.4, 8.0 Hz, 1H), 1.56–1.48 (m, 4H), 1.27 (t, *J* = 7.2 Hz, 3H), 0.91–0.86 (m, 6H); <sup>13</sup>C NMR (100 MHz, CDCl<sub>3</sub>)  $\delta$  166.0, 157.5, 157.1, 136.8, 129.3, 82.4, 77.2, 75.1, 60.9, 55.2, 52.3, 52.1, 49.5, 30.4, 26.1, 25.7, 14.1, 9.3, 9.2; LRMS (ESI, *m/z*): calcd for C<sub>18</sub>H<sub>31</sub>N<sub>2</sub>O<sub>7</sub><sup>+</sup>, [M + H<sup>+</sup>], 387.2, found 387.2.

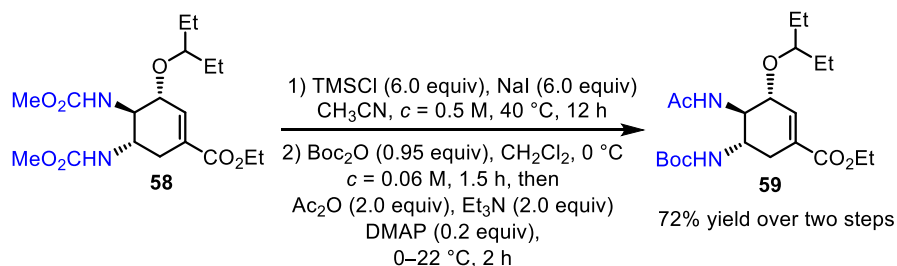

To a flame-dried 50 mL round bottom flask equipped with a stir bar were **58** (1.0 g, 2.6 mmol, 1.0 equiv) and anhydrous NaI (2.34 g, 15.6 mmol, 6.0 equiv). After this flask was evacuated and backfilled with N<sub>2</sub> twice, anhydrous MeCN (5.2 mL) was added followed by drop-wise addition of freshly distilled TMSCl (1.98 mL, 15.6 mmol, 6.0 equiv) via a syringe. The mixture was warmed up to 40 °C and stirred at this temperature for 12 h in dark. The reaction was cooled down to 0 °C and diluted with CH<sub>2</sub>Cl<sub>2</sub> (30 mL). Saturated Na<sub>2</sub>CO<sub>3</sub> solution (10 mL), H<sub>2</sub>O (5 mL) and saturated Na<sub>2</sub>S<sub>2</sub>O<sub>3</sub> solution (2 mL) were added and the mixture was stirred for additional 5 min. The organic phase was separated from the aqueous phase and the aqueous phase was further extracted with CH<sub>2</sub>Cl<sub>2</sub> (80 mL×3). The combined organic phase was washed with water (10 mL×2), brine (10 mL) and dried over Na<sub>2</sub>SO<sub>4</sub>. After concentration *in vacuo*, the crude diamine product will be used directly in the next step without further purification.

To an oven-dried 100 mL round bottom flask equipped with a stir bar was added the crude diamine product obtained in last step. The flask was evacuated and backfilled with N<sub>2</sub> twice and then anhydrous CH<sub>2</sub>Cl<sub>2</sub> (40 mL) was added. Subsequently, a solution of Boc<sub>2</sub>O (546 mg, 2.5 mmol, 0.95 equiv) in CH<sub>2</sub>Cl<sub>2</sub> (2 mL) was added to the flask at 0 °C within 40 min using a syringe pump. The mixture was warmed up to room temperature and stirred for additional 1 h (monitored by TLC until the diamine starting material was consumed). Et<sub>3</sub>N (0.72 mL, 5.2 mmol, 2.0 equiv), Ac<sub>2</sub>O (0.49 mL, 5.2 mmol, 2.0 equiv) and a solution of DMAP (64 mg, 0.5 mmol, 0.2 equiv) in CH<sub>2</sub>Cl<sub>2</sub> (0.5 mL) were added to the above mixture at 0 °C. The reaction mixture was warmed up to room temperature and kept stirring for additional 2 h until the intermediate was consumed (monitored by TLC). Saturated NaHCO<sub>3</sub> solution (10 mL) was added to quench the reaction. The organic phase was separated from the aqueous phase and the aqueous phase was extracted with CH<sub>2</sub>Cl<sub>2</sub> (30 mL×2). The combined organic phase was washed with brine (10 mL) and dried over Na<sub>2</sub>SO<sub>4</sub>. After concentration *in vacuo*, the residue was purified through column chromatography (hexanes/EtOAc: from 30:1 to 2:1) to afford the desired product **59** as a white solid (772 mg, 72% yield over two steps, m.p. 141–142 °C).

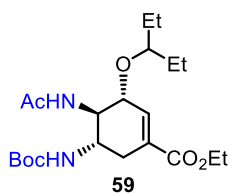

**Ethyl (3R,4R,5S)-4-acetamido-5-((tert-butoxycarbonyl)amino)-3-(pentan-3-yloxy)cyclohex-1-ene-1-carboxylate (59):**  $[\alpha]_{\text{D}}^{20} = -77.0^{\circ}$  (*c* 1.06, CHCl<sub>3</sub>). IR  $\nu_{\text{max}}$  (neat)/cm<sup>-1</sup>: 3313 (m), 2971 (m), 2932 (m), 1681 (s), 1654 (s), 1544 (m), 1297 (m), 1242 (s), 1051 (m), 1013 (m), 943 (m), 733(m); <sup>1</sup>H NMR (400 MHz, CDCl<sub>3</sub>)  $\delta$  6.78 (s, 1H), 5.89 (d, *J* = 9.0 Hz, 1H), 5.17 (d, *J* = 9.1 Hz, 1H), 4.25–4.15 (m, 2H), 4.06 (dd, *J* = 18.5, 9.0 Hz, 1H), 3.97–3.95 (m, 1H), 3.78 (qd, *J* = 9.7, 5.4 Hz, 1H), 3.36 (quint, *J* = 5.6 Hz, 1H), 2.73 (dd, *J* = 17.8, 5.0 Hz, 1H), 2.43–2.20 (m, 1H), 1.97 (s, 3H), 1.62–1.45 (m, 4H), 1.41 (s, 9H), 1.28 (t, *J* = 7.1 Hz, 3H), 0.89–0.81 (m, 6H); <sup>13</sup>C NMR (100 MHz, CDCl<sub>3</sub>)  $\delta$  170.8, 166.0, 156.3, 137.6, 129.3, 82.2, 79.7, 75.9, 61.0, 54.4, 49.0, 30.9, 28.3, 26.1, 25.7, 23.4, 14.2, 9.5, 9.2; LRMS (ESI, *m/z*): calcd for C<sub>21</sub>H<sub>37</sub>N<sub>2</sub>O<sub>6</sub><sup>+</sup>, [M + H<sup>+</sup>], 413.3, found 413.3.

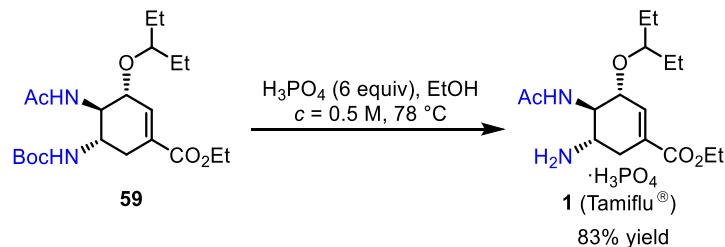

To an oven-dried 10 mL round bottom flask equipped with a stir bar was added **59** (1.21 g, 2.9 mmol). The flask was evacuated and backfilled with  $\text{N}_2$  twice and then EtOH (4 mL) was added. Subsequently,  $\text{H}_3\text{PO}_4$  (1.08 mL, 17.6 mmol, 6.0 equiv) in EtOH (1.8 mL) was added to the flask at room temperature using a syringe. The mixture was warmed up to  $78 \text{ }^\circ\text{C}$  and stirred for additional 12 h (monitored by TLC until the starting material was consumed). The mixture was then cooled to  $0 \text{ }^\circ\text{C}$  and stirred for 3 h with precipitates generated. The reaction mixture was filtered and the solid was washed with cold acetone (2.0 mL $\times$ 3). The solid was collected and dried *in vacuo* to afford the desired product **1** (Tamiflu) as a white solid (1.0 g, 83% yield, m.p.  $188\text{--}190 \text{ }^\circ\text{C}$ ).

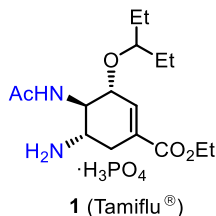

**Ethyl (3R,4R,5S)-4-acetamido-5-amino-3-(pentan-3-yloxy) cyclohex-1-ene-1-carboxylate (Tamiflu, 1):**  $[\alpha]_{\text{D}}^{20} = -30^\circ$  ( $c$  1.01,  $\text{H}_2\text{O}$ ). IR  $\nu_{\text{max}}$  (neat)/ $\text{cm}^{-1}$ : 3347 (m), 3169 (br), 2966 (w), 2937 (w), 2874 (w), 1716 (s), 1656 (s), 1549 (s), 1243 (s), 1120 (s), 952 (s), 850 (m);  $^1\text{H}$  NMR (400 MHz,  $\text{D}_2\text{O}$ )  $\delta$  6.85 (s, 1H), 4.33 (d,  $J = 8.8 \text{ Hz}$ , 1H), 4.25 (dt,  $J = 7.2, 5.3 \text{ Hz}$ , 2H), 4.05 (dd,  $J = 11.6, 8.8 \text{ Hz}$ , 1H), 3.62–3.53 (m, 2H), 2.96 (dd,  $J = 17.0, 5.6 \text{ Hz}$ , 1H), 2.55–2.45 (m, 1H), 2.08 (s, 3H), 1.60–1.40 (m, 4H), 1.28 (t,  $J = 7.1 \text{ Hz}$ , 3H), 0.90–0.76 (m, 6H);  $^{13}\text{C}$  NMR (100 MHz,  $\text{D}_2\text{O}$ )  $\delta$  175.2, 167.3, 137.9, 127.5, 84.2, 75.0, 62.3, 52.6, 49.0, 28.1, 25.4, 25.0, 22.3, 13.2, 8.5, 8.4; LRMS (ESI,  $m/z$ ): calcd for  $\text{C}_{16}\text{H}_{29}\text{N}_2\text{O}_4^+$ ,  $[\text{M} - \text{H}_3\text{PO}_4 + \text{H}^+]$ , 313.2, found 313.2.

## b. Related Synthetic Explorations

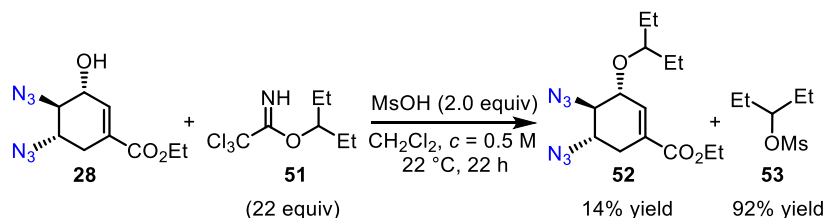

To an oven-dried 25 mL round bottom flask equipped with a stir bar were added **28** (504 mg, 2.0 mmol, 1.0 equiv) and 5 Å molecular sieves powder (500 mg). After the flask was evacuated and backfilled with  $\text{N}_2$  twice, anhydrous  $\text{CH}_2\text{Cl}_2$  (4.0 mL) and freshly distilled pentan-3-yl 2,2,2-trichloroacetimidate **51** (7.7 mL, 44 mmol, 22 equiv) were added. The reaction was cooled to 0 °C and MsOH (260  $\mu\text{L}$ , 4.0 mmol, 2.0 equiv) was added. After the addition of MsOH, the reaction mixture was warmed up to 22 °C and stirred at this temperature for 22 h. The mixture was cooled to 0 °C, and  $\text{Et}_3\text{N}$  (0.28 mL, 2.0 mmol, 1.0 equiv) in  $\text{CH}_2\text{Cl}_2$  (5 mL) was added to quench the reaction. The mixture was filtered and the solid was washed with  $\text{CH}_2\text{Cl}_2$  (7 mL $\times$ 4). The filtrate was concentrated *in vacuo* and the residue was purified through column chromatography (hexanes/ $\text{EtOAc}$ : from 100:1 to 10:1) to afford the desired product **52** as colorless oil (90 mg, 14% yield) along with the side product **53** as colorless oil (306 mg, 92% yield) which is a known compound.<sup>9</sup>

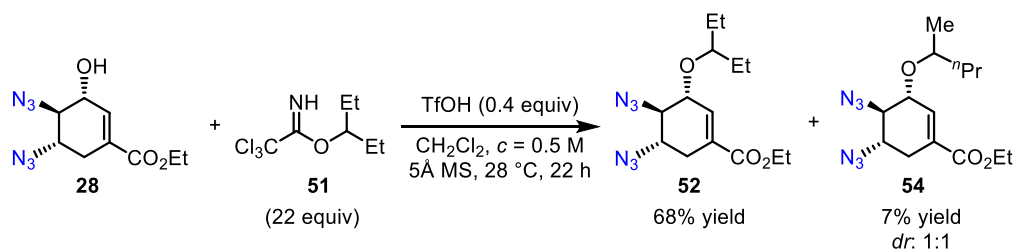

To an oven-dried 25 mL round bottom flask equipped with a stir bar were added **28** (504 mg, 2.0 mmol, 1.0 equiv) and 5 Å molecular sieves powder (500 mg). After the flask was evacuated and backfilled with  $\text{N}_2$  twice, anhydrous  $\text{CH}_2\text{Cl}_2$  (4.0 mL) and freshly distilled pentan-3-yl 2,2,2-trichloroacetimidate **51** (7.7 mL, 44 mmol, 22 equiv) were added. The reaction was cooled to 0 °C and TfOH (71  $\mu\text{L}$ , 0.8 mmol, 0.4 equiv) was added. After the addition of TfOH, the reaction mixture was warmed up to 28 °C and stirred at this temperature for 22 h until **28** was

fully consumed (monitored by TLC). The mixture was cooled to 0 °C, and Et<sub>3</sub>N (0.28 mL, 2.0 mmol, 1.0 equiv) in CH<sub>2</sub>Cl<sub>2</sub> (5 mL) was added to quench the reaction. The mixture was filtered and the solid was washed with CH<sub>2</sub>Cl<sub>2</sub> (7 mL×4). The filtrate was concentrated *in vacuo* and the residue was purified through column chromatography (hexanes/EtOAc: from 100:1 to 10:1) to afford an inseparable mixture of **52** and **54** as colorless oil (484 mg, 75% yield, **52**:**54** = 10:1).

Note: in order to confirm the structure of **54**, it was independently synthesized from **S3**. The conversion from **52** to **54** under the reaction condition was corroborated by a TfOH-catalyzed control experiment.

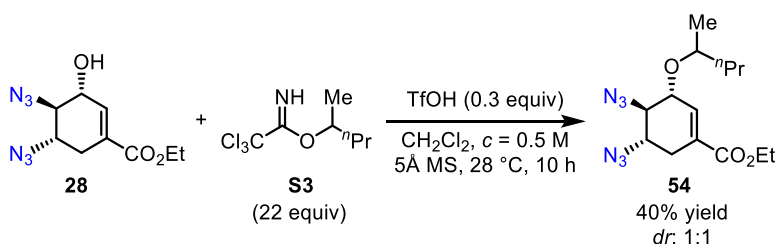

To a flame-dried sealable 3-dram vial equipped with a stir bar were added **28** (252 mg, 1.0 mmol, 1.0 equiv) and 5 Å molecular sieves powder (250 mg). After the flask was evacuated and backfilled with N<sub>2</sub> twice, anhydrous CH<sub>2</sub>Cl<sub>2</sub> (2.0 mL) and freshly distilled pentan-2-yl 2,2,2-trichloroacetimidate **S3** (3.84 mL, 22 mmol, 22 equiv) were added. The reaction was cooled to 0 °C and TfOH (27 μL, 0.3 mmol, 0.3 equiv) was added. After the addition of TfOH, the reaction mixture was warmed up to 28 °C and stirred at this temperature for 10 h. The mixture was cooled to 0 °C, and Et<sub>3</sub>N (0.14 mL, 1.0 mmol, 1.0 equiv) in CH<sub>2</sub>Cl<sub>2</sub> (3 mL) was added to quench the reaction. The mixture was filtered and the solid was washed with CH<sub>2</sub>Cl<sub>2</sub> (5 mL×4). The filtrate was concentrated *in vacuo* and the residue was purified through column chromatography (hexanes/EtOAc: from 100:1 to 10:1) to afford the product **54** as colorless oil (129 mg, 40% yield, *dr.* 1:1).

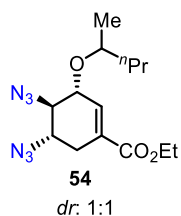





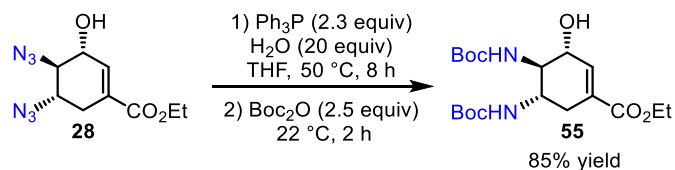

To a 50 mL round bottom flask with a stir bar was added **28** (504 mg, 2.0 mmol, 1.0 equiv). After the flask was evacuated and backfilled with N<sub>2</sub> twice, THF (15 mL) and H<sub>2</sub>O (0.72 mL, 40 mmol, 20 equiv) were added via syringes. Subsequently, Ph<sub>3</sub>P (1.2 g, 4.6 mmol, 2.3 equiv) in THF (5 mL) was added drop-wise to the reaction at 0 °C. The reaction mixture was warmed up to 50 °C and stirred for 8 h (monitored by IR until the absorption of azido groups disappeared). The reaction mixture was cooled to room temperature, then Boc<sub>2</sub>O (1.09 g, 5.0 mmol, 2.5 equiv) in THF (5 mL) was added, the reaction mixture was stirred for 2 h at 22 °C. The mixture was concentrated *in vacuo* and re-dissolved in EtOAc (20 mL) and H<sub>2</sub>O (10 mL), The organic phase was separated from the aqueous phase and the aqueous phase was further extracted with EtOAc (10 mL×3). The combined organic phase was dried over Na<sub>2</sub>SO<sub>4</sub>. After concentration *in vacuo*, the residue was purified through column chromatography (hexanes/EtOAc: from 50:1 to 2:1) to afford the desired product **55** as a white solid (681 mg, 85% yield, m.p. 118–120 °C).

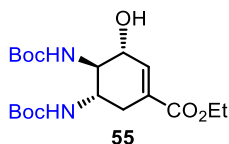

**Ethyl (3R,4R,5S)-4,5-bis((tert-butoxycarbonyl)amino)-3-hydroxycyclohex-1-ene-1-carboxylate (55):**  $[\alpha]_D^{20} = -12.2^\circ$  (*c* 1.35, CHCl<sub>3</sub>). IR  $\nu_{\max}$  (neat)/cm<sup>-1</sup>: 3346 (m), 1714 (m), 1680 (s), 1528 (s), 1364 (m), 1314 (m), 1243 (s), 1166 (s), 1073 (m), 1016 (m), 967 (m), 780 (m); <sup>1</sup>H NMR (400 MHz, CDCl<sub>3</sub>)  $\delta$  6.79 (t, *J* = 2.2 Hz, 1H), 5.72 (d, *J* = 6.8 Hz, 1H), 4.87 (d, *J* = 8.8 Hz, 1H), 4.32–4.25 (m, 1H), 4.24–4.12 (m, 3H), 3.84–3.71 (m, 1H), 3.53–3.42 (m, 1H), 2.82 (dd, *J* = 17.5, 5.1 Hz, 1H), 2.17 (ddt, *J* = 17.3, 10.9, 3.1 Hz, 1H), 1.44 (s, 9H), 1.43 (s, 9H), 1.28 (t, *J* = 7.1 Hz, 3H); <sup>13</sup>C NMR (100 MHz, CDCl<sub>3</sub>)  $\delta$  165.9, 158.4, 156.9, 138.8, 128.2, 80.3 (two carbons overlapped each other), 73.3, 61.0, 59.9, 48.4, 31.3, 28.3 (two carbons overlapped each other), 14.1; LRMS (ESI, *m/z*): calcd for C<sub>19</sub>H<sub>32</sub>N<sub>2</sub>O<sub>7</sub>Na<sup>+</sup>, [M + Na<sup>+</sup>], 423.2, found 423.2.

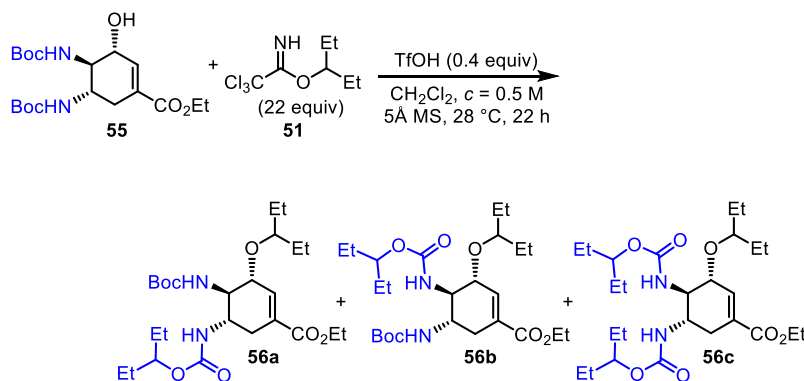

To a flame-dried sealable 3-dram vial equipped with a stir bar were added **55** (401 mg, 1.0 mmol, 1.0 equiv) and 5 Å molecular sieves powder (400 mg). After the vial was evacuated and backfilled with N<sub>2</sub> twice, anhydrous CH<sub>2</sub>Cl<sub>2</sub> (2.0 mL) and freshly distilled pentan-3-yl 2,2,2-trichloroacetimidate (3.84 mL, 22 mmol, 22 equiv) were added. The reaction was cooled to 0 °C and TfOH (36 μL, 0.4 mmol, 0.4 equiv) was added. After the addition of TfOH, the reaction mixture was warmed up to 28 °C and stirred at this temperature for 22 h until **55** was fully consumed (monitored by TLC). The mixture was cooled to 0 °C, and Et<sub>3</sub>N (0.14 mL, 1.0 mmol, 1.0 equiv) in CH<sub>2</sub>Cl<sub>2</sub> (3 mL) was added to quench the reaction. The mixture was filtered and the solid was washed with CH<sub>2</sub>Cl<sub>2</sub> (5 mL×4). The filtrate was concentrated *in vacuo* and the residue was purified through column chromatography (hexanes/EtOAc: from 100:1 to 10:1) to afford inseparable mixture of **56a** and **56b** and **56c** as viscous oil.

Note: in order to confirm the structures of **56a**, **56b** and **56c**, They were further treated with TFA to afford **S4** and **S5**.

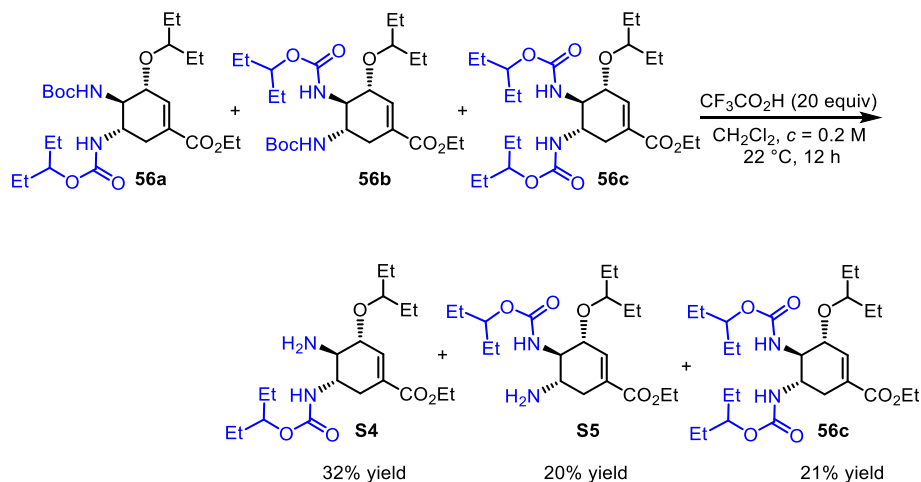

To a flame-dried sealable 3-dram vial equipped with a stir bar were added the inseparable products obtained in last step. After the vial was evacuated and backfilled with N<sub>2</sub> twice, anhydrous CH<sub>2</sub>Cl<sub>2</sub> (5.0 mL) was added. The reaction was cooled to 0 °C and TFA (1.53 mL, 20 mmol, 20 equiv) was added, then the reaction mixture was warmed up to 22 °C and stirred at this temperature for 12 h. The mixture was concentrated *in vacuo* and the residue was re-dissolved in CH<sub>2</sub>Cl<sub>2</sub> (10 mL), washed with saturated NaHCO<sub>3</sub> solution (3 mL), the organic phase was dried over Na<sub>2</sub>SO<sub>4</sub>. After concentration *in vacuo*, the residue was purified through column chromatography (CH<sub>2</sub>Cl<sub>2</sub>/MeOH: from 100:1 to 10:1) to afford the product **S4** as a white solid (123 mg, 32% yield, m.p. 75–77 °C), product **S5** as viscous oil (77 mg, 20% yield) and recover product **S6c** as a white solid (105 mg, 21% yield, m.p. 118–120 °C).

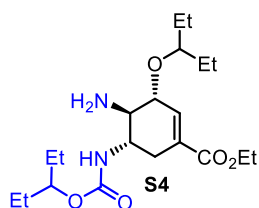

**Ethyl (3R,4R,5S)-4-amino-3-(pentan-3-yloxy)-5-(((pentan-3-yloxy)carbonyl)amino)cyclohex-1-ene-1-carboxylate (S4):** IR  $\nu_{\text{max}}$  (neat)/cm<sup>-1</sup>: 2967 (m), 2941 (w), 2878 (w), 1714 (s), 1693 (s), 1556 (s), 1463 (m), 1262 (s), 1237 (s), 1226 (s), 1155 (m), 1099 (s), 1043 (s), 1013 (s), 940 (s), 756 (m), 734 (m); <sup>1</sup>H NMR (400 MHz, CDCl<sub>3</sub>)  $\delta$  6.81 (s, 1H), 5.19 (d, *J* = 6.0 Hz, 1H), 4.69–4.54 (m, 1H), 4.19 (q, *J* = 7.1 Hz, 2H), 3.88–3.80 (m, 1H), 3.79–3.58 (m, 1H), 3.40 (quint, *J* = 5.7 Hz, 1H), 2.89 (dd, *J* = 9.4, 6.9 Hz, 1H), 2.81 (dd, *J* = 17.9, 5.4 Hz, 1H), 2.25 (ddt, *J* = 18.0, 8.5, 2.6 Hz, 1H), 1.66–1.45 (m, 10H), 1.28 (t, *J* = 7.1 Hz, 3H), 0.94–0.86 (m, 12H); <sup>13</sup>C NMR (100 MHz, CDCl<sub>3</sub>)  $\delta$  166.3, 156.7, 136.5, 129.3, 81.3, 78.3, 77.2, 60.8, 54.9, 50.4, 30.5, 26.6 (two carbons overlapped each other), 26.3, 25.7, 14.2, 9.6 (two carbons overlapped each other), 9.5 (two carbons overlapped each other); LRMS (ESI, *m/z*): calcd for C<sub>20</sub>H<sub>36</sub>N<sub>2</sub>O<sub>5</sub>Na<sup>+</sup>, [M + Na<sup>+</sup>], 407.3, found 407.3.

Note: The structure of **S4** was further confirmed by <sup>1</sup>H–<sup>1</sup>H COSY NMR analysis: there are strong correlations observed between H<sub>d</sub> and H<sub>e1</sub>/H<sub>e2</sub> as well as H<sub>d</sub> and H<sub>c</sub>.

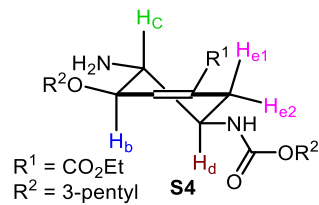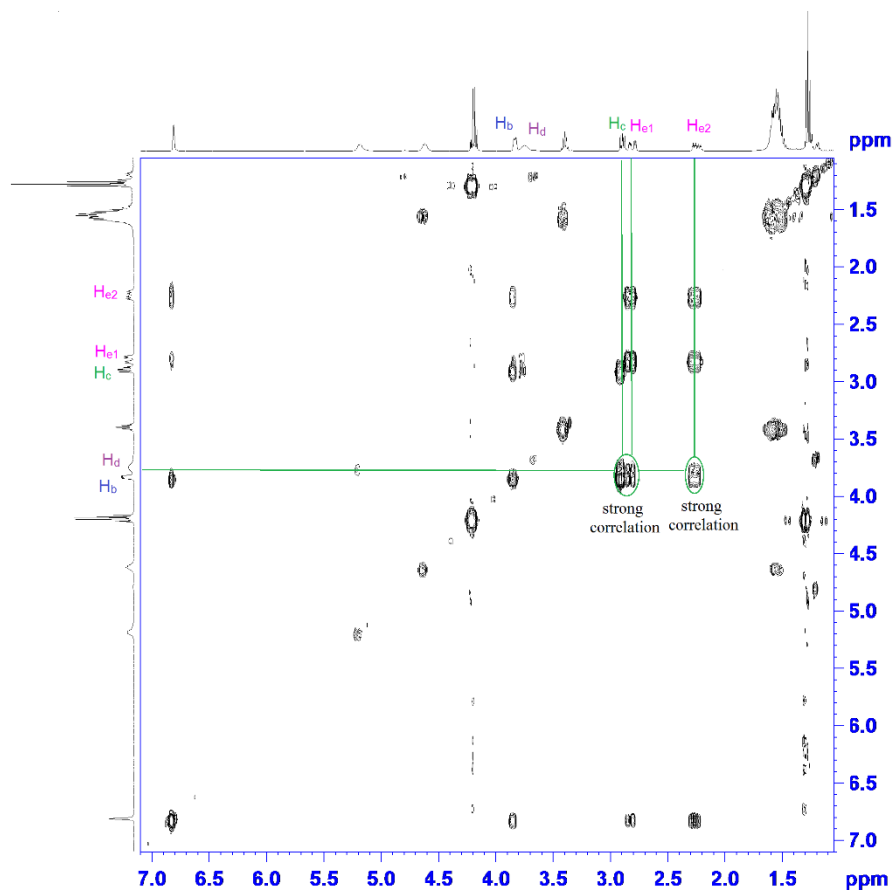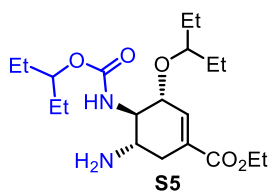

**Ethyl (3*R*,4*R*,5*S*)-5-amino-3-(pentan-3-yloxy)-4-(((pentan-3-yloxy)carbonyl)amino) cyclohex-1-ene-1-carboxylate (S5):** IR  $\nu_{\text{max}}$  (neat)/ $\text{cm}^{-1}$ : 2965 (m), 2936 (w), 2878 (w), 1712 (s), 1690 (s), 1533 (s), 1463 (m), 1290 (m), 1231 (s), 1118 (s), 1052 (s), 925 (m), 773 (m), 733 (m);

$^1\text{H}$  NMR (400 MHz, pyridine- $d_5$ )  $\delta$  7.99 (d,  $J = 8.9$  Hz, 1H), 7.01 (t,  $J = 2.0$  Hz, 1H), 4.91–4.80 (m, 1H), 4.38–4.37 (m, 1H), 4.15 (q,  $J = 7.1$  Hz, 2H), 3.88 (dd,  $J = 19.3, 9.0$  Hz, 1H), 3.44 (dt,  $J = 11.0, 5.5$  Hz, 1H), 3.38–3.25 (m, 1H), 3.02 (dd,  $J = 17.7, 4.8$  Hz, 1H), 2.38–2.22 (m, 1H), 1.64–1.39 (m, 8H), 1.12 (t,  $J = 7.1$  Hz, 3H), 0.99–0.74 (m, 12H);  $^{13}\text{C}$  NMR (100 MHz, pyridine- $d_5$ )  $\delta$  166.3, 157.7, 138.8, 129.7, 81.6, 76.1 (two carbons overlapped each other), 60.5, 60.3, 50.7, 34.2, 26.9, 26.8, 26.2, 25.9, 14.1, 9.6 (two carbons overlapped each other), 9.5, 9.4; LRMS (ESI,  $m/z$ ): calcd for  $\text{C}_{20}\text{H}_{36}\text{N}_2\text{O}_5\text{Na}^+$ ,  $[\text{M} + \text{Na}^+]$ , 407.3, found 407.3.

Note: The structure of **S5** was further confirmed by  $^1\text{H}$ - $^1\text{H}$  COSY NMR analysis: there are strong correlations observed between  $\text{H}_d$  and  $\text{H}_{e1}/\text{H}_{e2}$ ,  $\text{H}_d$  and  $\text{H}_c$ , as well as  $\text{H}_b$  and  $\text{H}_c$ .

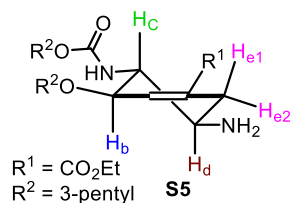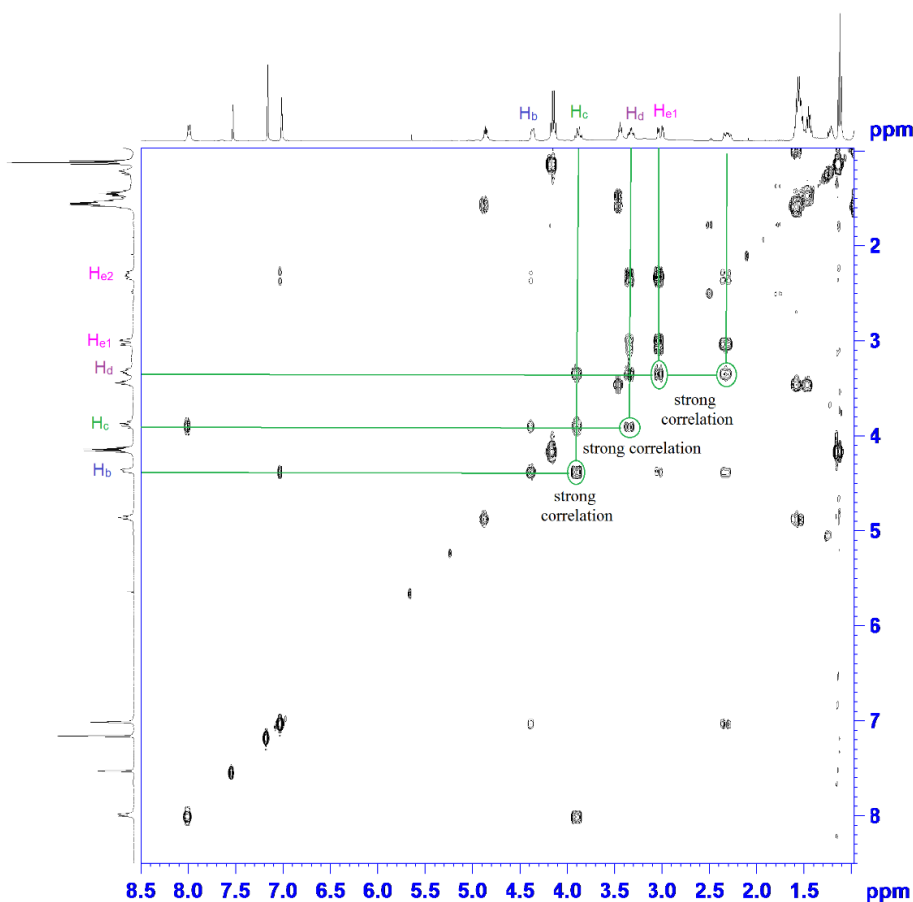

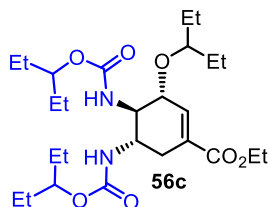

**Ethyl (3R,4R,5S)-3-(pentan-3-yloxy)-4,5-bis(((pentan-3-yloxy)carbonyl)amino)cyclohex-1-ene-1-carboxylate (56c):** IR  $\nu_{\text{max}}$  (neat)/ $\text{cm}^{-1}$ : 3297 (m), 2967 (m), 2940 (w), 2879 (w), 1728 (m), 1674 (s), 1537 (s), 1462 (m), 1282 (s), 1242 (s), 1229 (s), 1057 (s), 992 (m), 926 (m), 775 (m), 732 (m);  $^1\text{H}$  NMR (400 MHz,  $\text{CDCl}_3$ )  $\delta$  6.79 (s, 1H), 5.46 (d,  $J = 8.1$  Hz, 1H), 4.75 (d,  $J = 8.4$  Hz, 1H), 4.61–4.55 (m, 2H), 4.20 (q,  $J = 7.1$  Hz, 2H), 3.99–3.95 (m, 1H), 3.89 (dd,  $J = 16.0, 7.3$  Hz, 1H), 3.81–3.78 (m, 1H), 3.40 (quint,  $J = 5.4$  Hz, 1H), 2.84–2.65 (m, 1H), 2.32 (dd,  $J = 17.6, 8.0$  Hz, 1H), 1.65–1.42 (m, 12H), 1.28 (t,  $J = 7.1$  Hz, 3H), 0.97–0.73 (m, 18H);  $^{13}\text{C}$  NMR (100 MHz,  $\text{CDCl}_3$ )  $\delta$  166.1, 157.3, 156.7, 136.9, 129.5, 82.2, 77.6, 77.2, 75.6, 60.9, 54.8, 49.6, 30.9, 26.6, 26.5 (two carbons overlapped each other), 26.4, 26.1, 25.8, 14.2, 9.5 (three carbons overlapped), 9.4, 9.3 (two carbons overlapped each other); LRMS (ESI, m/z): calcd for  $\text{C}_{26}\text{H}_{46}\text{N}_2\text{O}_7\text{Na}^+$ ,  $[\text{M} + \text{Na}^+]$ , 521.3, found 521.3.

## I. References

- (1) Trost, B. M.; Chupak, L. S.; Lübbers, T. "Short Preparation of (*S*)-(*E*)-1-(*O*-Methylmandeloxo)butadiene." *J. Org. Chem.* **1997**, *62*, 736.
- (2) Pritchard, R. G.; Stoodley, R. J.; Yuen, W.-H. "Studies Related to Carba-pyranoses: Synthesis of Acetylated Derivatives of 4-Amino-2,4-Dideoxy-3-*O*-( $\beta$ -*D*-glucopyranosyl)- $\beta$ -*L*-(and  $\beta$ -*D*-)altrocarba-pyranose from a *D*-Glucose Template." *Org. Biomol. Chem.* **2005**, *3*, 162.
- (3) Banks, R. E.; Miller, J. A.; Nunn, M. J.; Stanley, P.; Weakley, T. J. R.; Ullah, Z. "Diels-Alder Route to Potential Trichothecene Precursors." *J. Chem. Chem., Perkin Trans. 1.* **1981**, 1096.
- (4) Shie, J.-J.; Fang, J.-M.; Wang, S.-Y.; Tsai, K.-C.; Cheng, Y.-S. E.; Yang, A.-S.; Hsiao, S.-C.; Su, C.-Y.; Wong, C.-H. "Synthesis of Tamiflu and its Phosphonate Congeners Possessing Potent Anti-Influenza Activity." *J. Am. Chem. Soc.* **2007**, *129*, 11892.
- (5) Lu, D.-F.; Zhu, C.-L.; Jia, Z.-X.; Xu, H. "Iron(II)-Catalyzed Intermolecular Amino-Oxygenation of Olefins through the N–O Bond Cleavage of Functionalized Hydroxylamines." *J. Am. Chem. Soc.* **2014**, *136*, 13186.
- (6) Magano, J.; Chen, M. H.; Clark, J. D.; Nussbaumer, T. "2-(Diethylamino)ethanethiol, a New Reagent for the Odorless Deprotection of Aromatic Methyl Ethers." *J. Org. Chem.* **2006**, *71*, 7103.
- (7) Zhu, H.-T.; Arosio, L.; Villa, R.; Nebuloni, M.; Xu, H. "Process Safety Assessment of the Iron-Catalyzed Direct Olefin Diazidation for the Expedient Synthesis of Vicinal Primary Diamines." *Org. Process Res. Dev.* **2017**, *21*, 2068.
- (8) Shen, S.-J.; Zhu, C.-L.; Lu, D.-F.; Xu, H. "Iron-Catalyzed Direct Olefin Diazidation via Peroxyester Activation Promoted by Nitrogen-Based Ligands." *ACS Catal.* **2018**, *8*, 4473.
- (9) Zutter, U.; Iding, H.; Spurr, P.; Wirz, B. "New, Efficient Synthesis of Oseltamivir Phosphate (Tamiflu) via Enzymatic Desymmetrization of a meso-1,3-Cyclohexanedicarboxylic Acid Diester." *J. Org. Chem.* **2008**, *73*, 4895.



# J. NMR Spectra

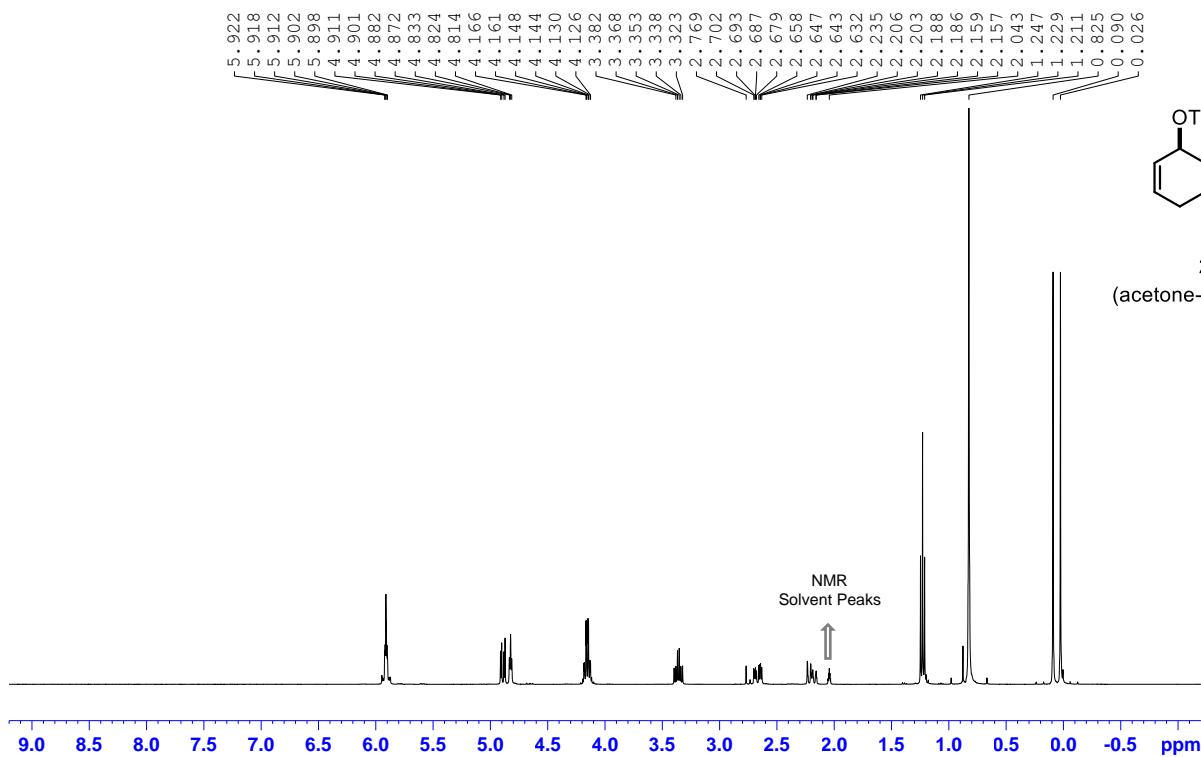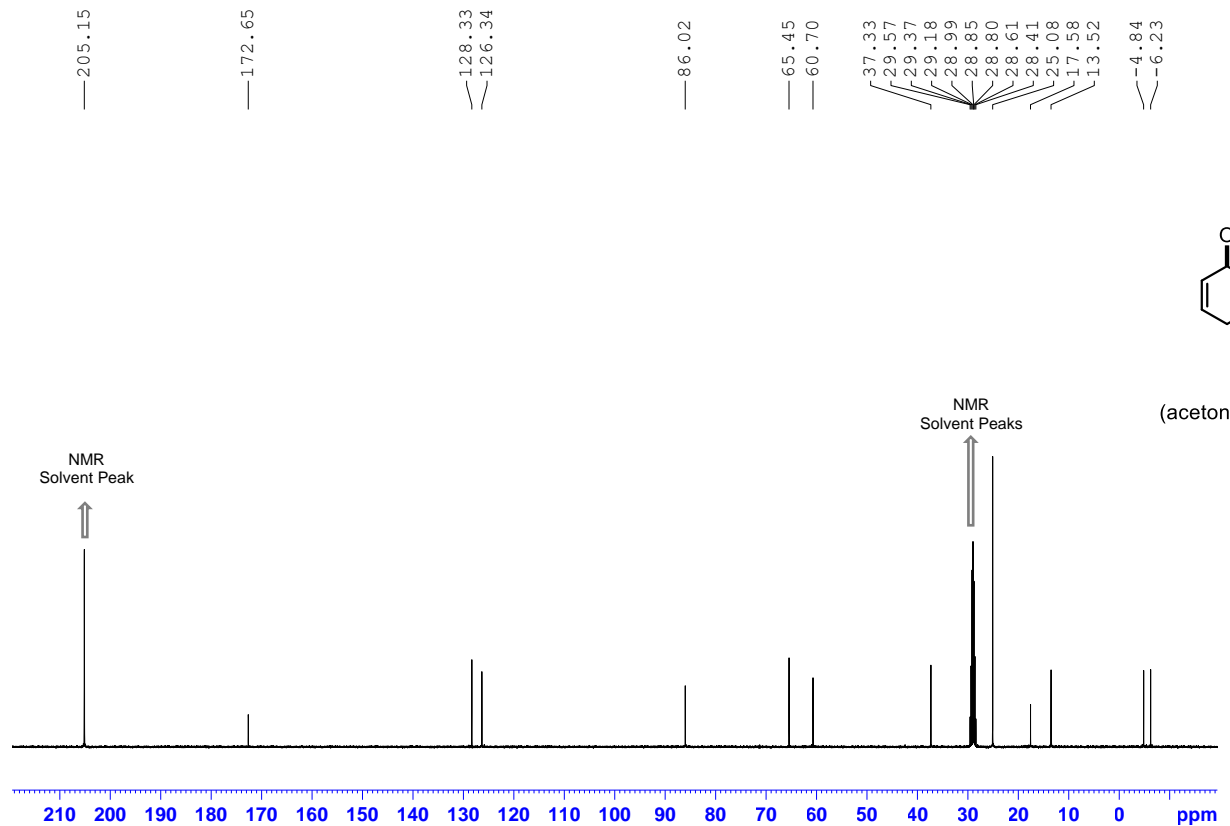

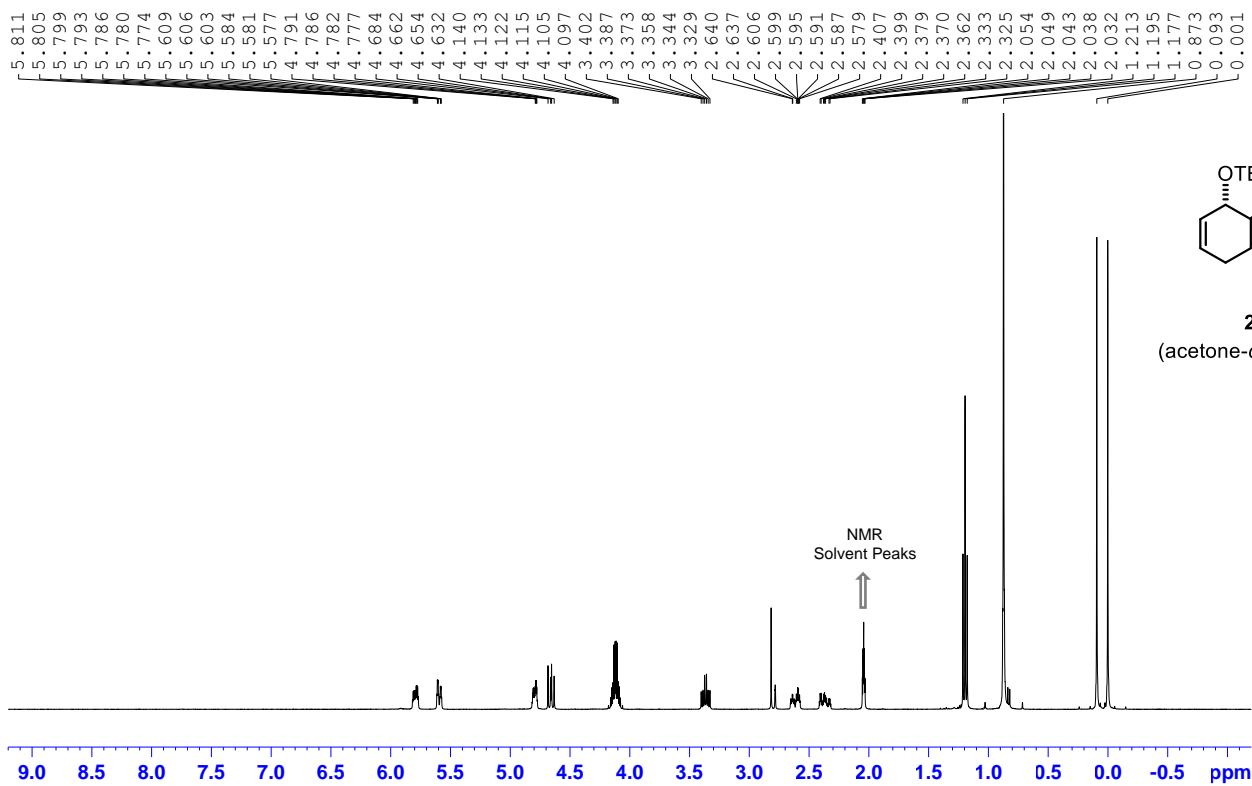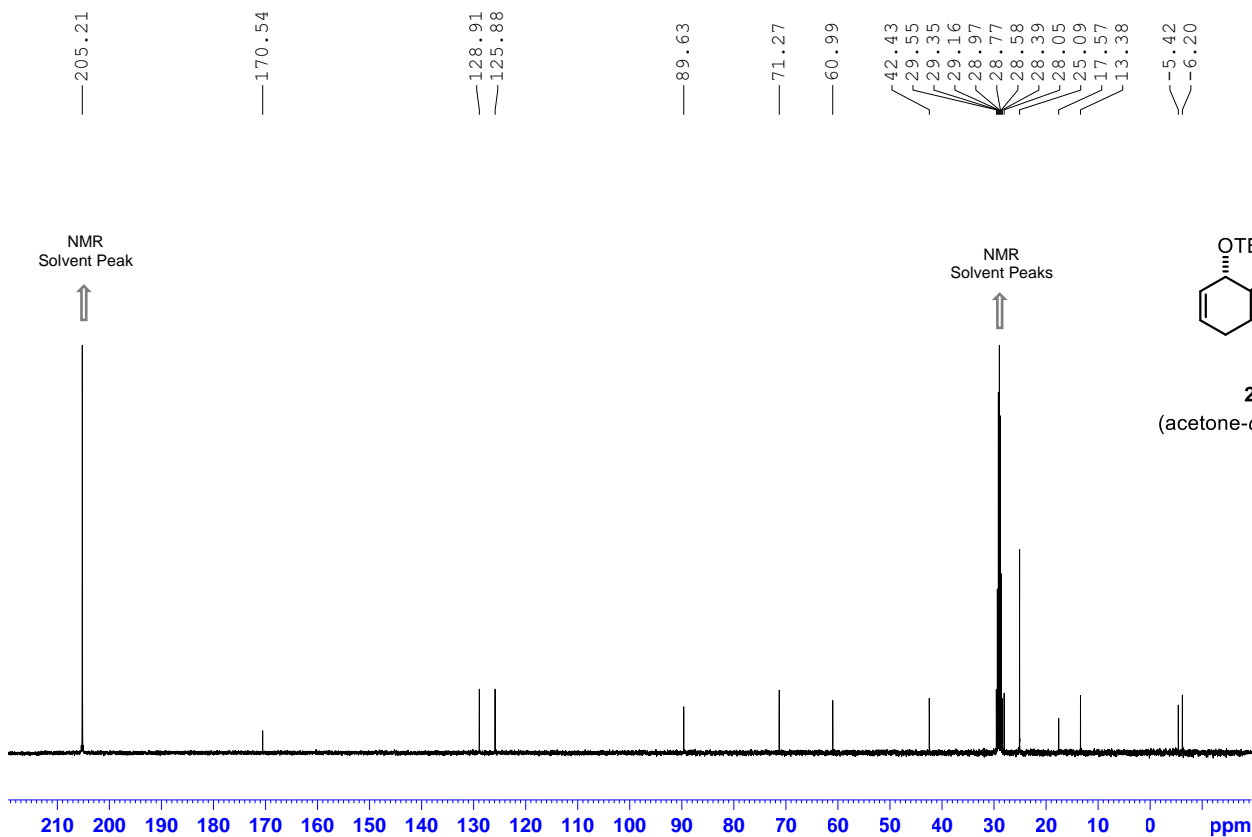

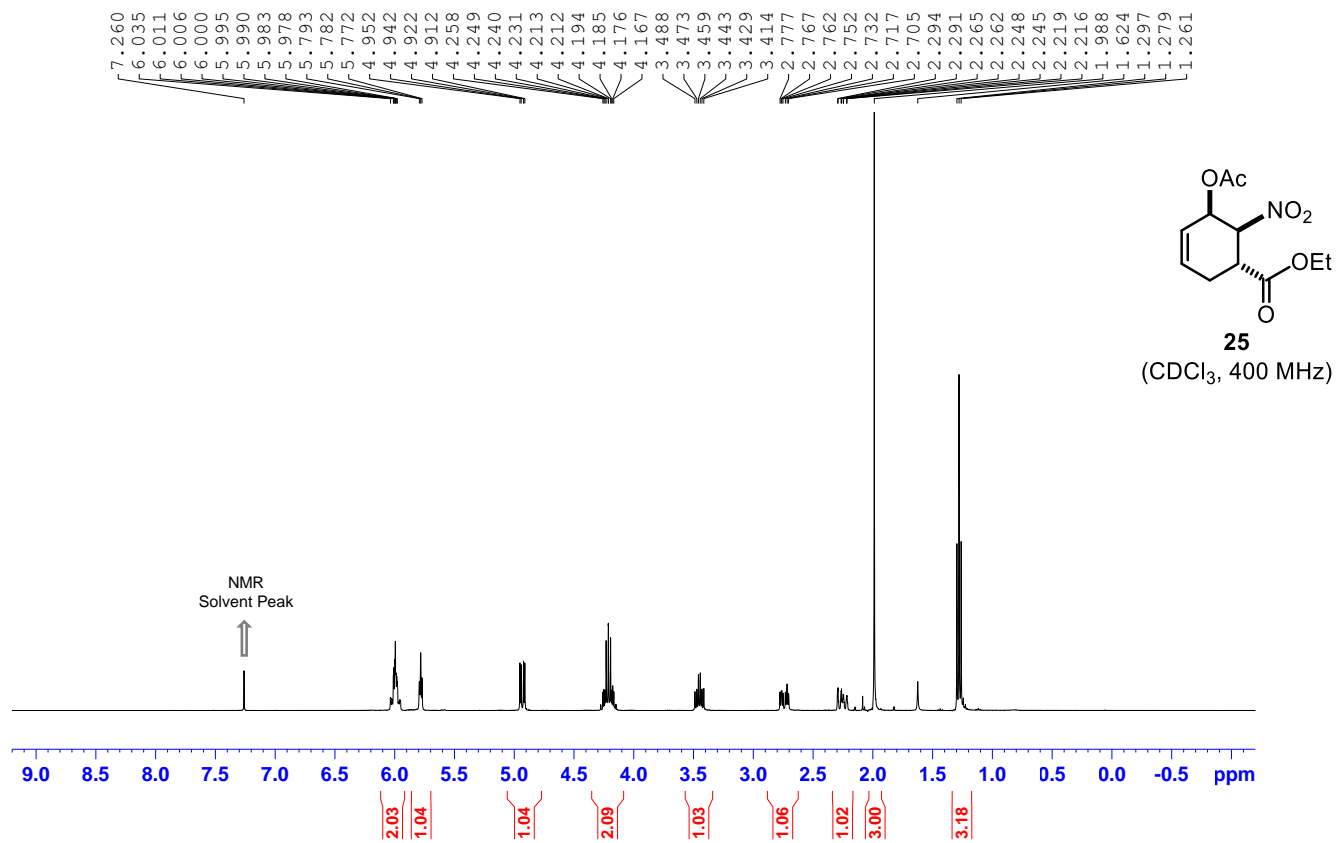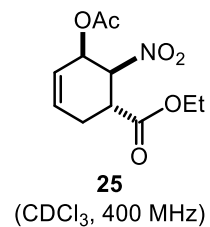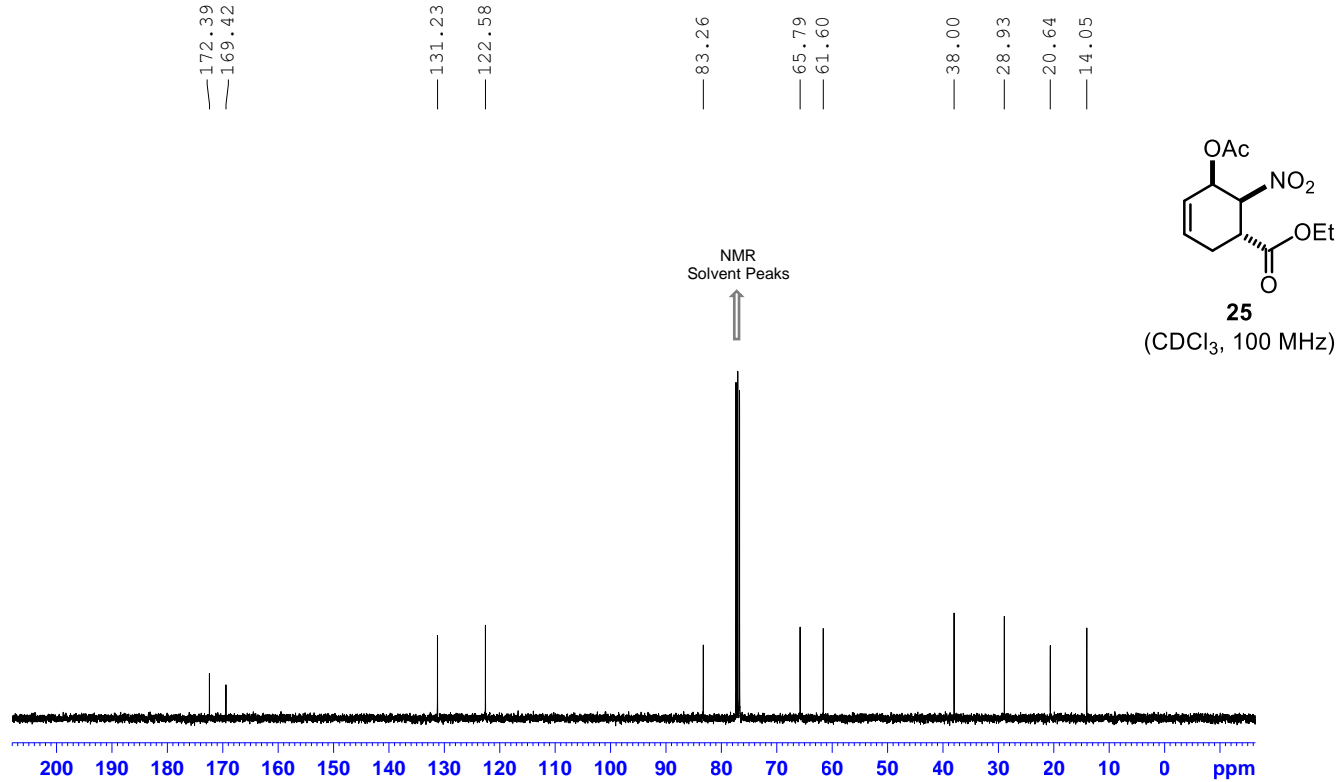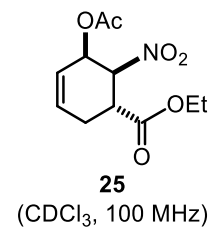

7.260  
5.961  
5.936  
5.933  
5.927  
5.920  
5.916  
4.846  
4.836  
4.816  
4.806  
4.788  
4.233  
4.224  
4.215  
4.210  
4.206  
4.197  
4.192  
4.188  
4.184  
4.175  
4.170  
4.165  
4.157  
4.148  
3.417  
3.402  
3.389  
3.374  
3.359  
3.344  
2.714  
2.705  
2.699  
2.693  
2.690  
2.669  
2.659  
2.654  
2.644  
2.450  
2.440  
2.247  
2.240  
2.218  
2.212  
2.202  
2.198  
2.173  
1.281  
1.264  
1.246

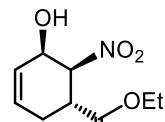

(-)-**26**  
(CDCl<sub>3</sub>, 400 MHz)

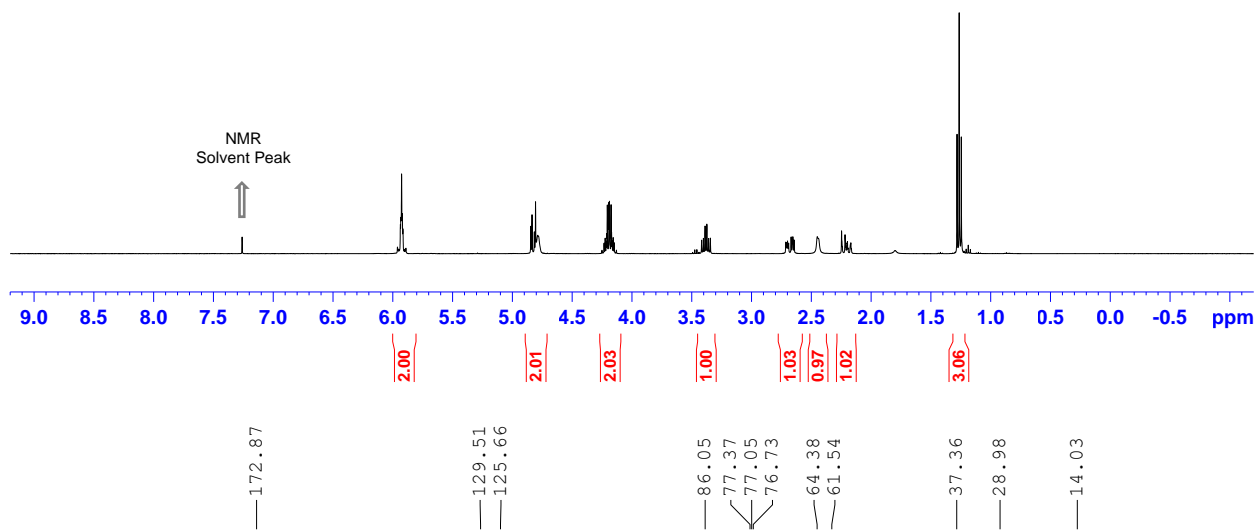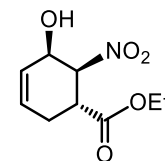

(-)-**26**  
(CDCl<sub>3</sub>, 100 MHz)

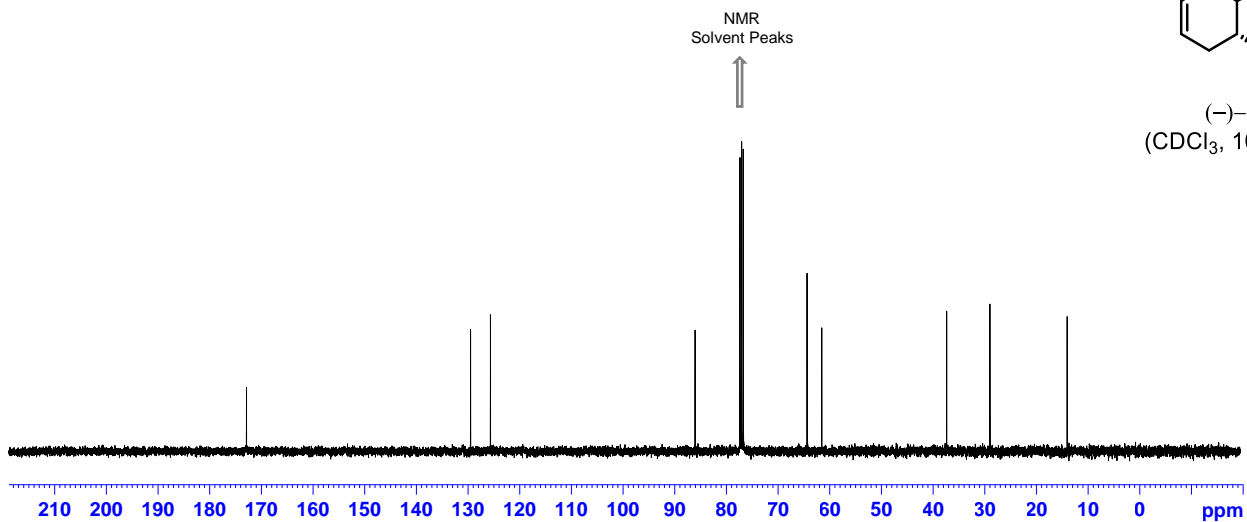

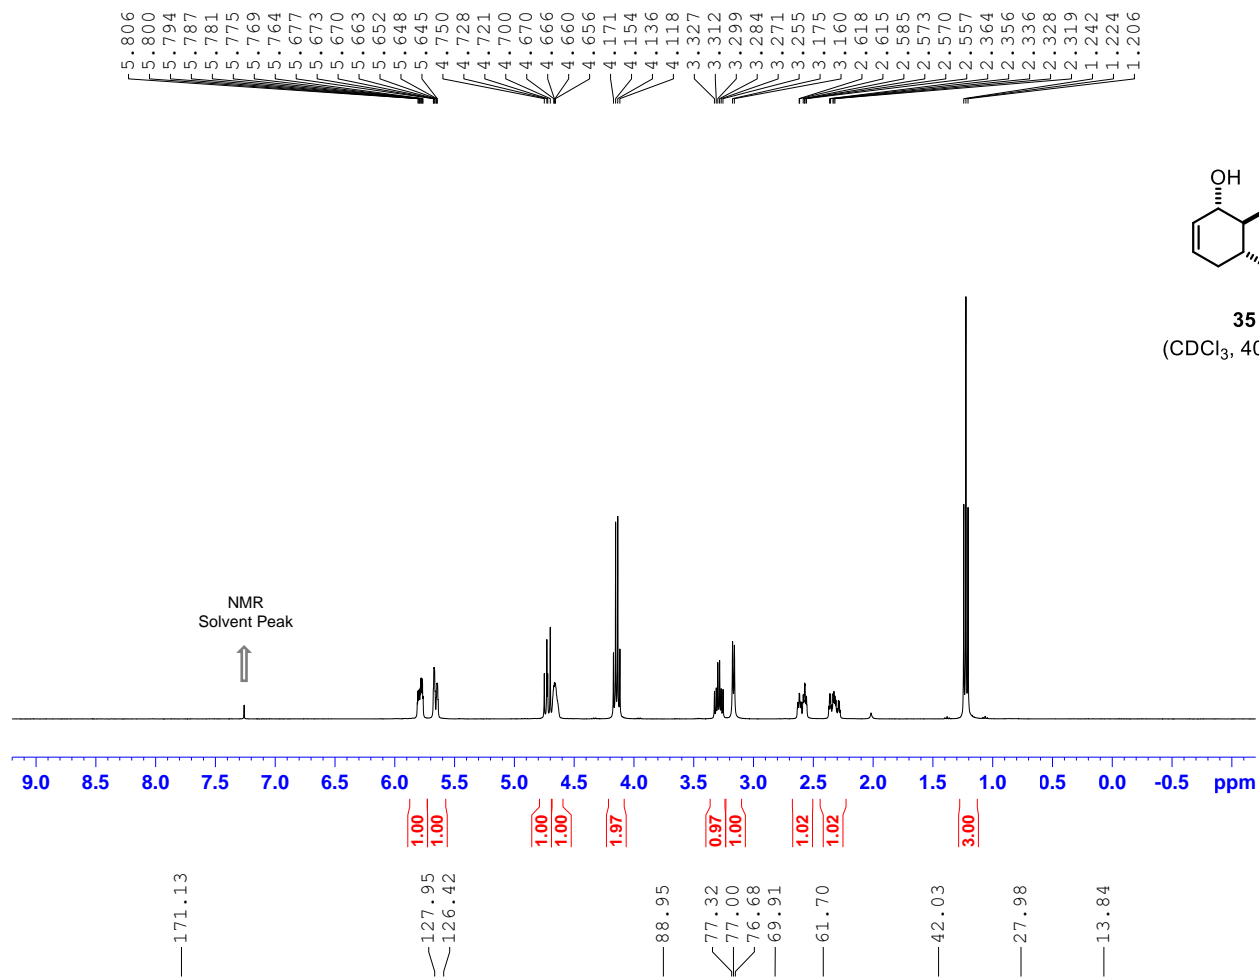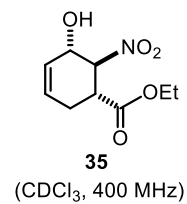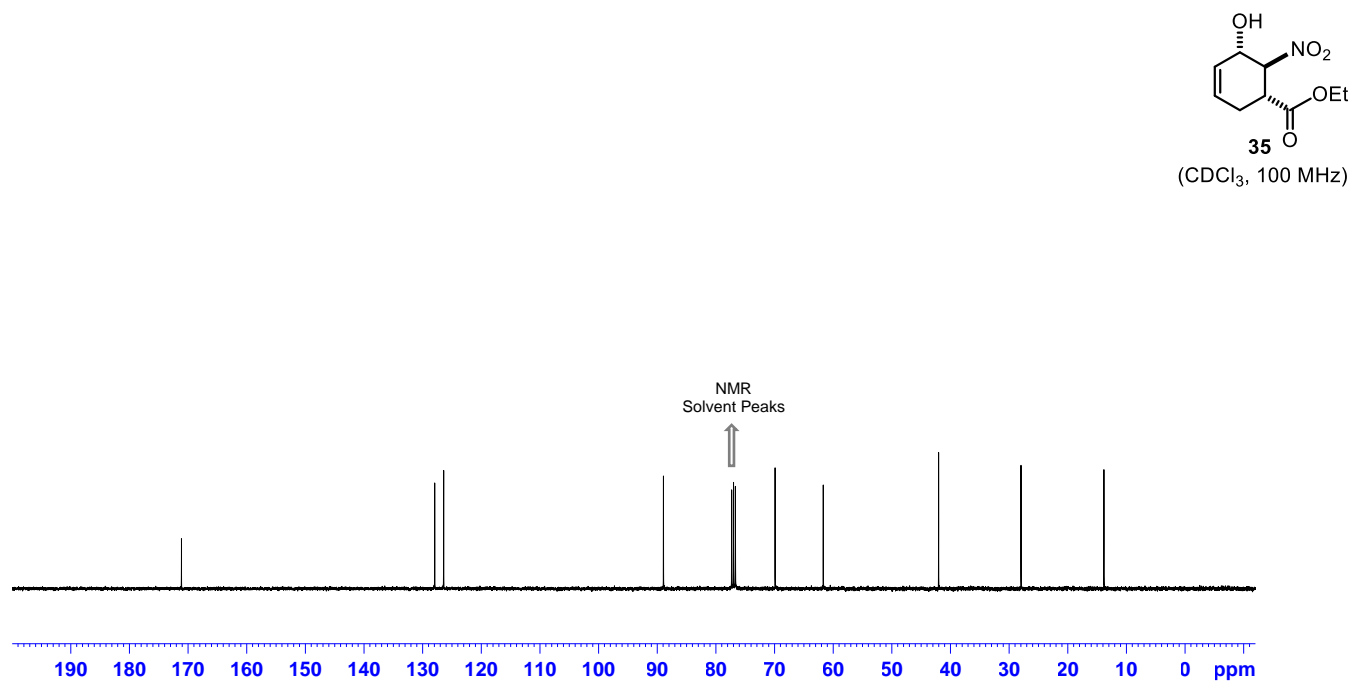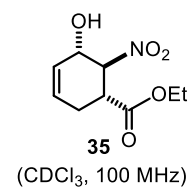

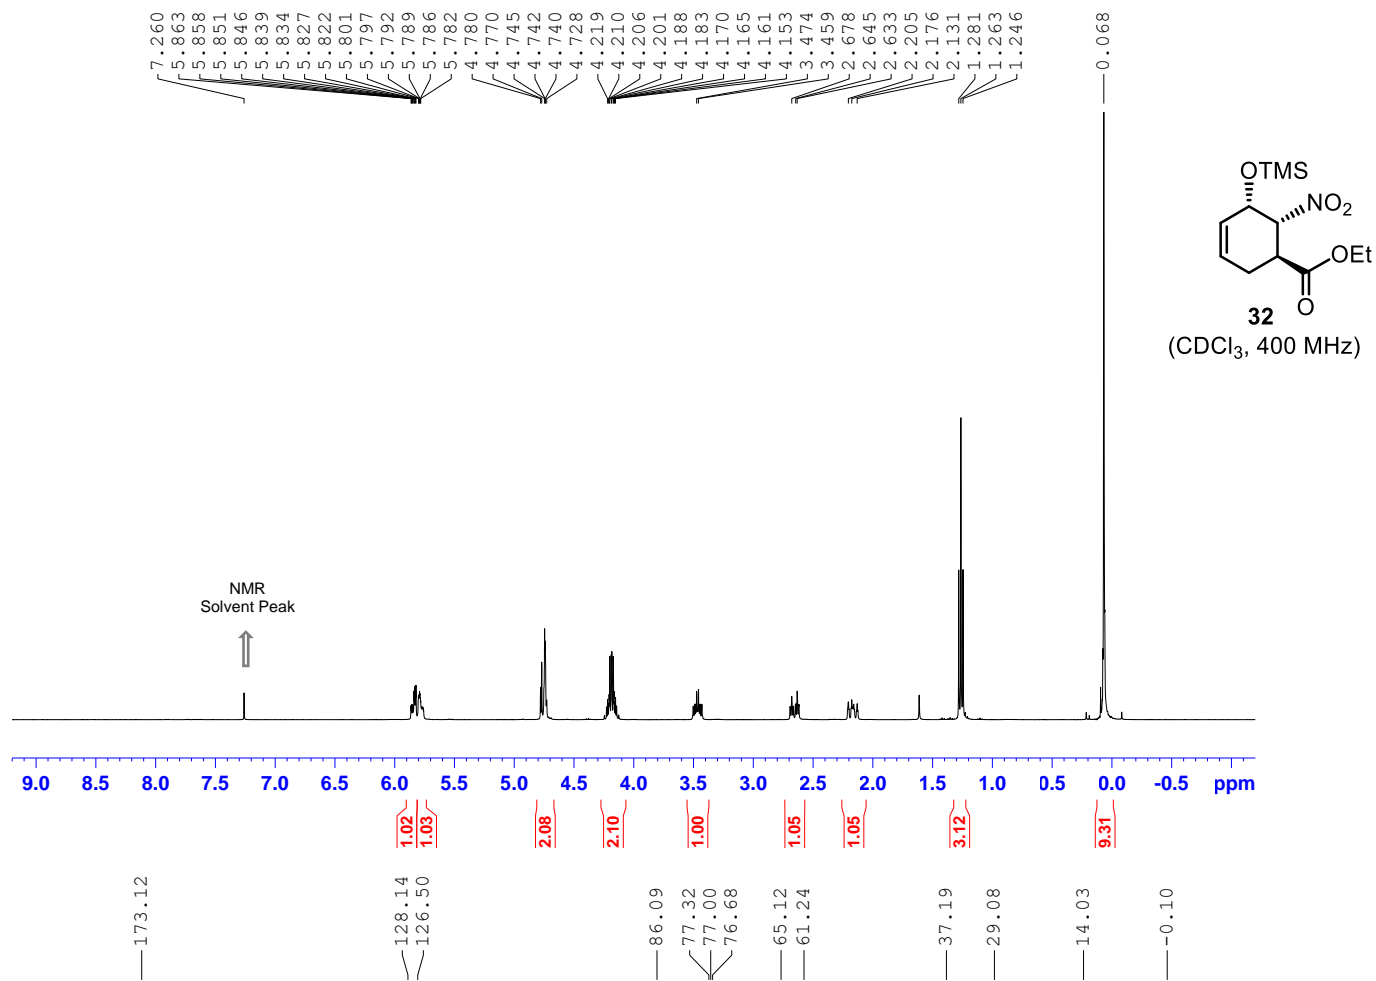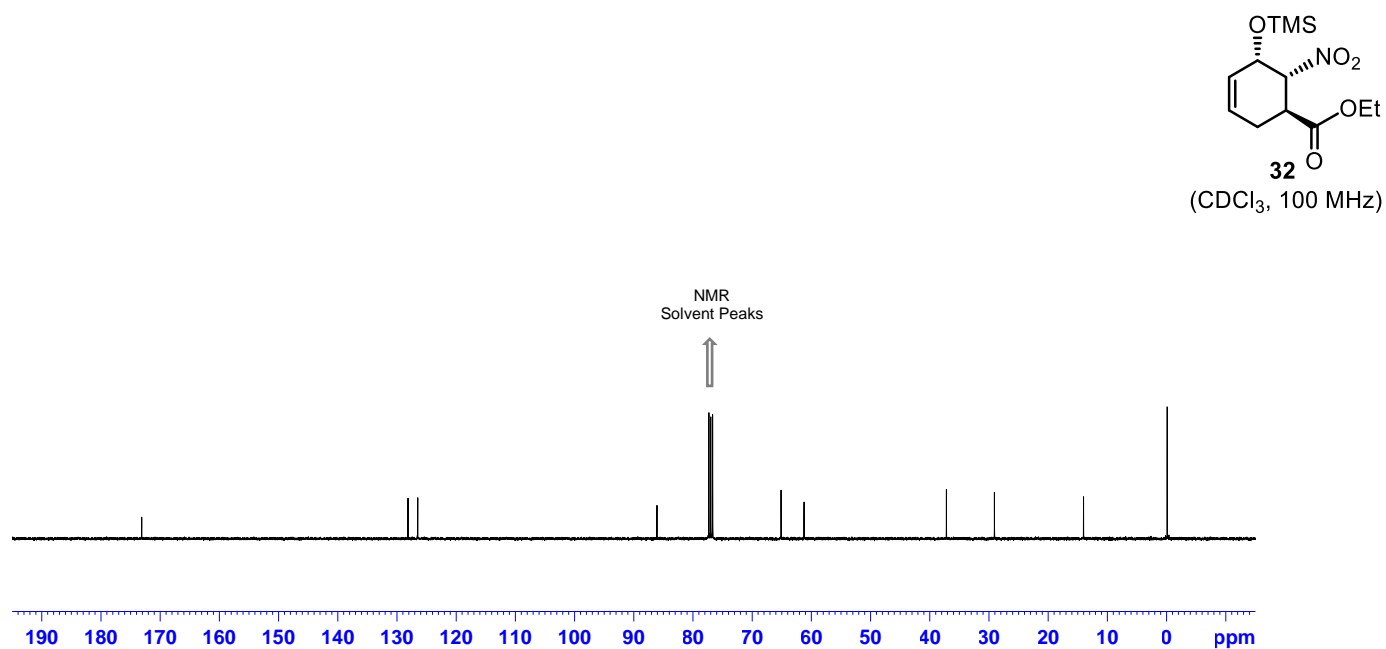

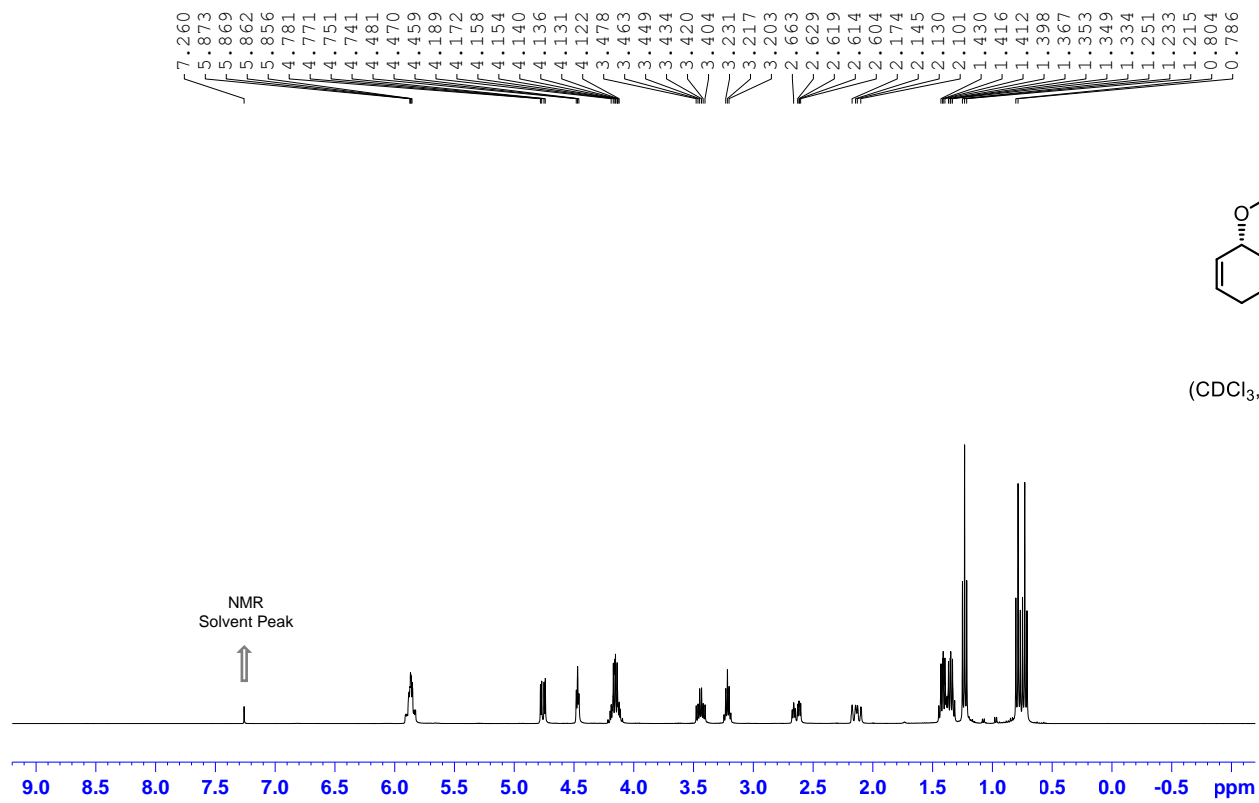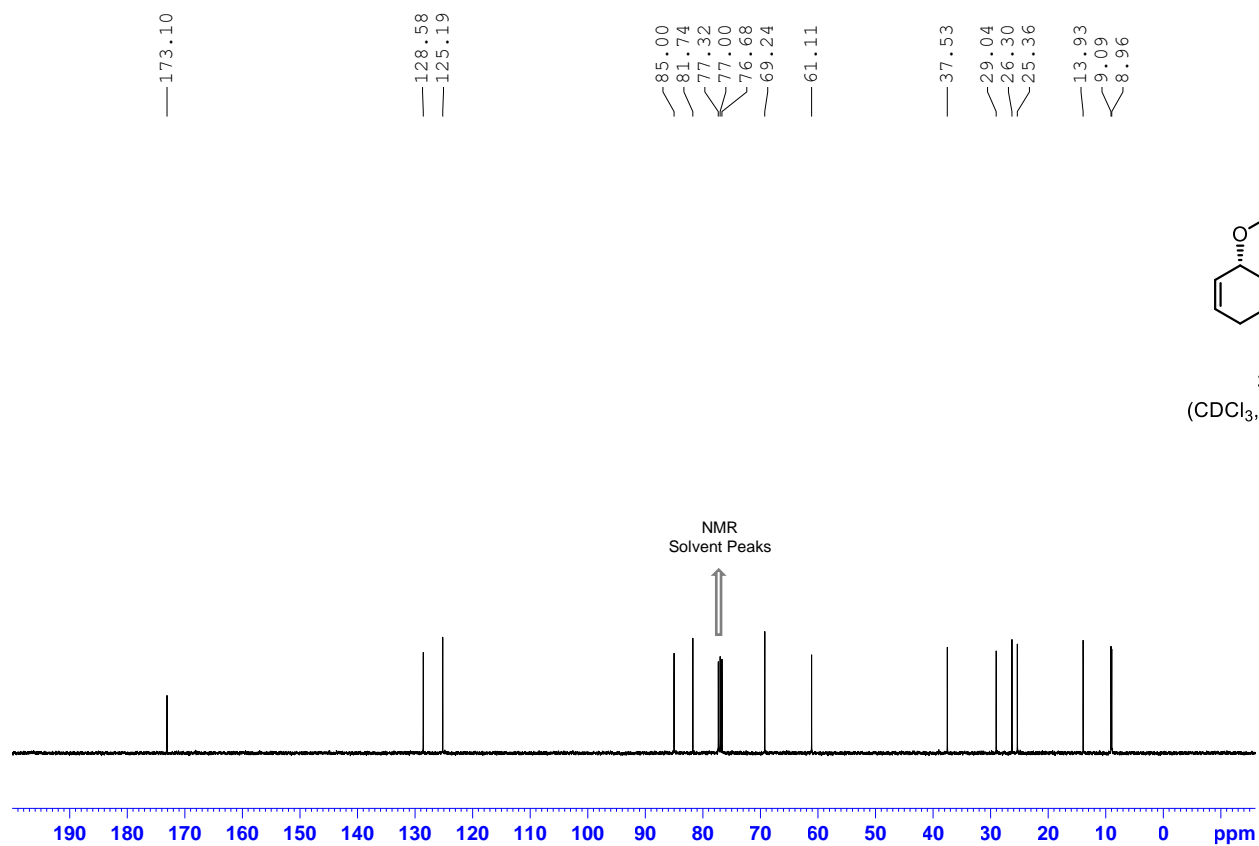

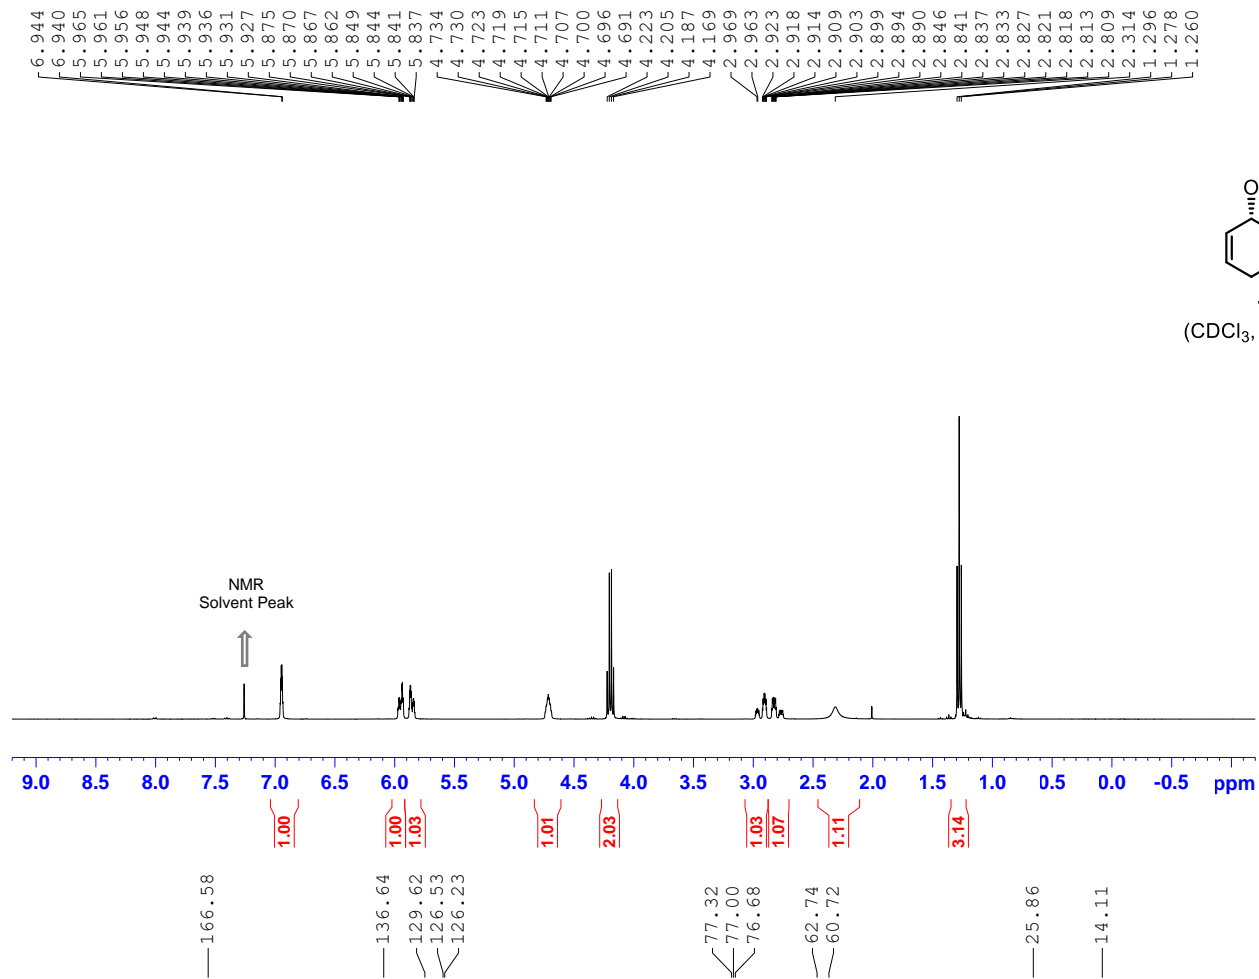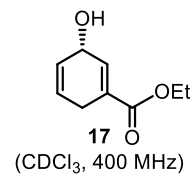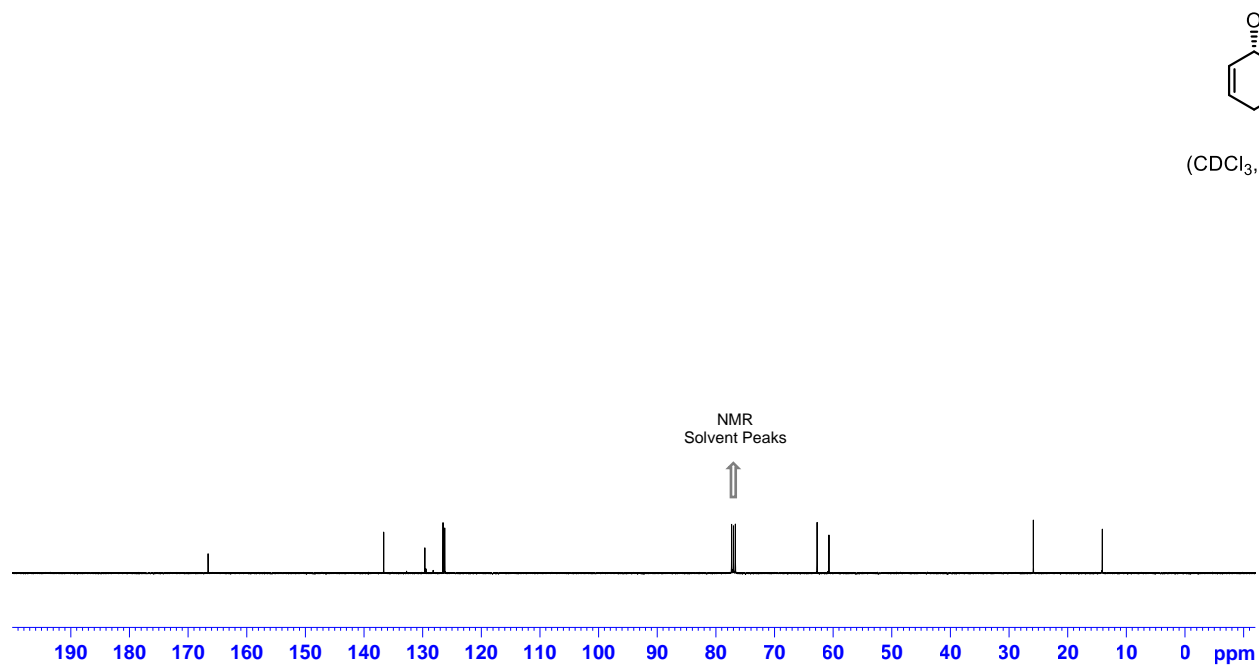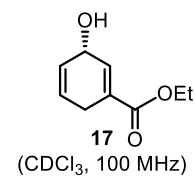



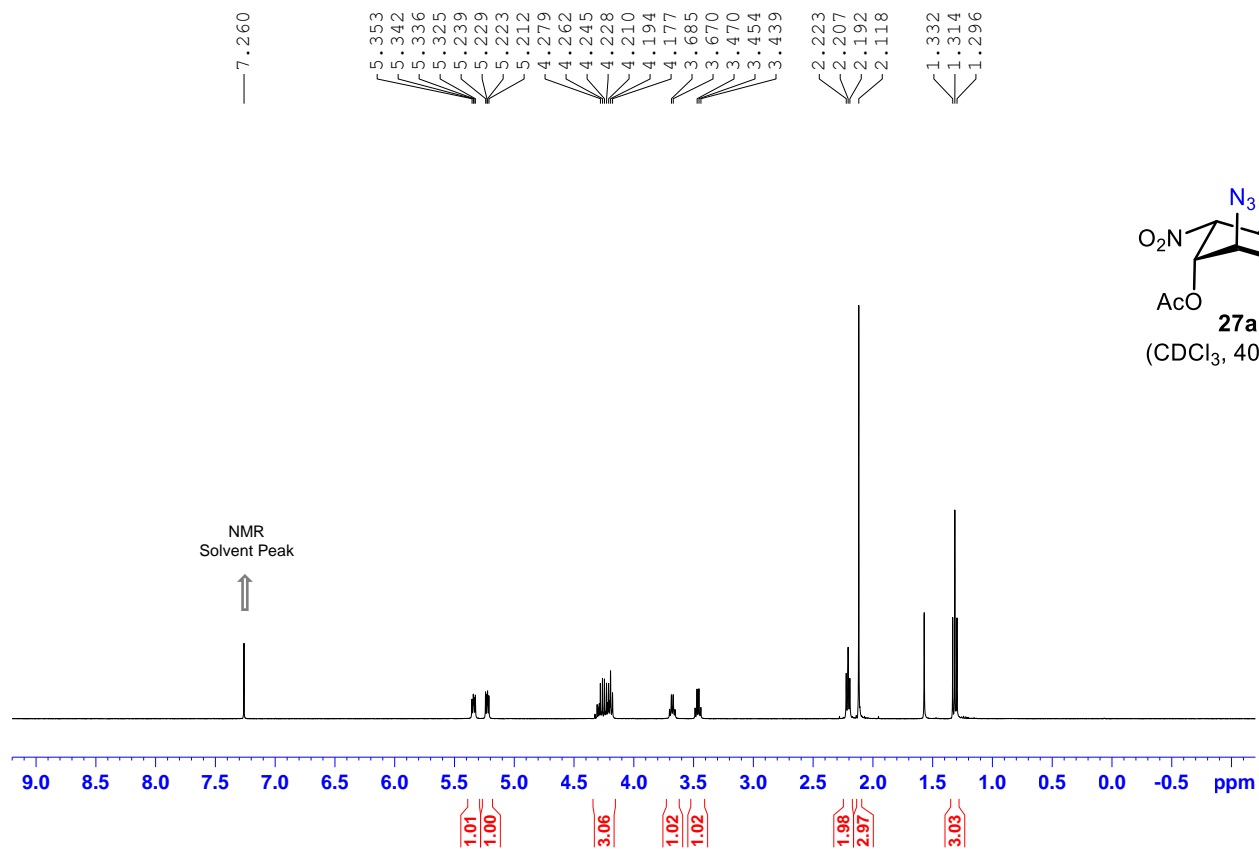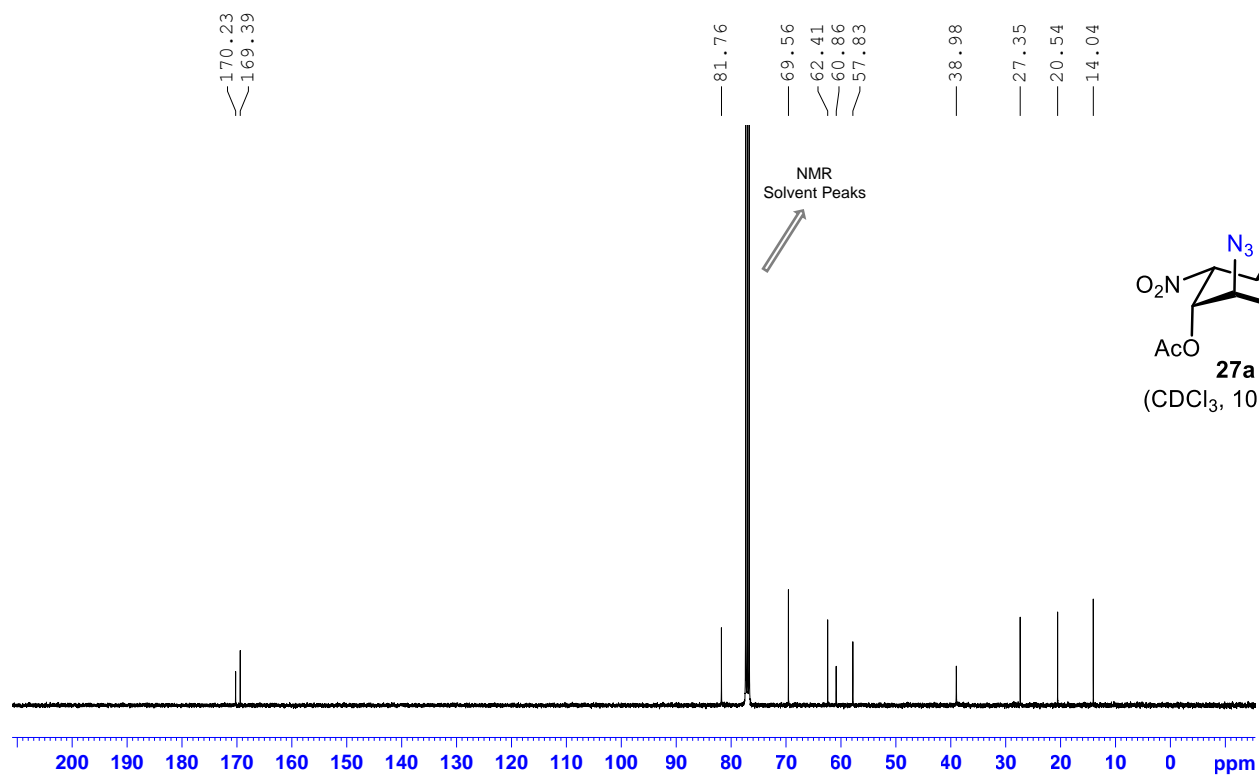

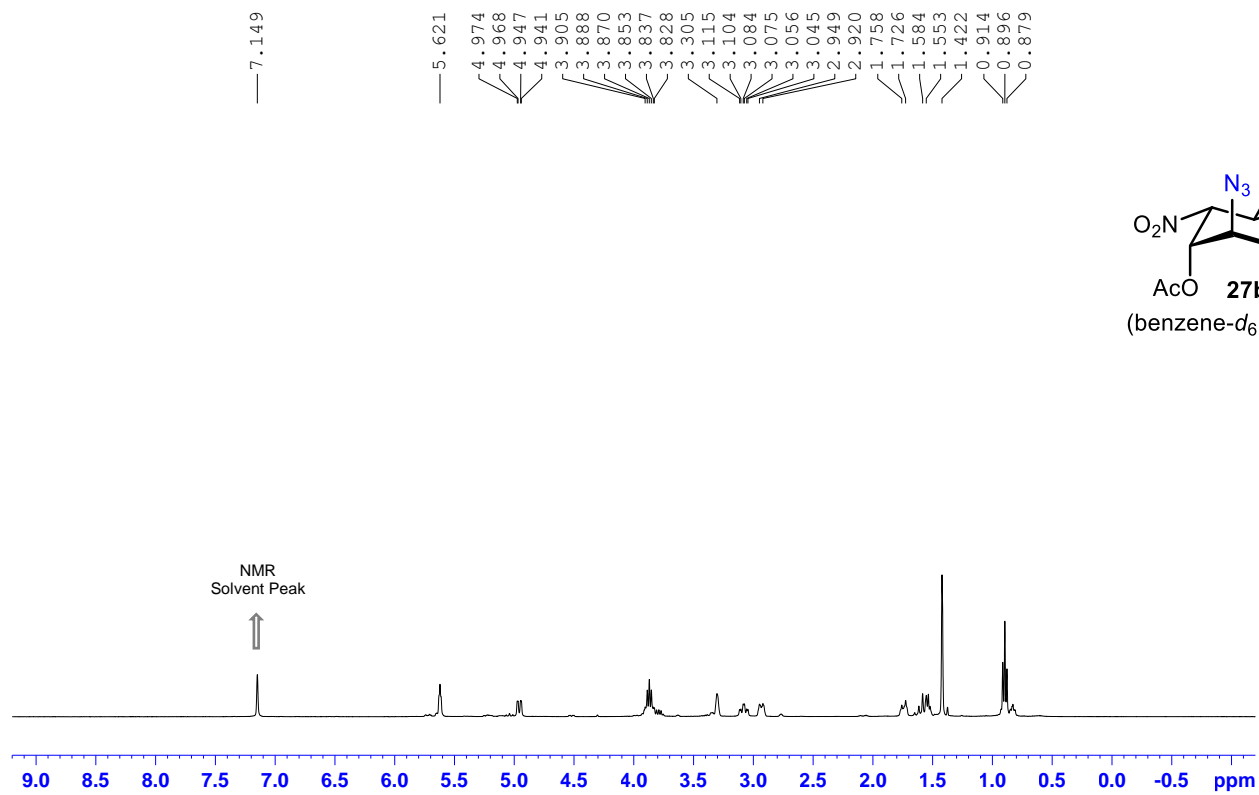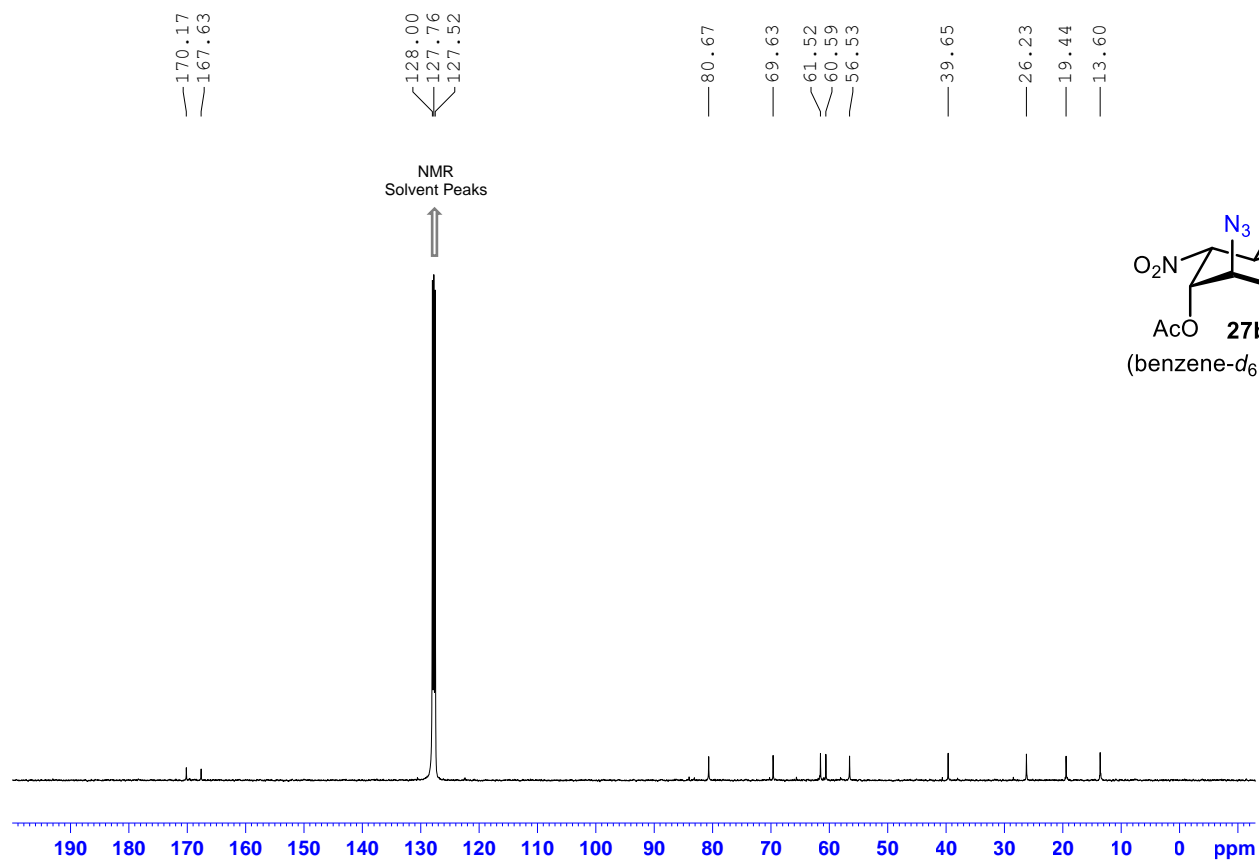

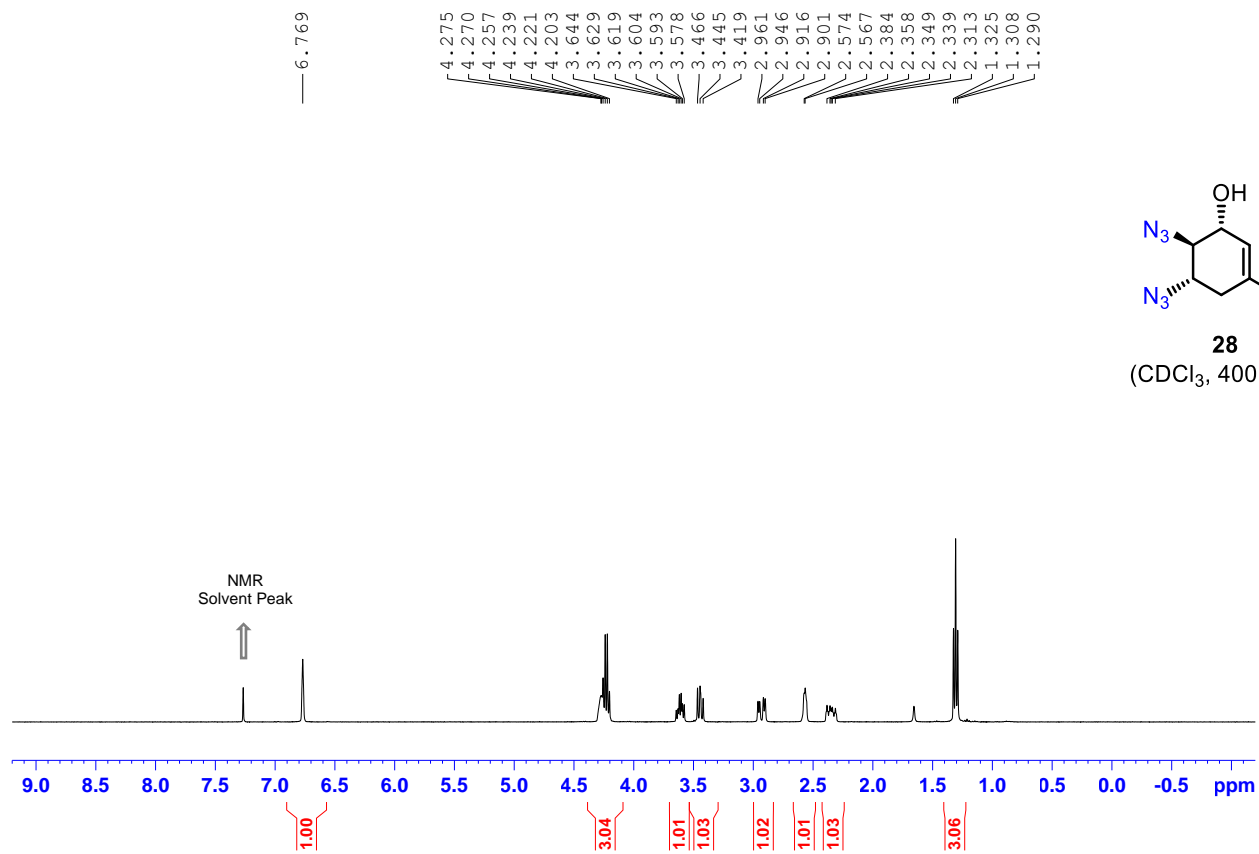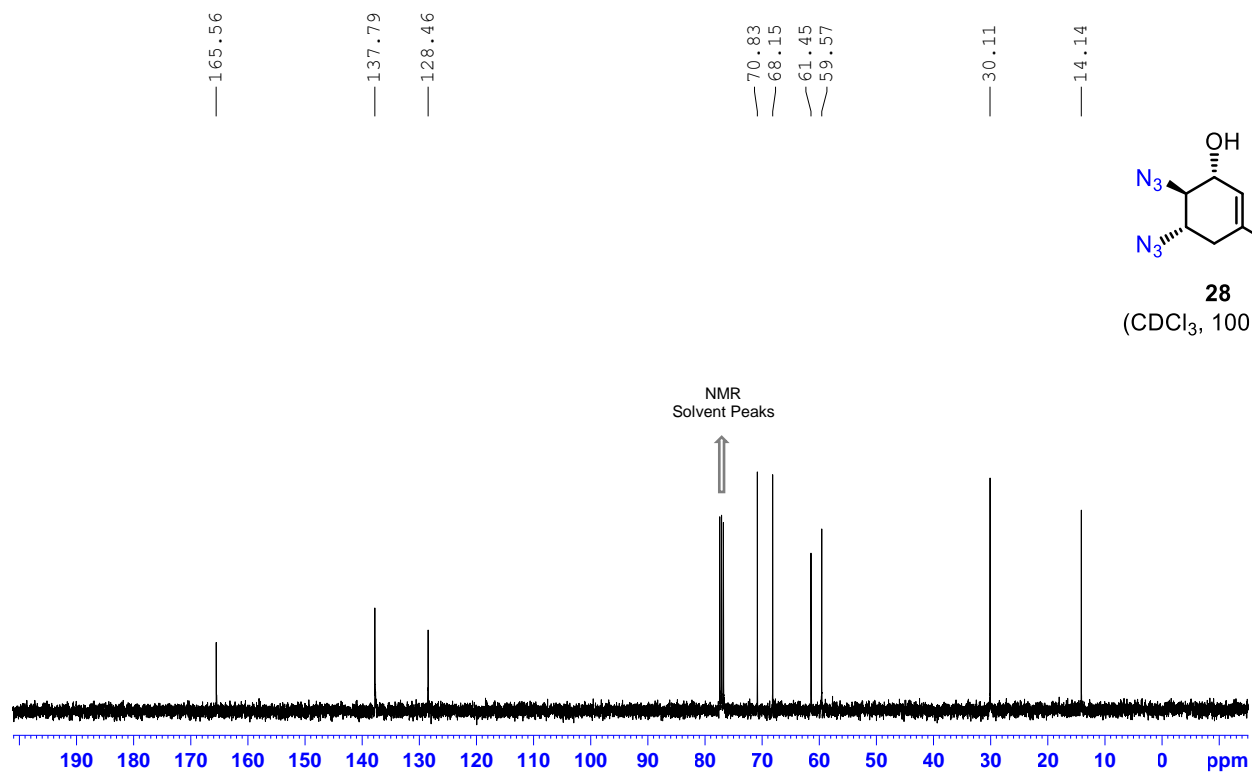

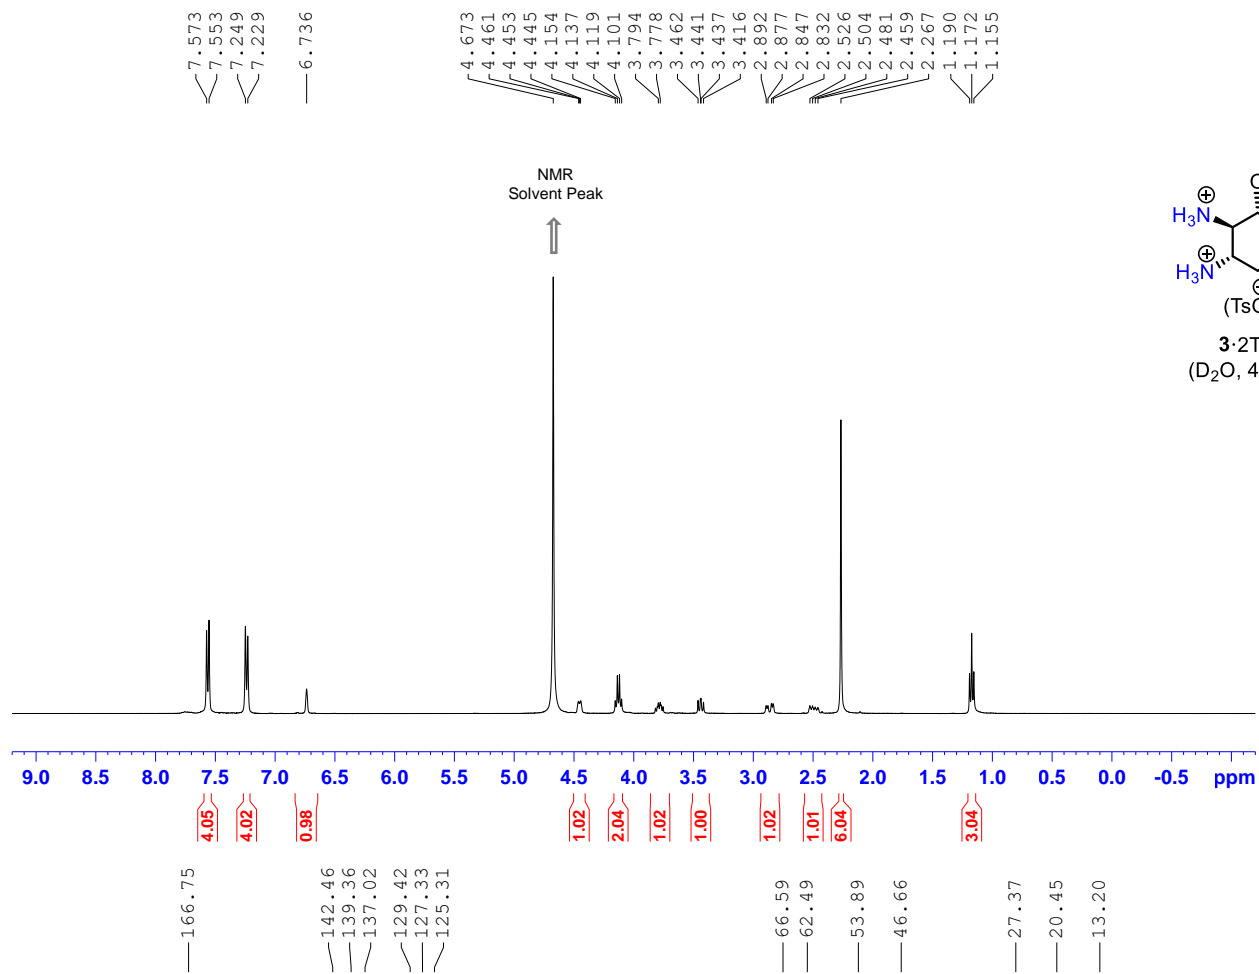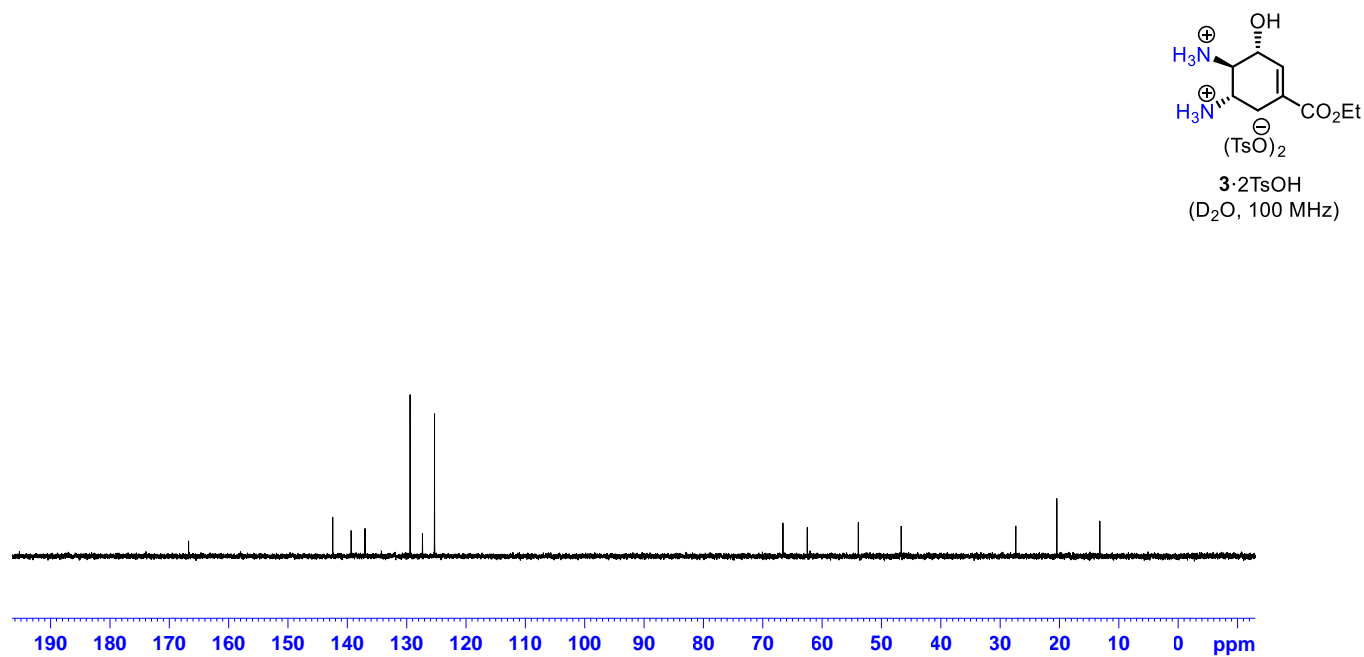

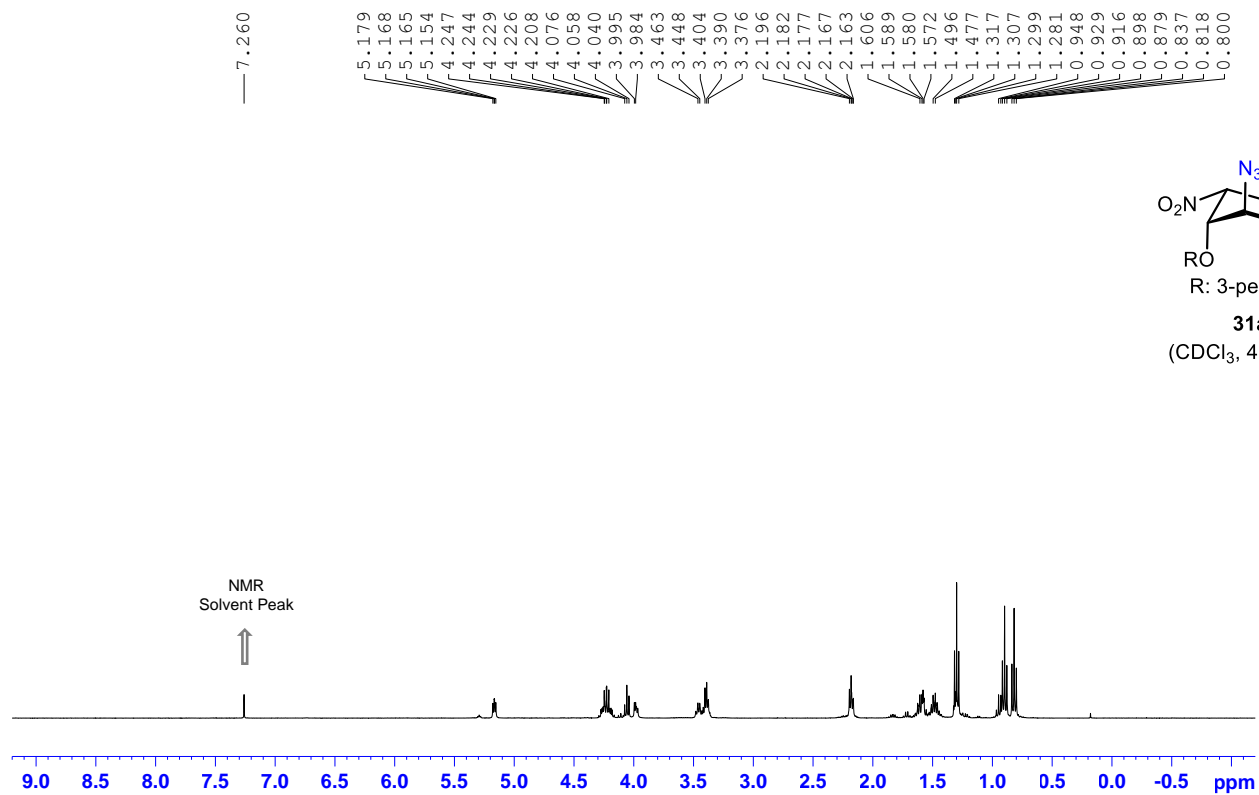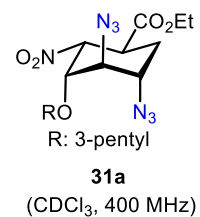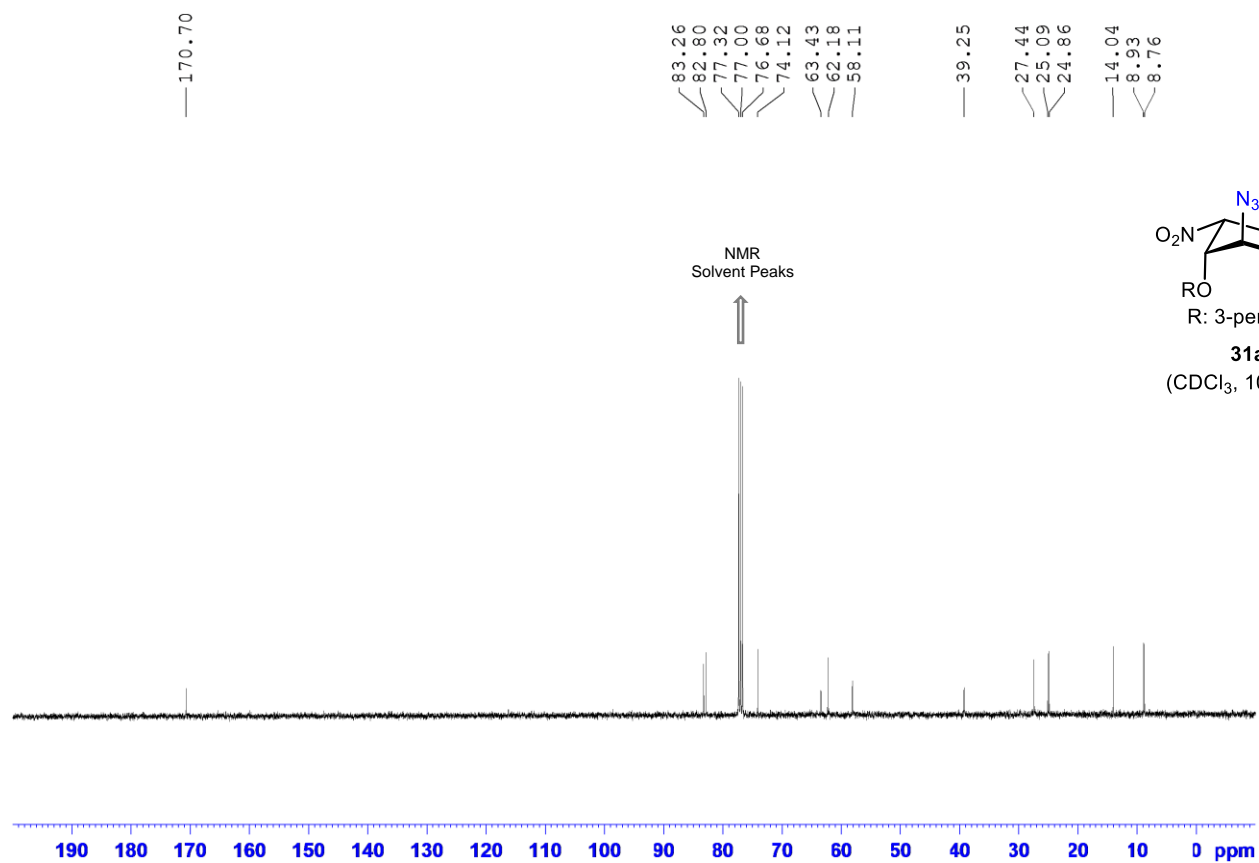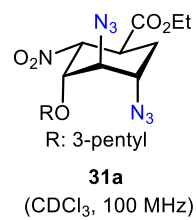

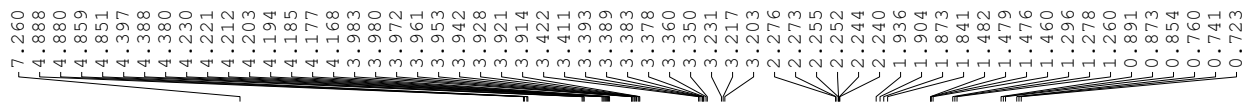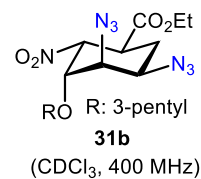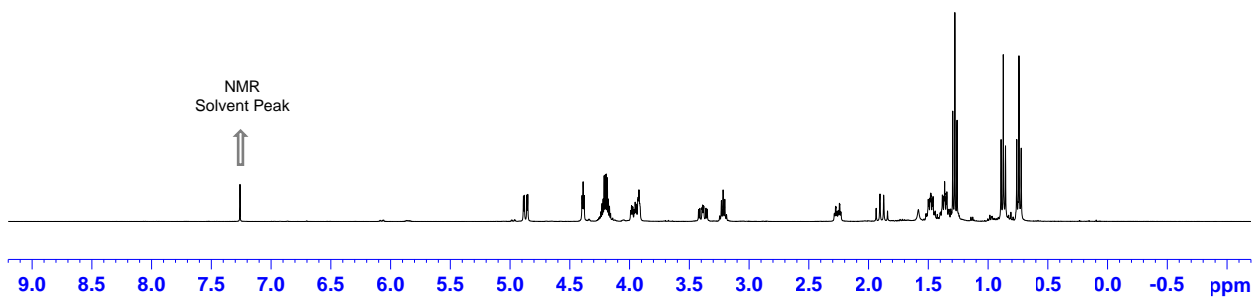

— 171.31

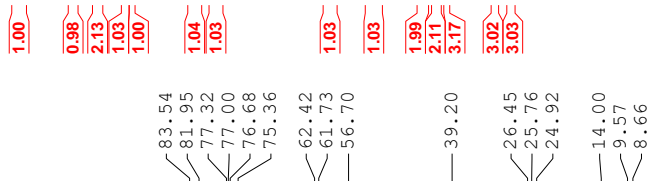

NMR Solvent Peaks

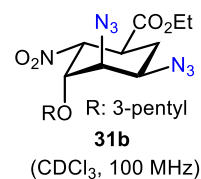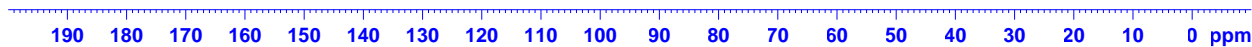

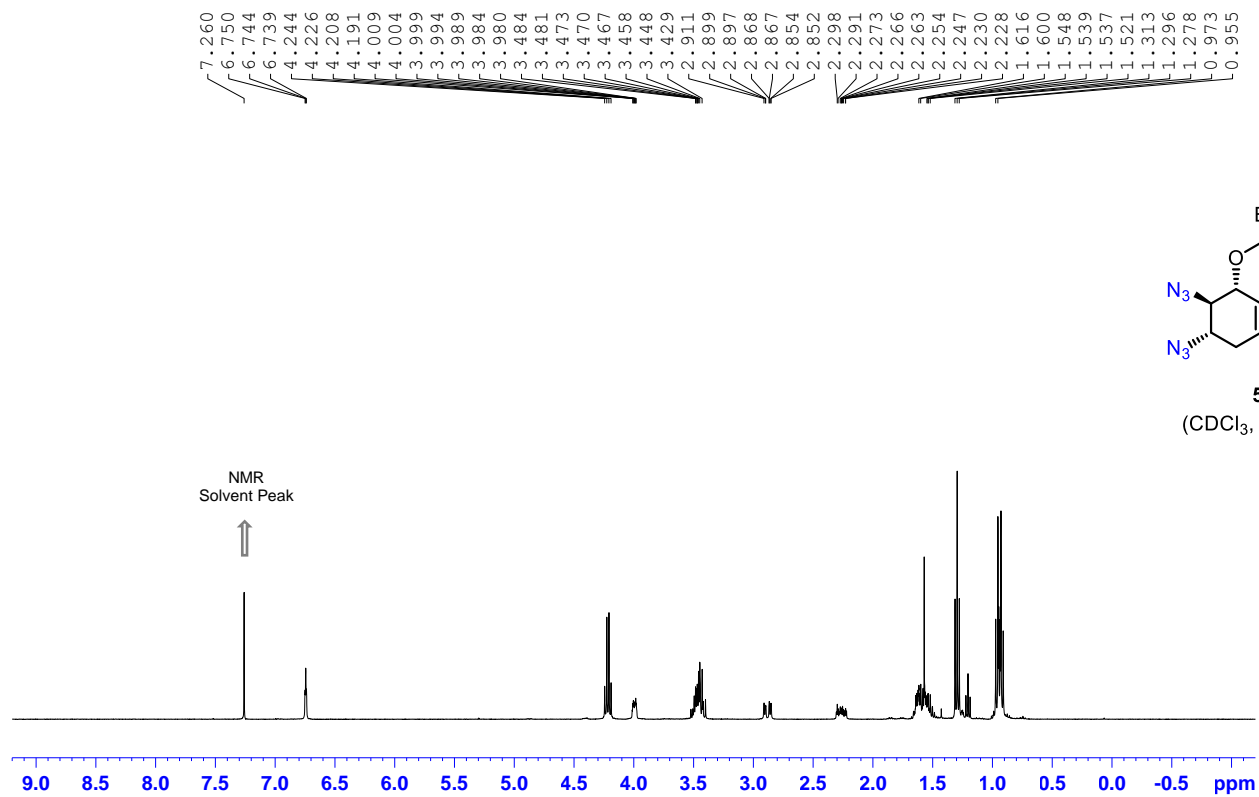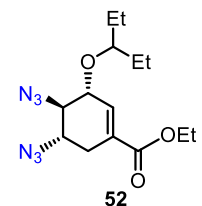

(CDCl<sub>3</sub>, 400 MHz)

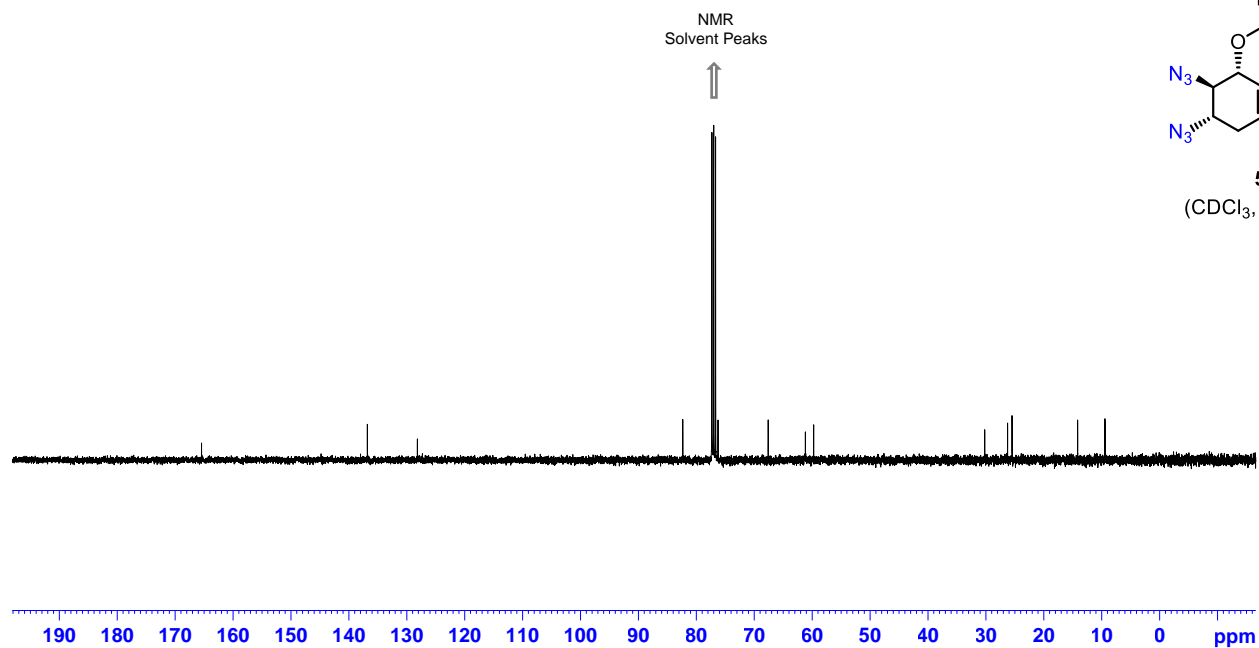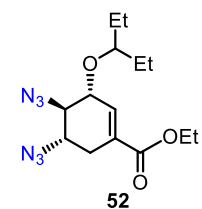

(CDCl<sub>3</sub>, 100 MHz)

7.260  
6.812  
6.808  
6.804  
4.246  
4.228  
4.210  
4.193  
4.142  
4.137  
4.132  
4.128  
4.123  
4.119  
4.024  
4.018  
4.011  
4.009  
4.005  
4.003  
3.997  
3.990  
3.723  
3.717  
3.708  
3.702  
3.425  
3.411  
3.396  
2.723  
2.717  
2.711  
2.682  
2.678  
2.672  
2.666  
2.661  
2.603  
2.599  
2.596  
2.588  
2.584  
2.580  
2.557  
2.554  
2.542  
2.539  
1.604  
1.585  
1.571  
1.567  
1.553  
1.317  
1.299  
1.281  
1.0957  
1.0938  
0.918  
0.899

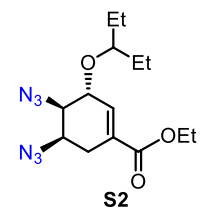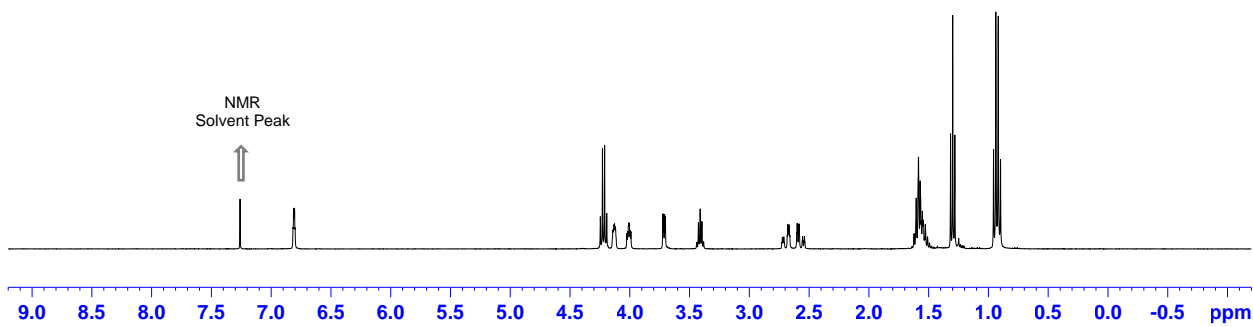

165.68  
134.99  
128.89  
82.21  
77.32  
77.00  
76.68  
72.90  
63.21  
61.09  
57.86  
27.74  
26.31  
25.79  
14.17  
9.71  
9.34

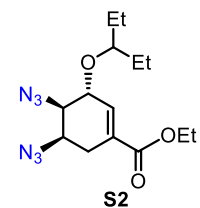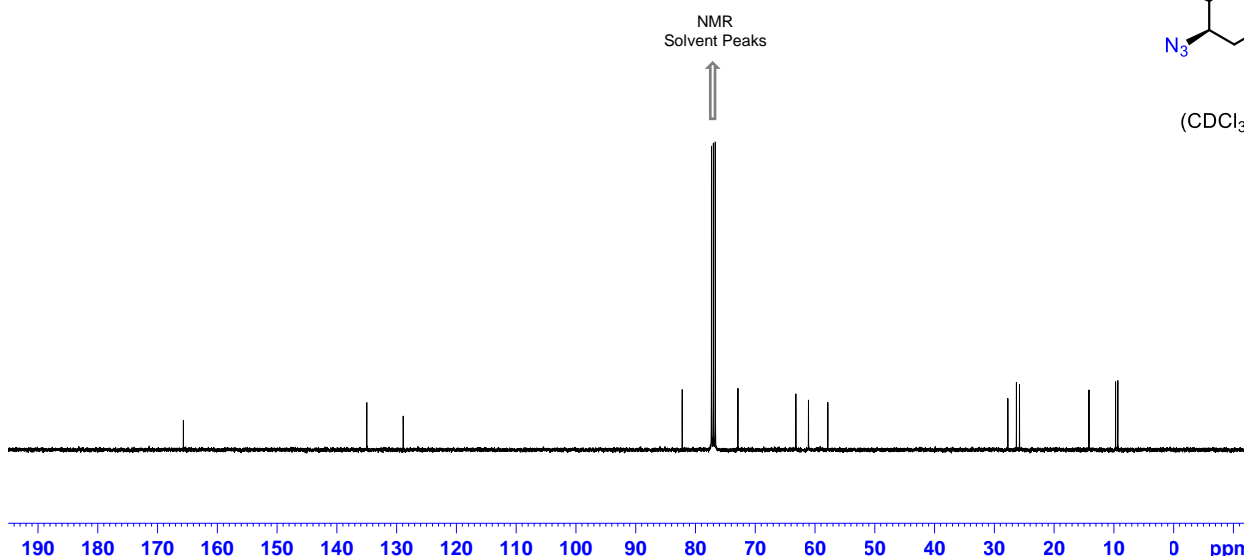



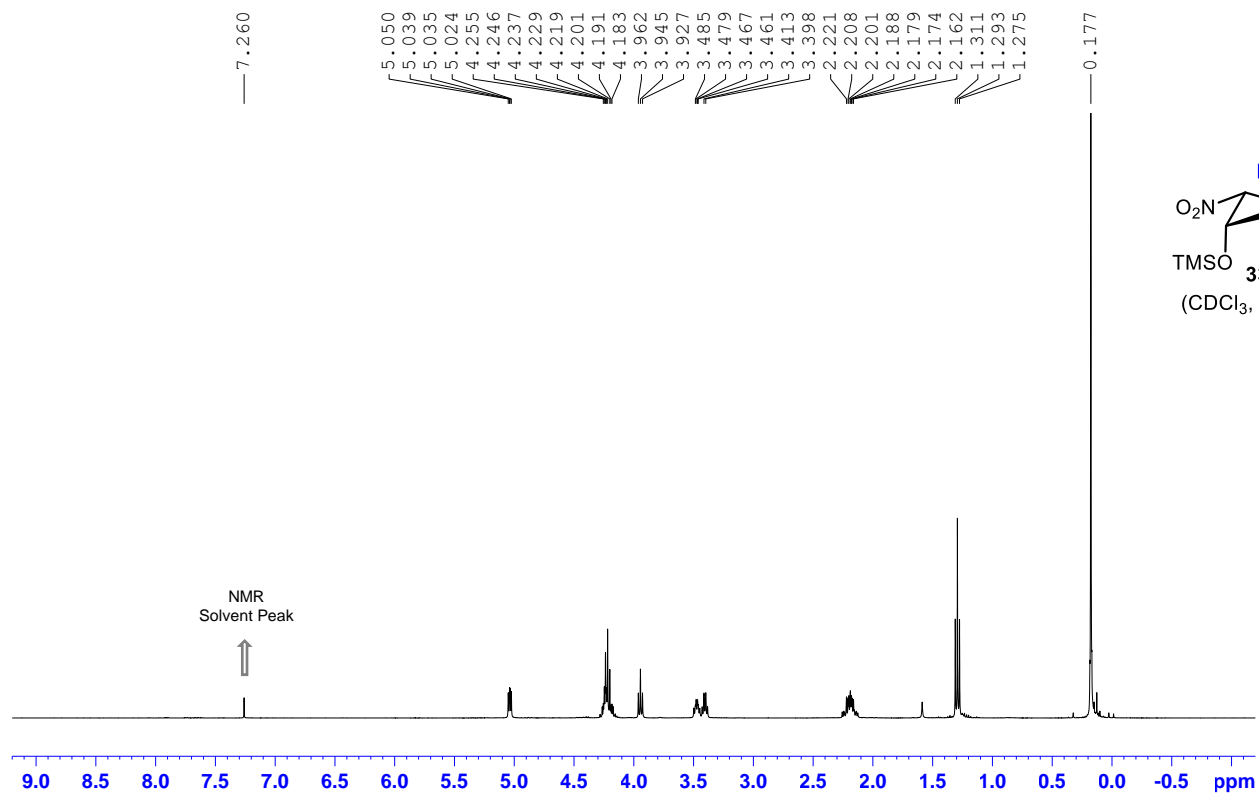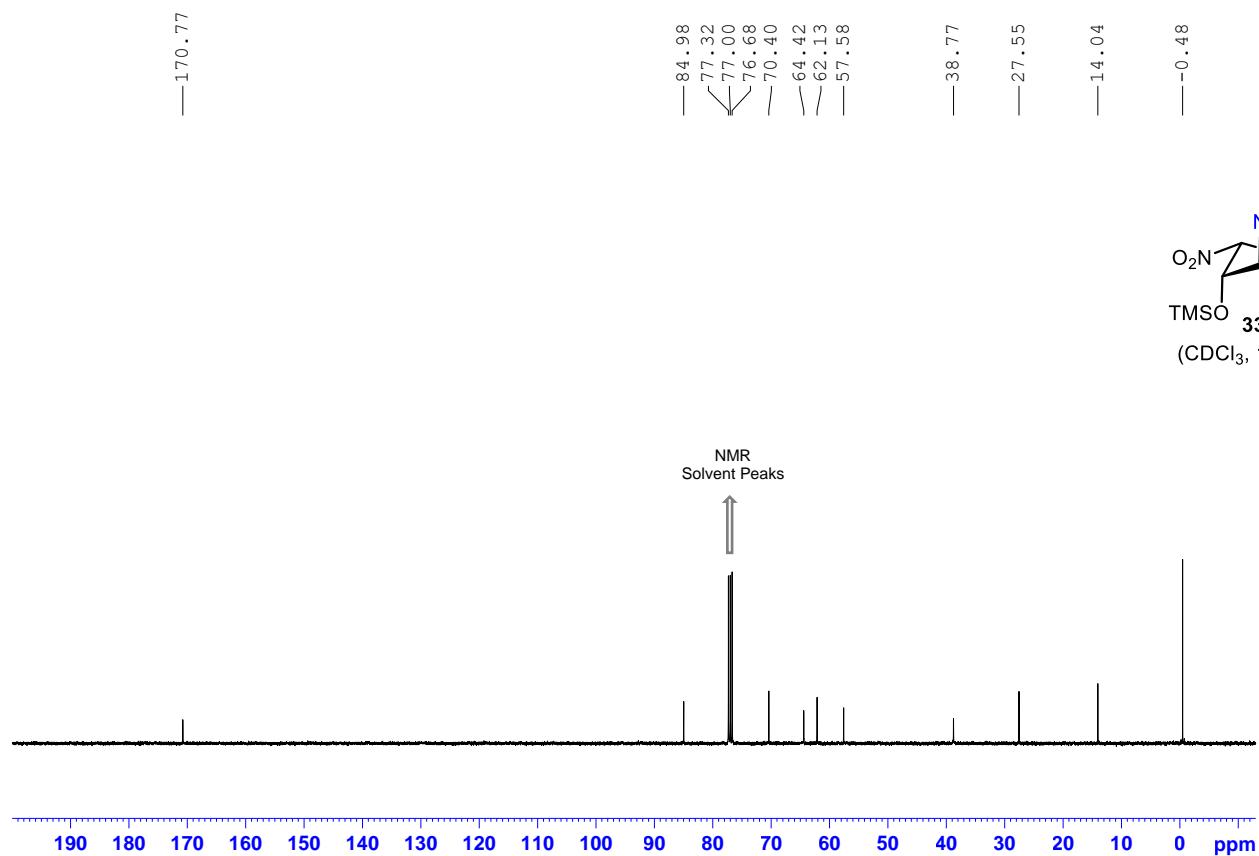

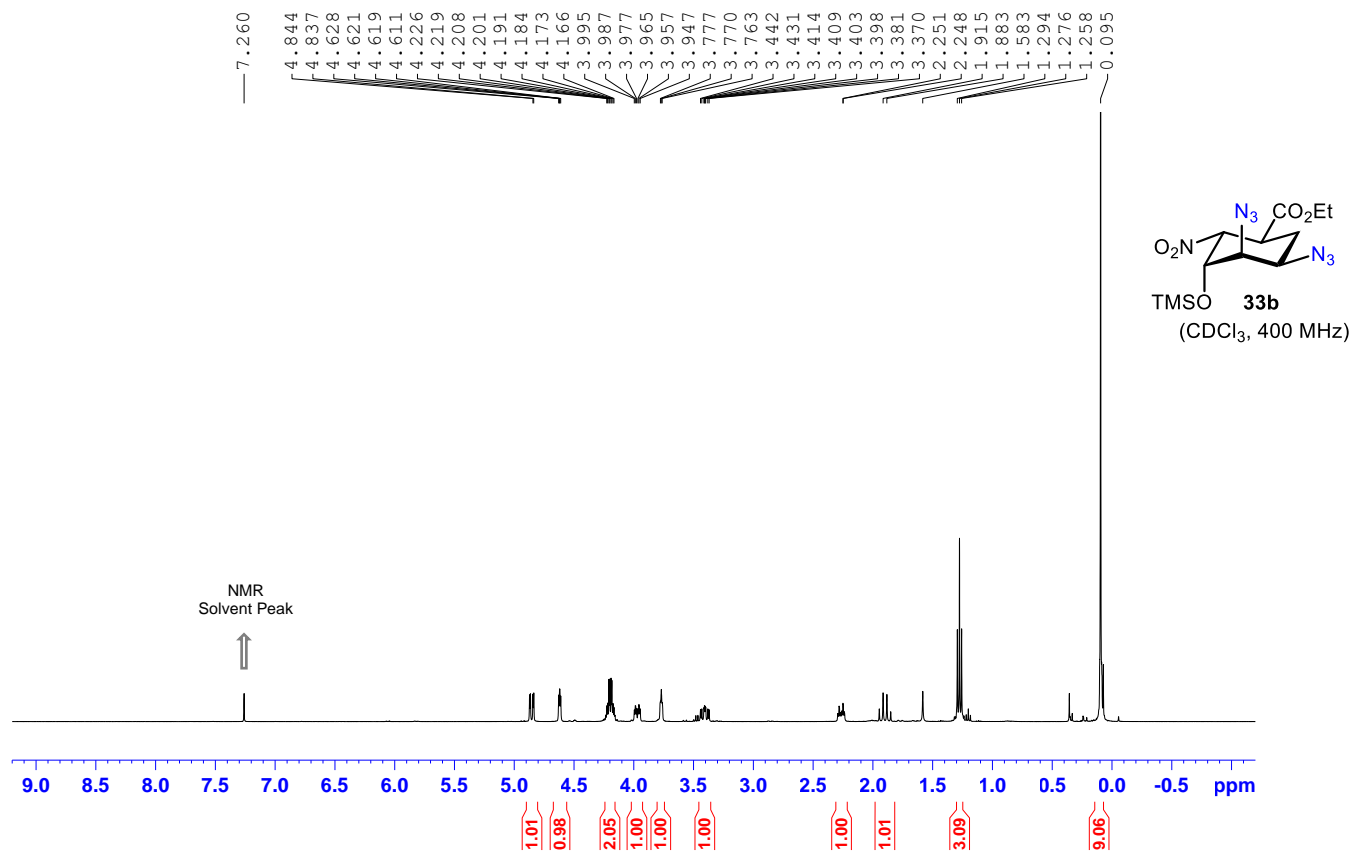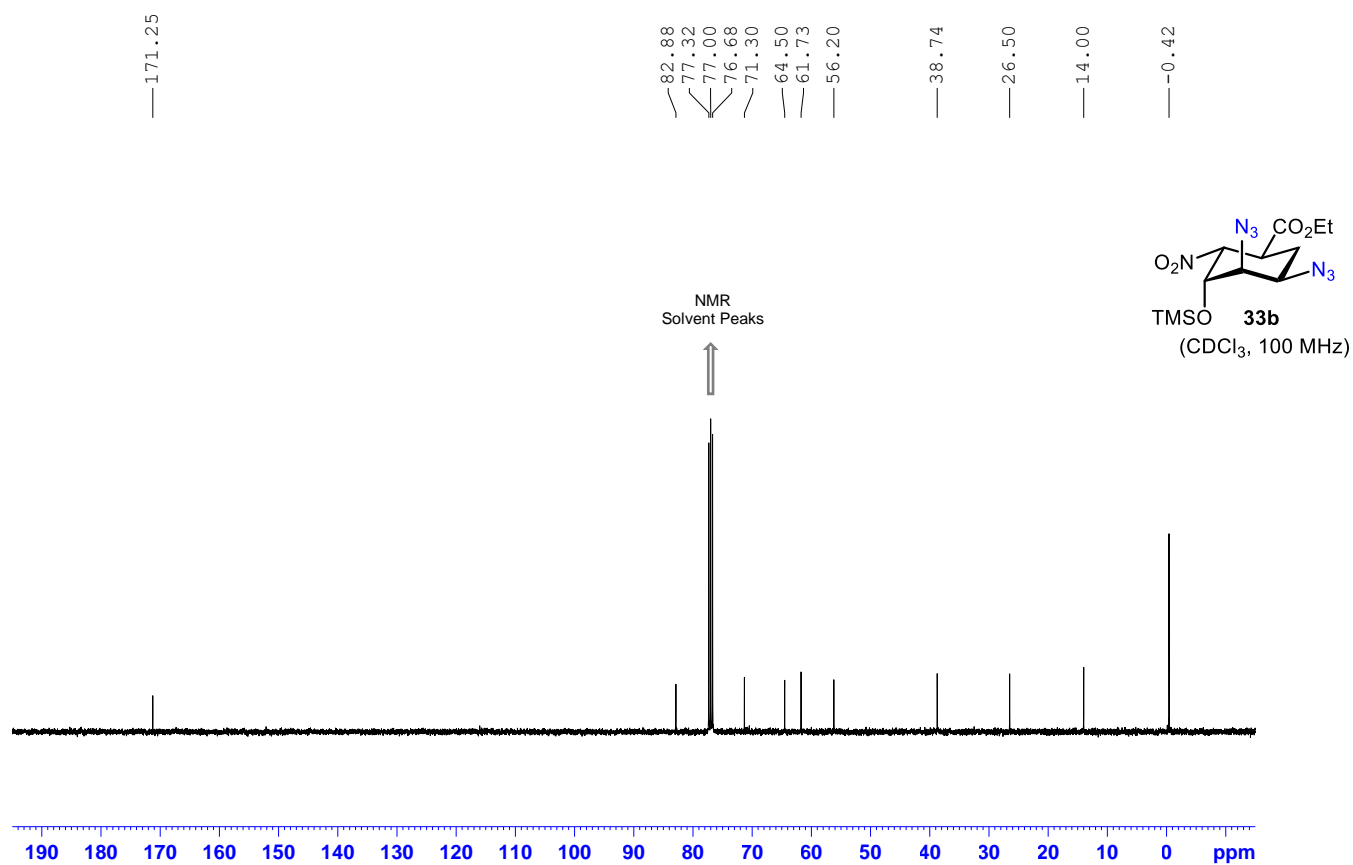



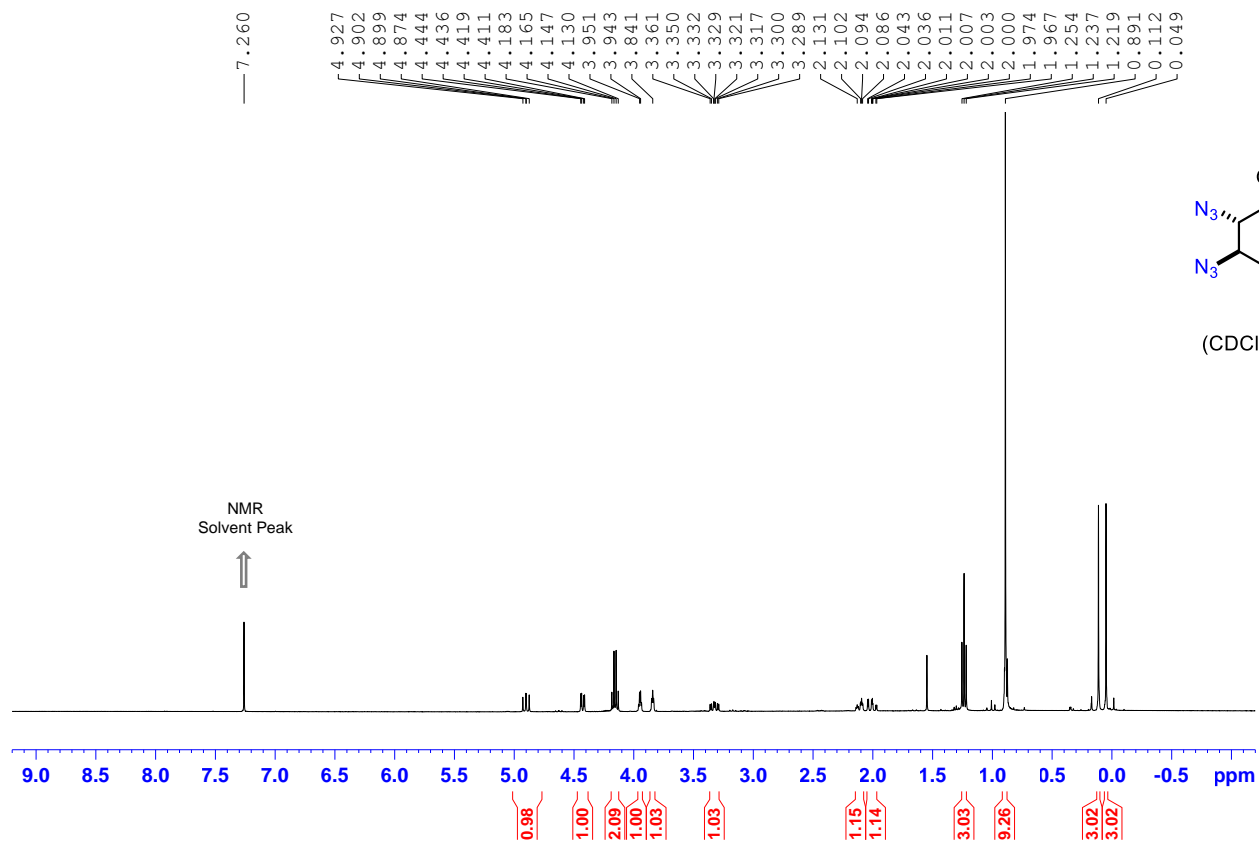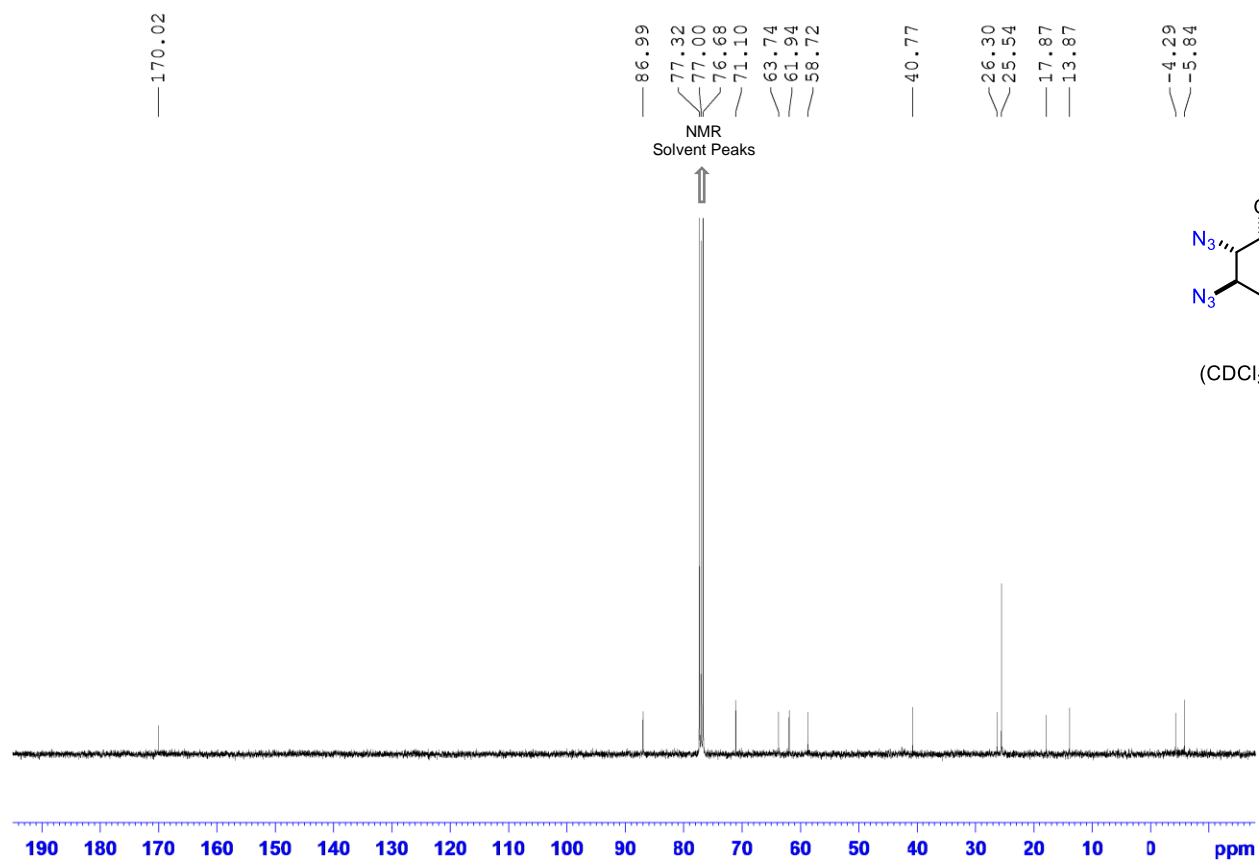

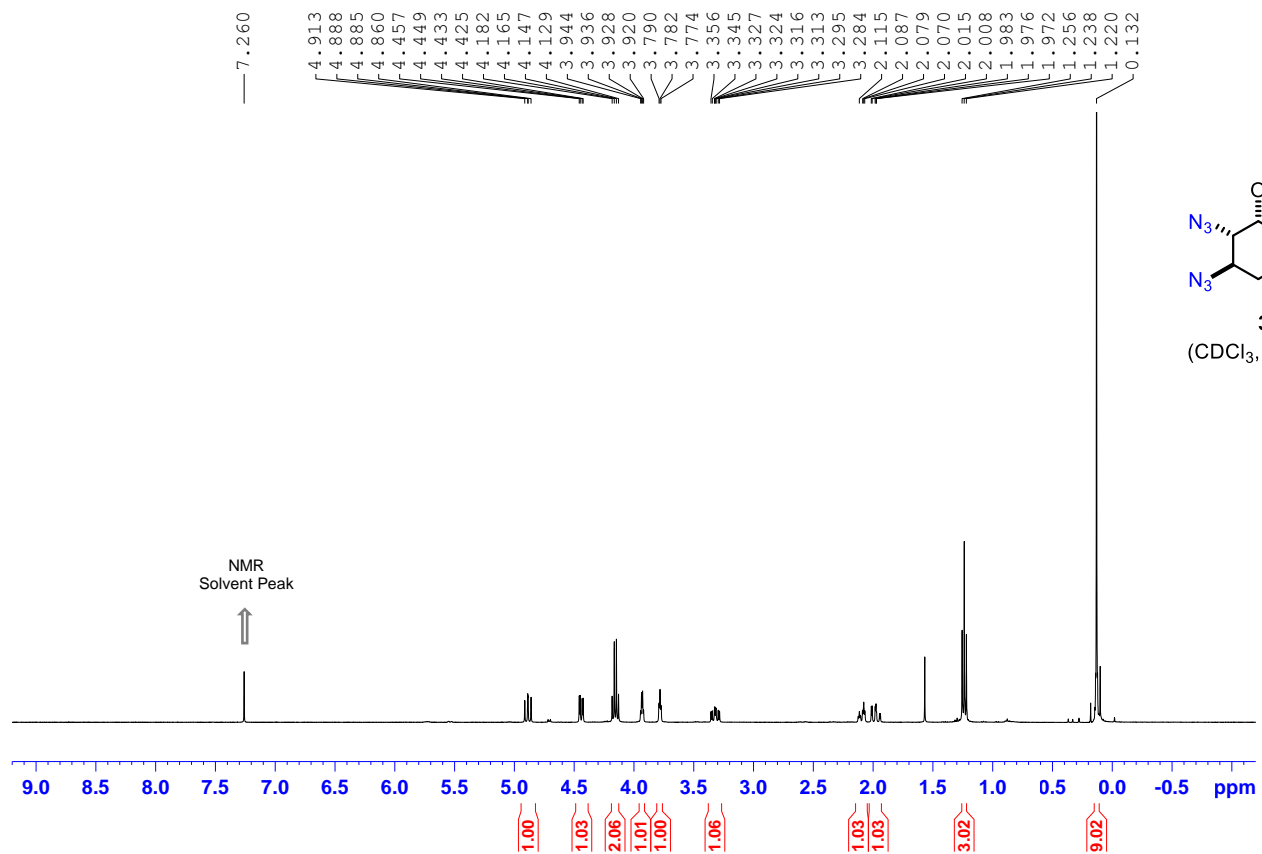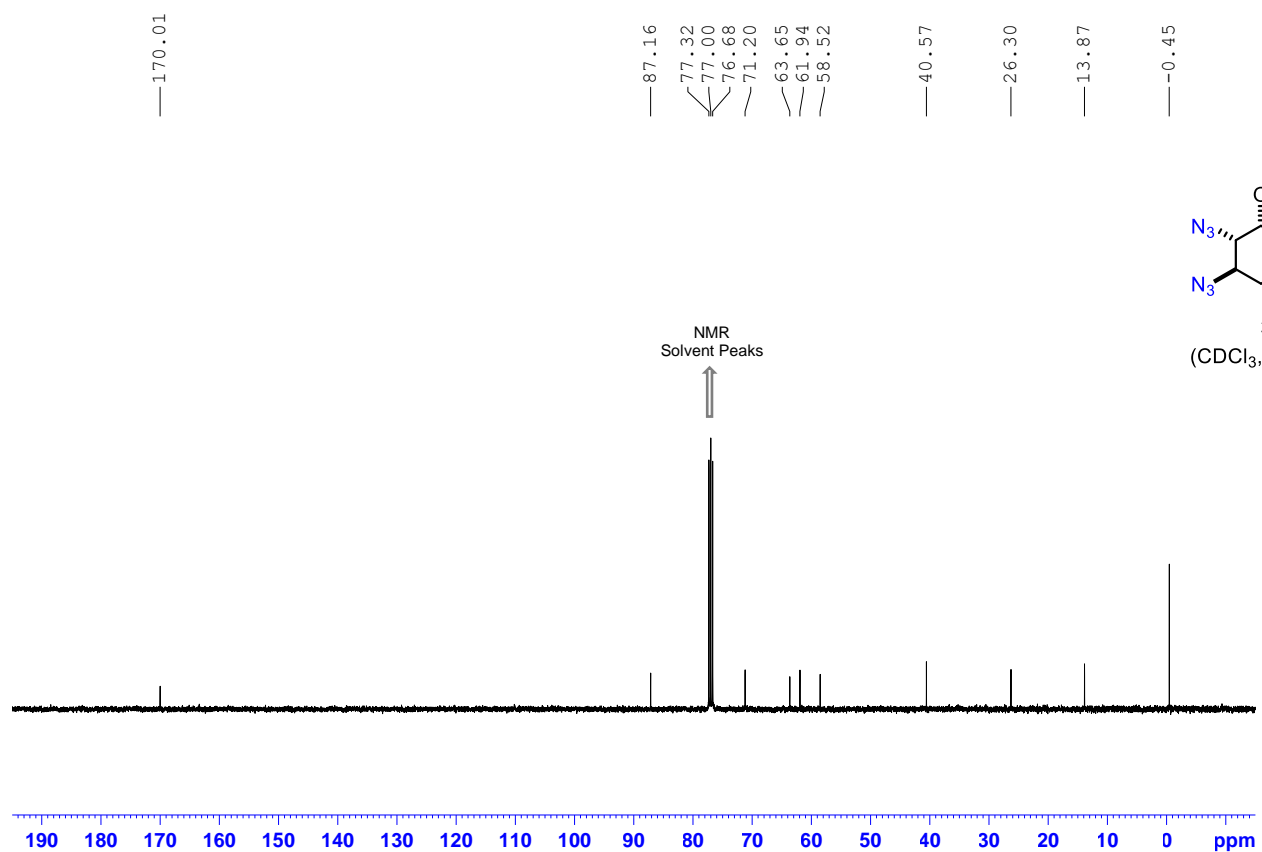

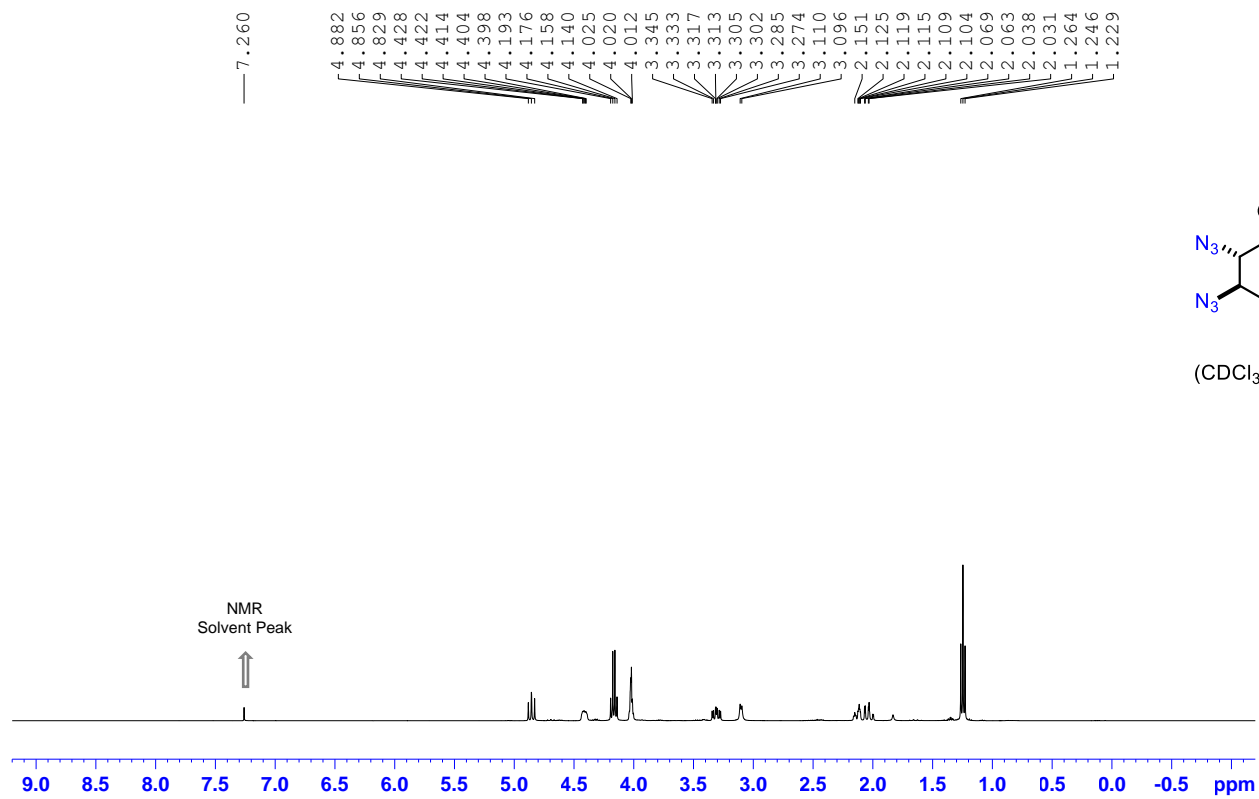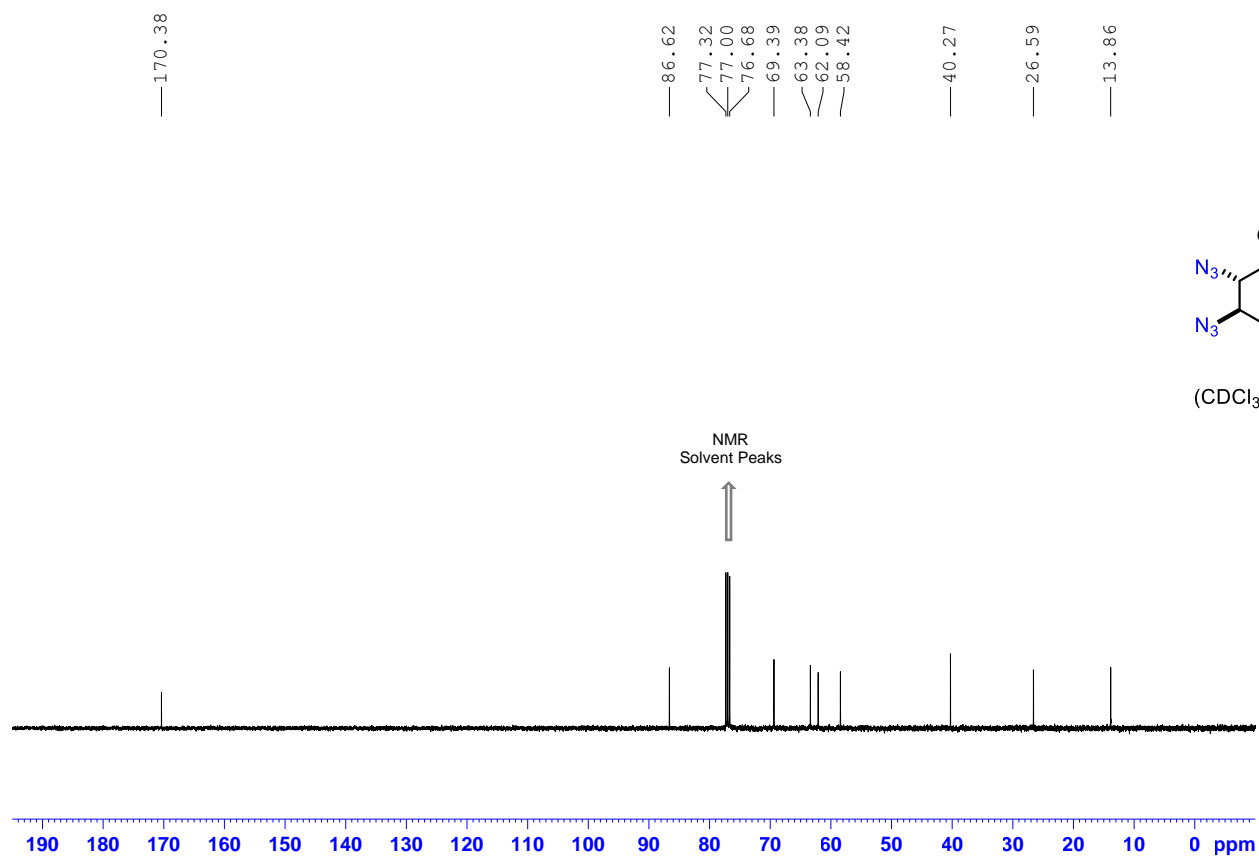

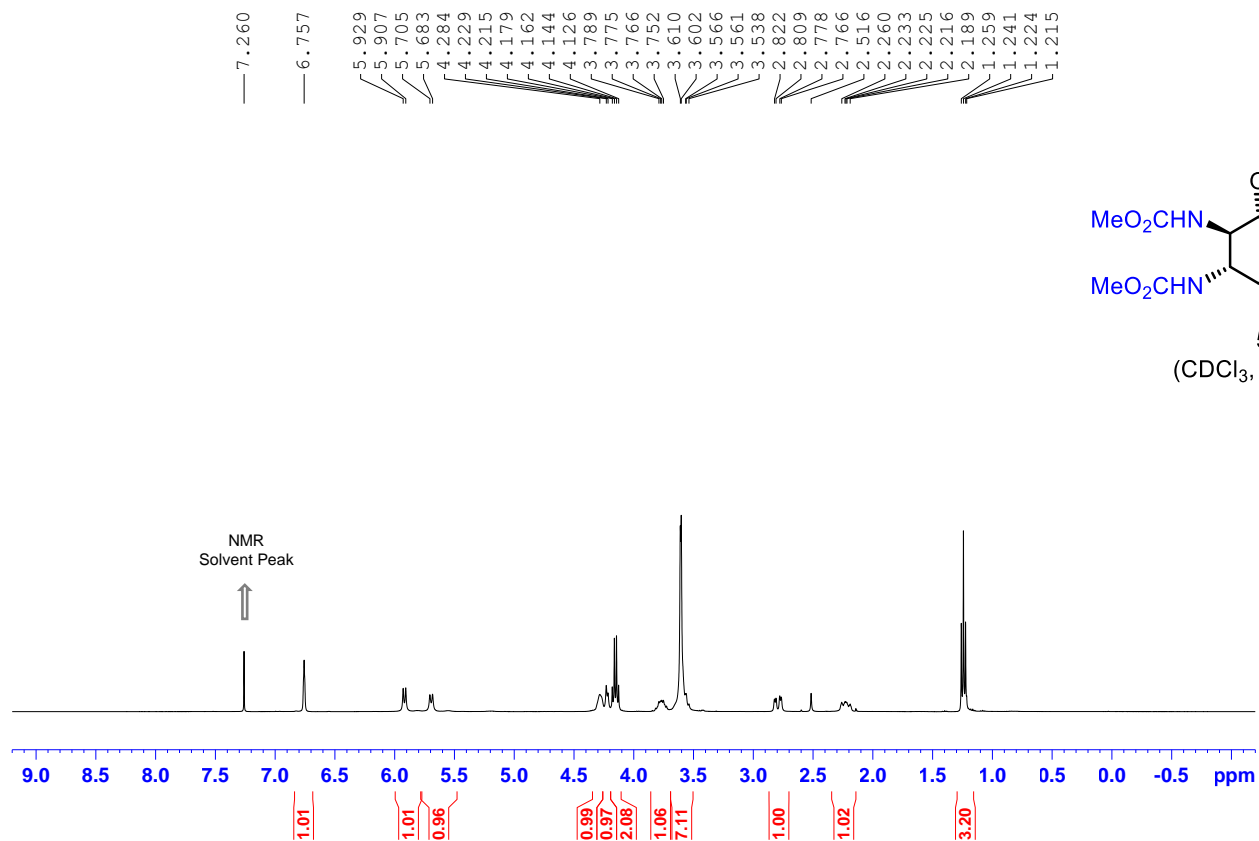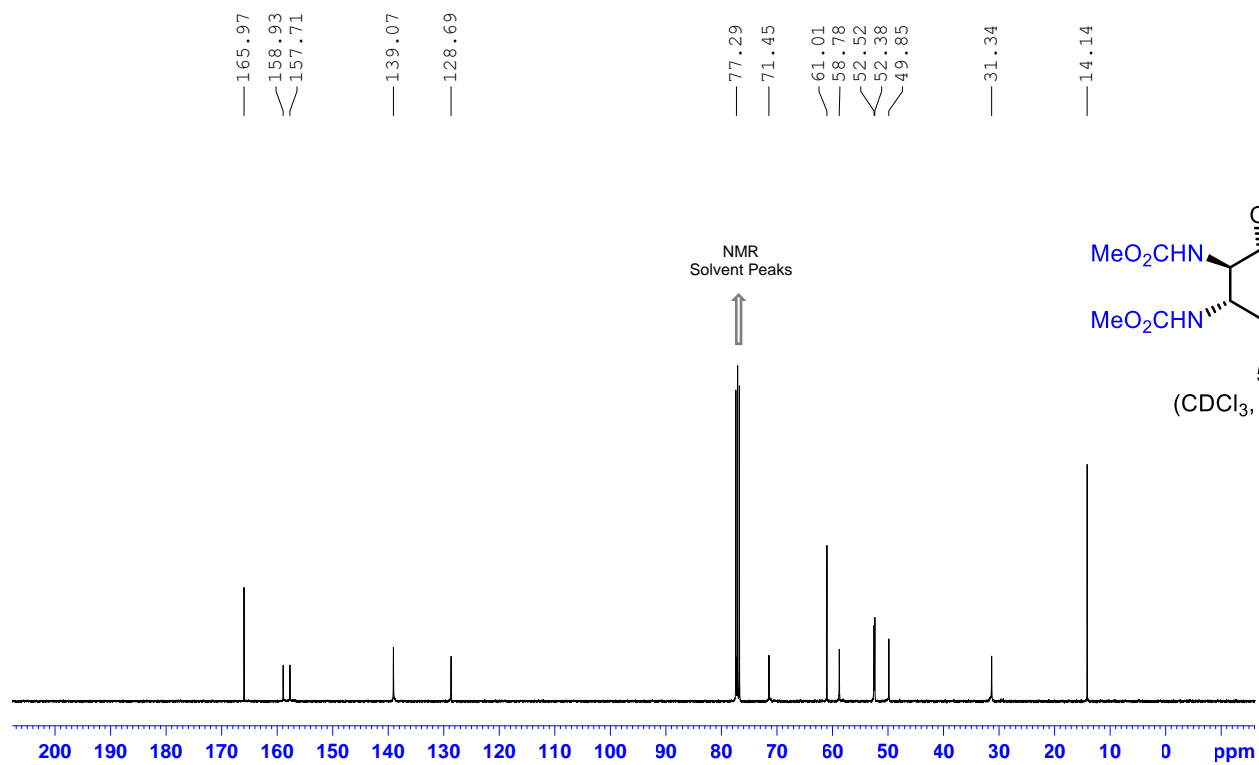

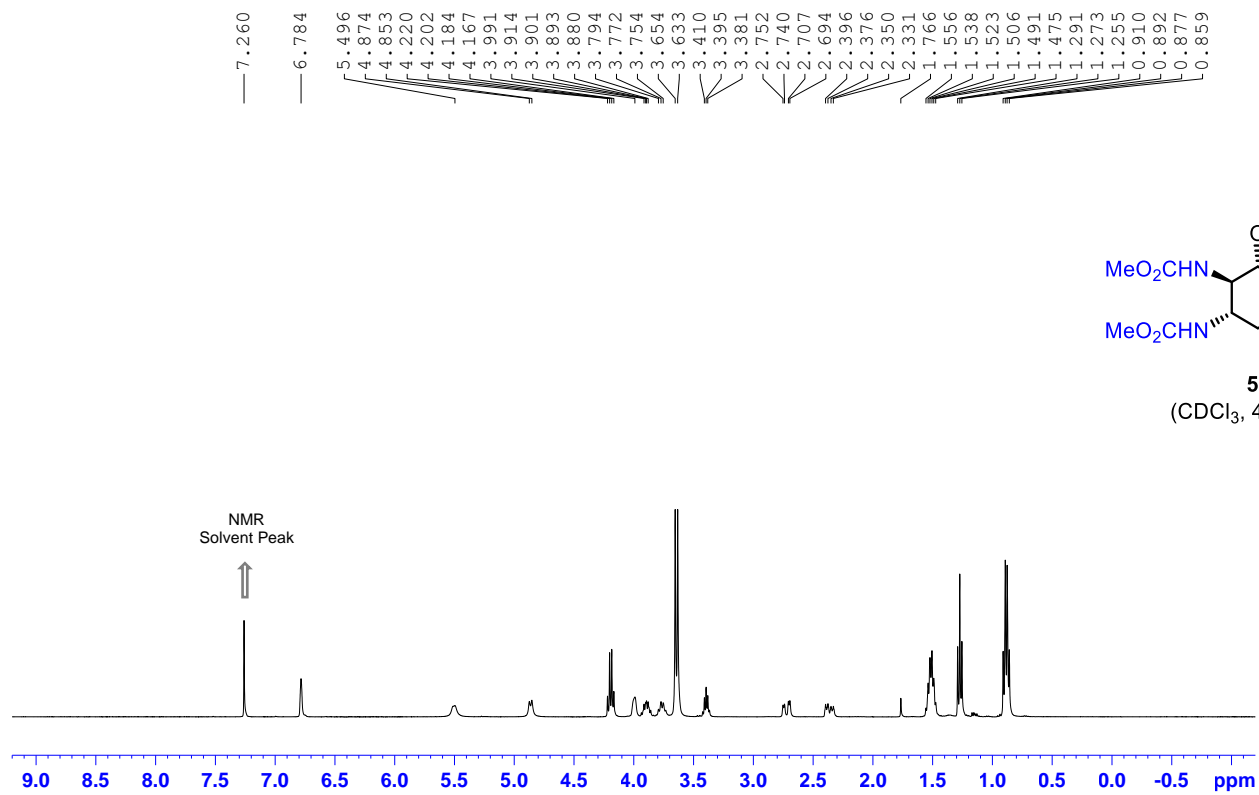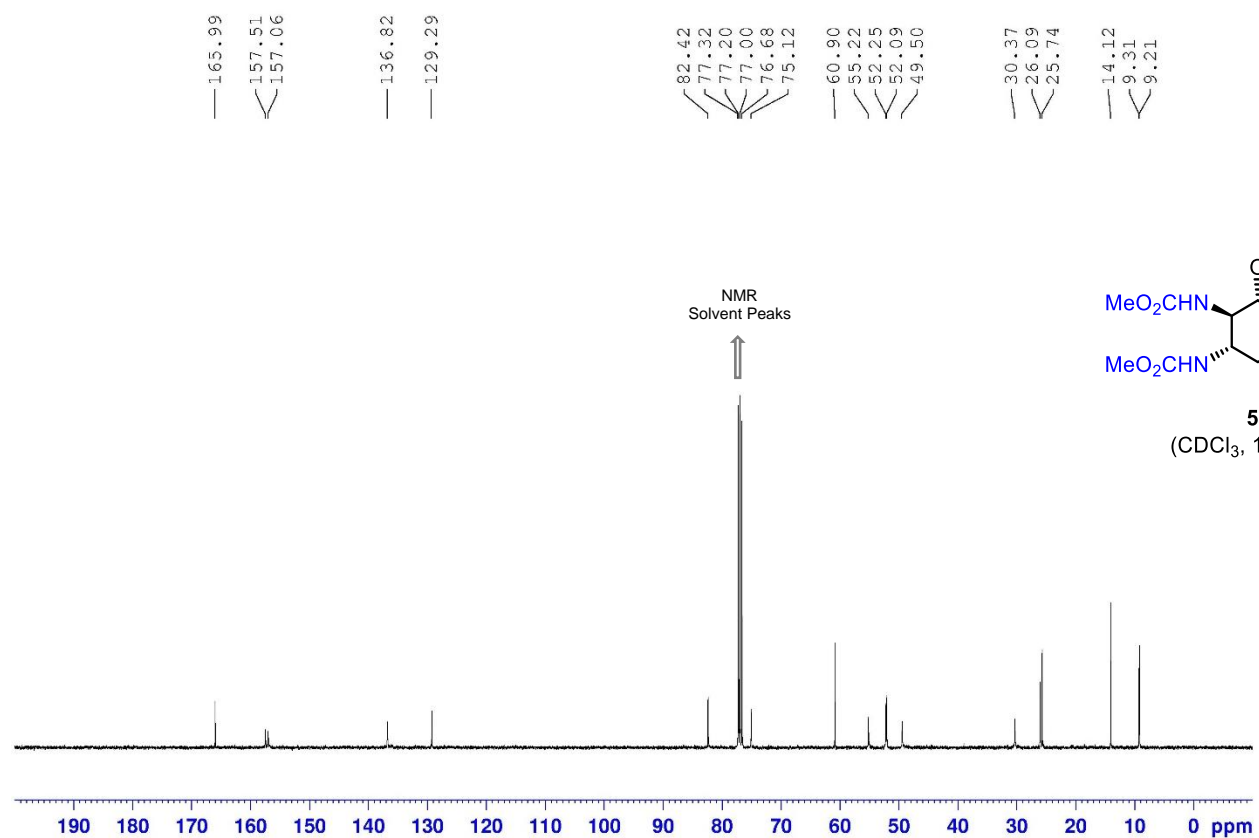



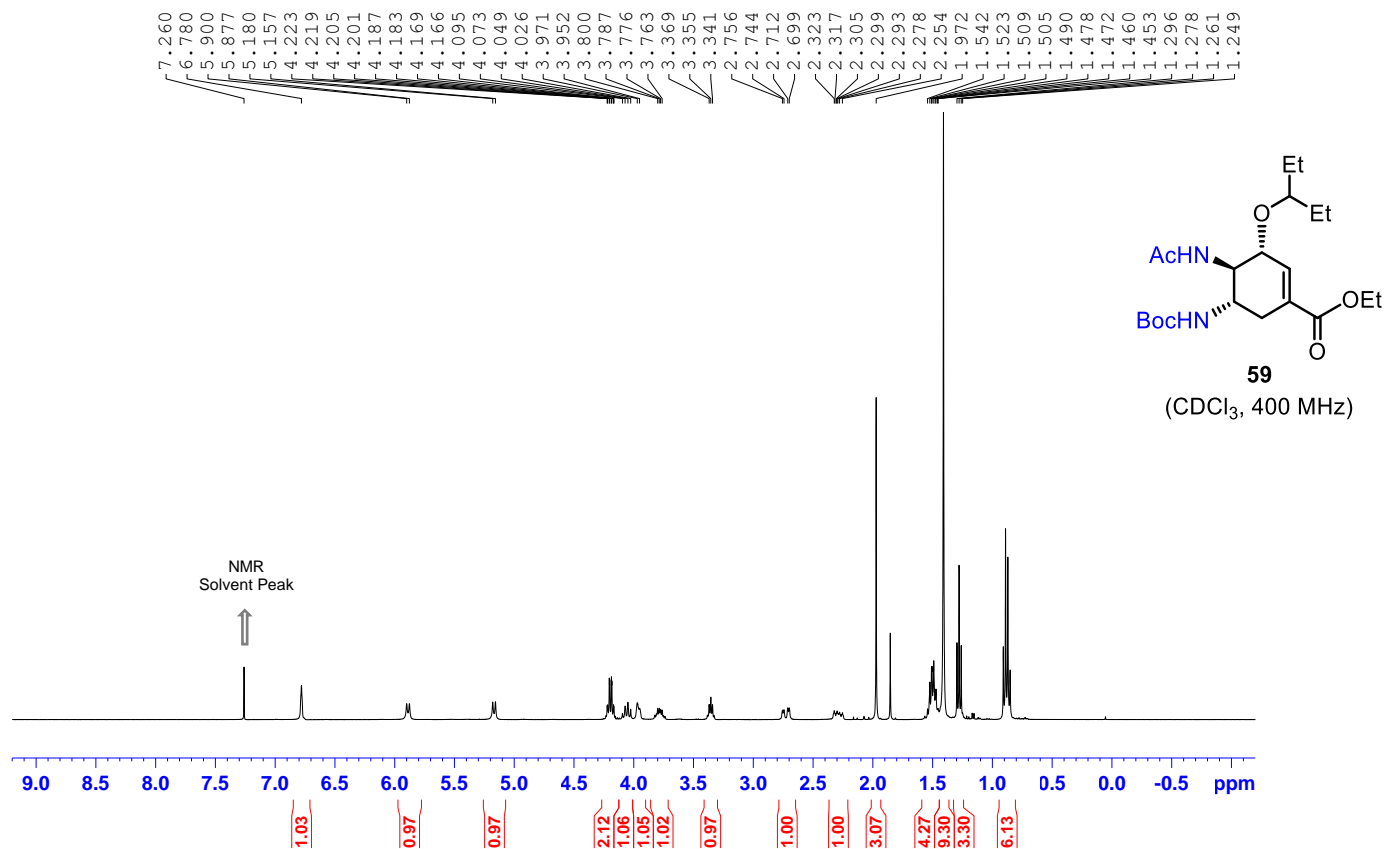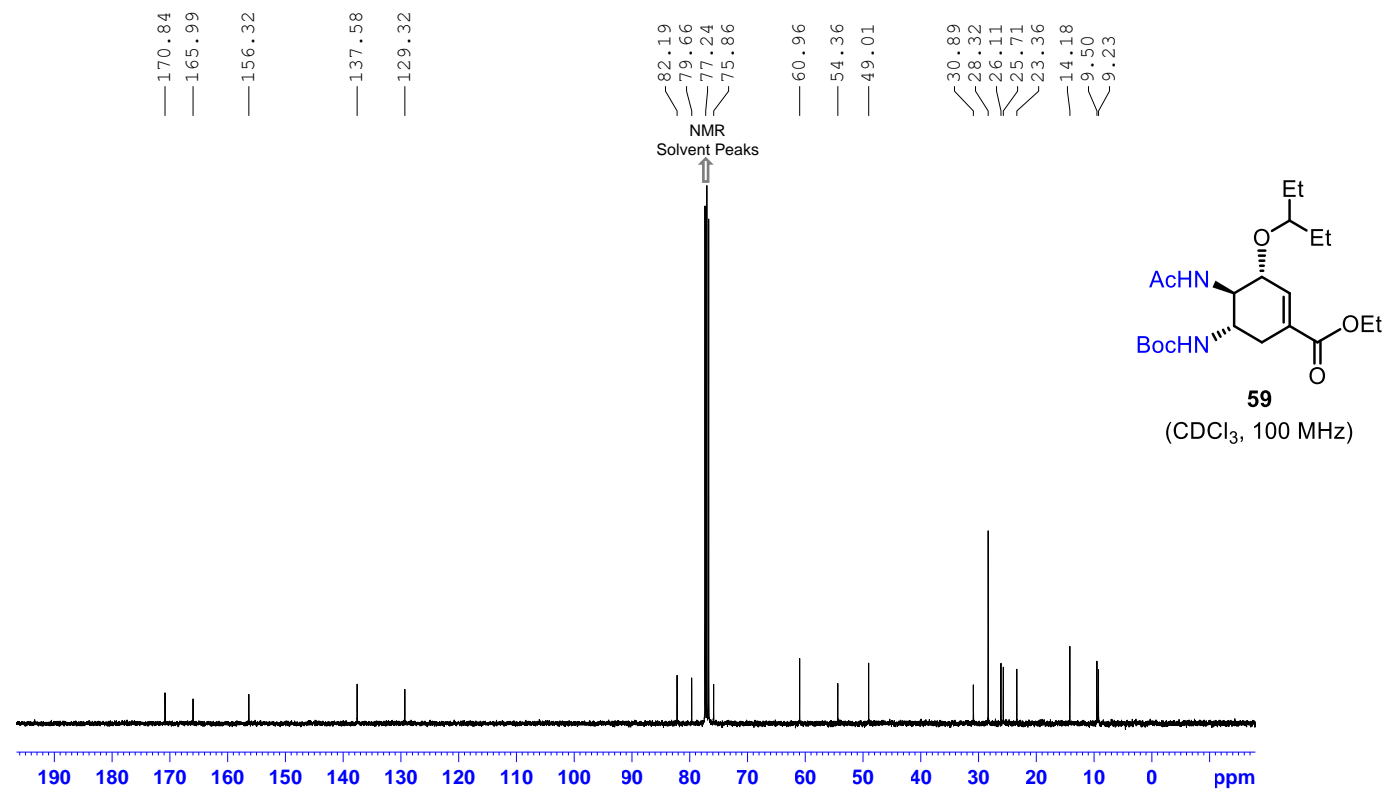

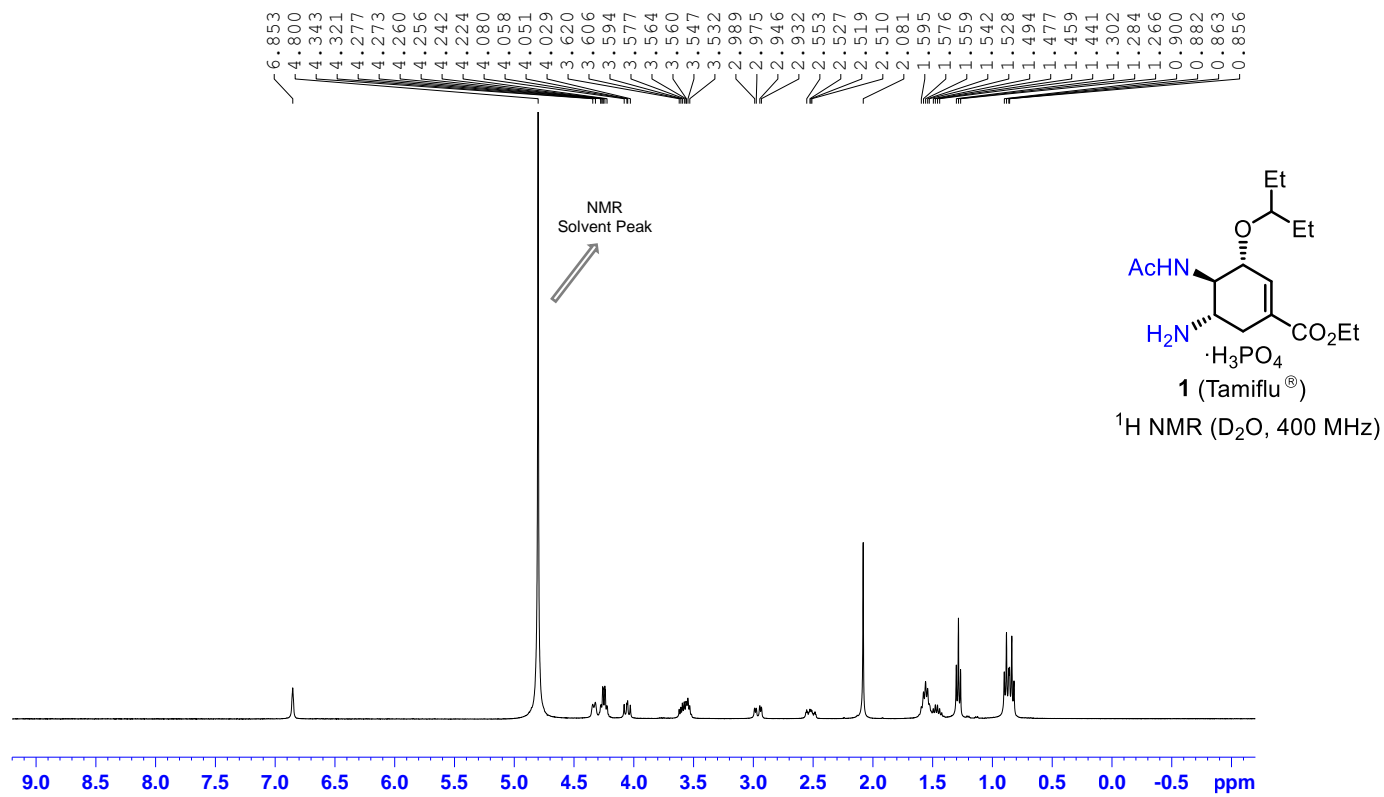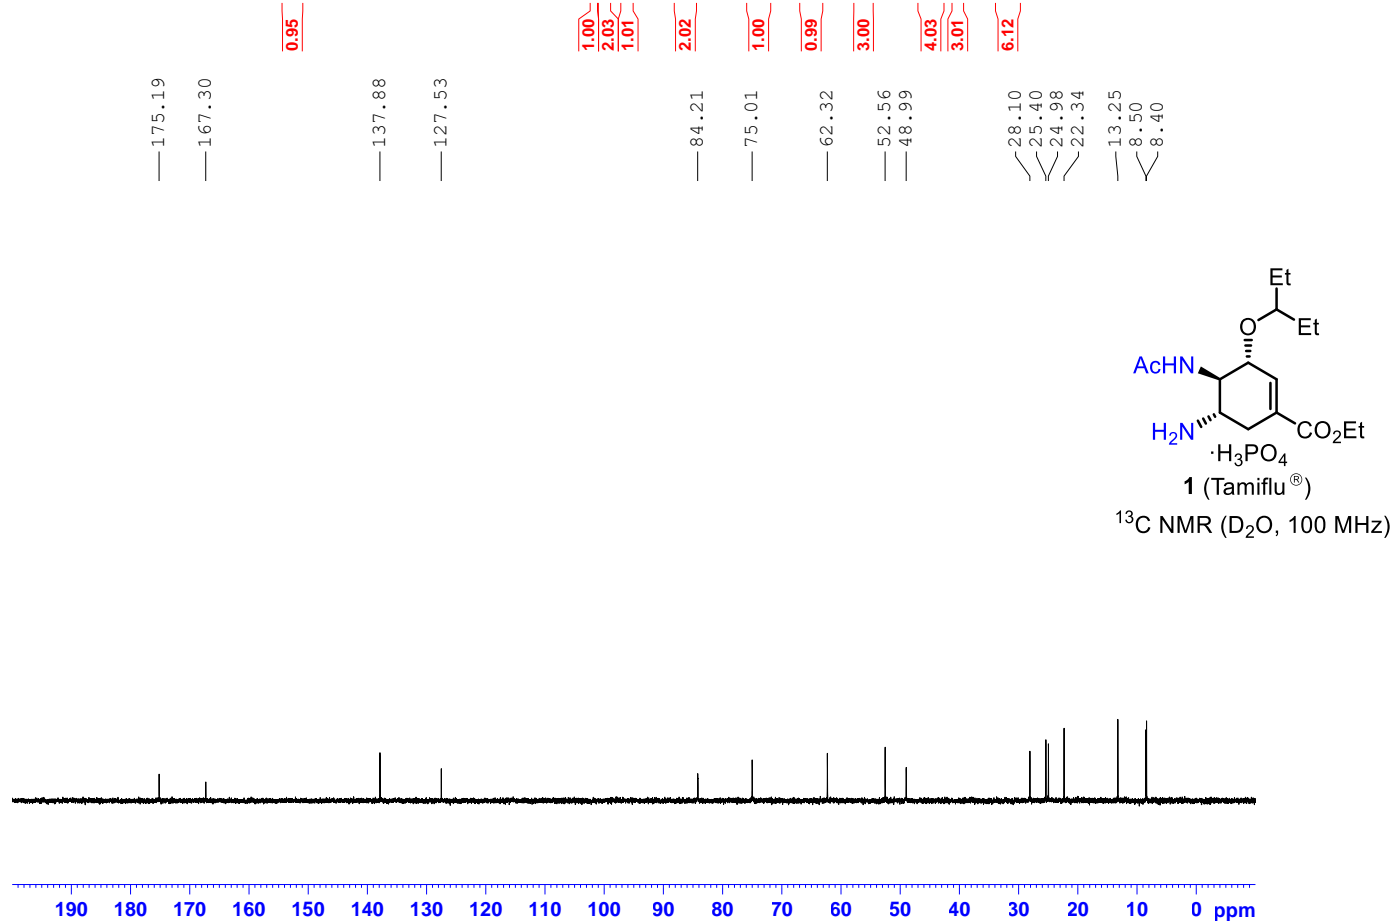

7.260  
6.743  
6.738  
6.708  
4.243  
4.240  
4.225  
4.223  
4.207  
4.205  
4.189  
4.187  
4.028  
3.970  
3.755  
3.740  
3.695  
3.681  
3.496  
3.482  
3.470  
3.456  
3.447  
3.444  
3.439  
3.428  
3.420  
3.412  
2.892  
2.849  
2.269  
2.252  
1.585  
1.453  
1.438  
1.432  
1.426  
1.420  
1.412  
1.405  
1.392  
1.386  
1.375  
1.363  
1.313  
1.311  
1.296  
1.293  
1.278  
1.275  
1.256  
1.241  
1.214  
1.198  
1.0963  
1.0945  
1.0929  
0.918  
0.912

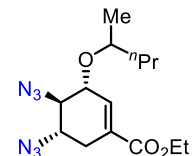

**54** *dr*: 1:1  
(CDCl<sub>3</sub>, 400 MHz)

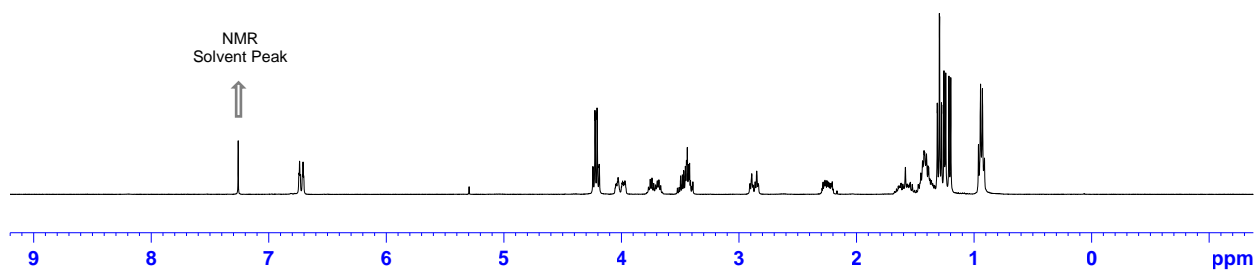

165.43  
165.39

137.32  
136.47

128.21

77.32  
77.00  
76.80  
76.68  
76.36  
76.20  
75.52  
67.67  
66.97  
61.17  
59.70  
59.27

39.23  
38.65  
30.26  
30.17  
20.67  
19.16  
18.67  
18.65  
14.17  
14.15  
14.10  
14.09

NMR Solvent Peaks

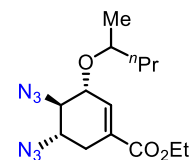

**54** *dr*: 1:1  
(CDCl<sub>3</sub>, 100 MHz)

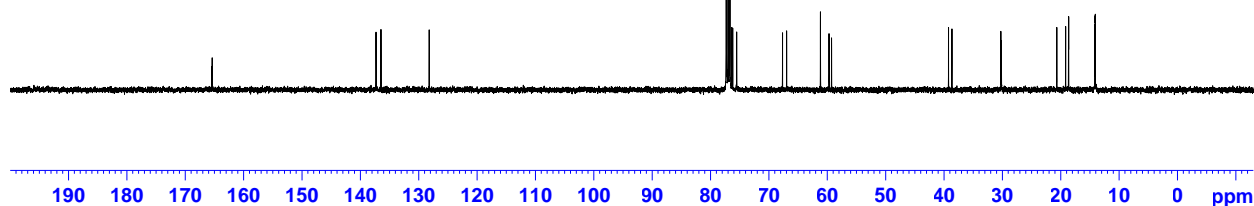

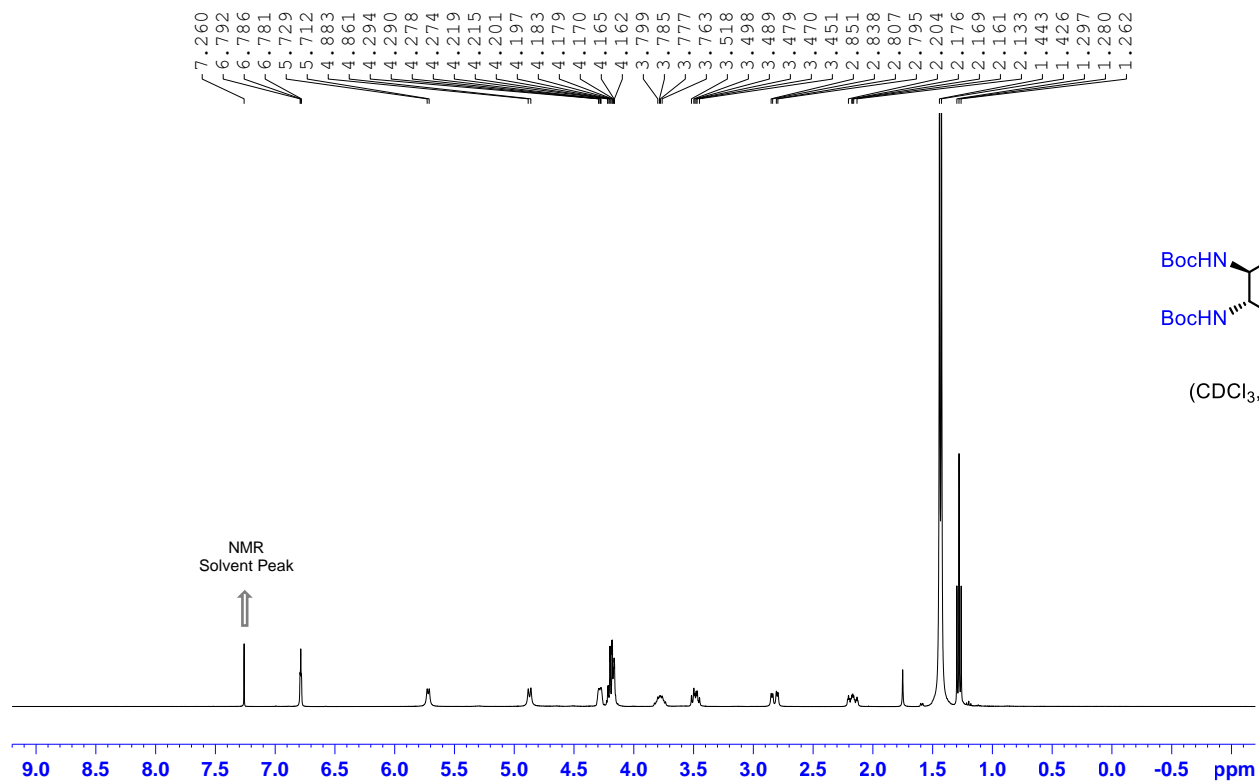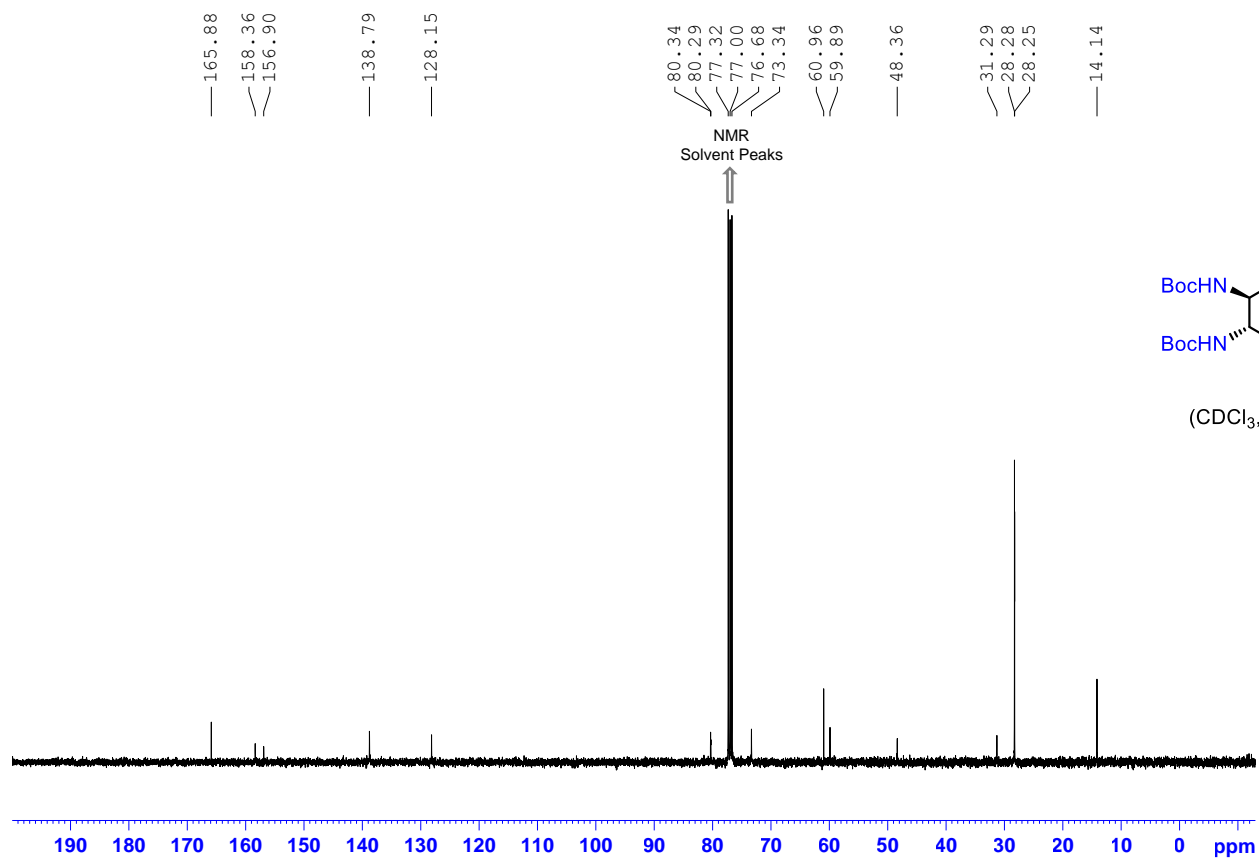

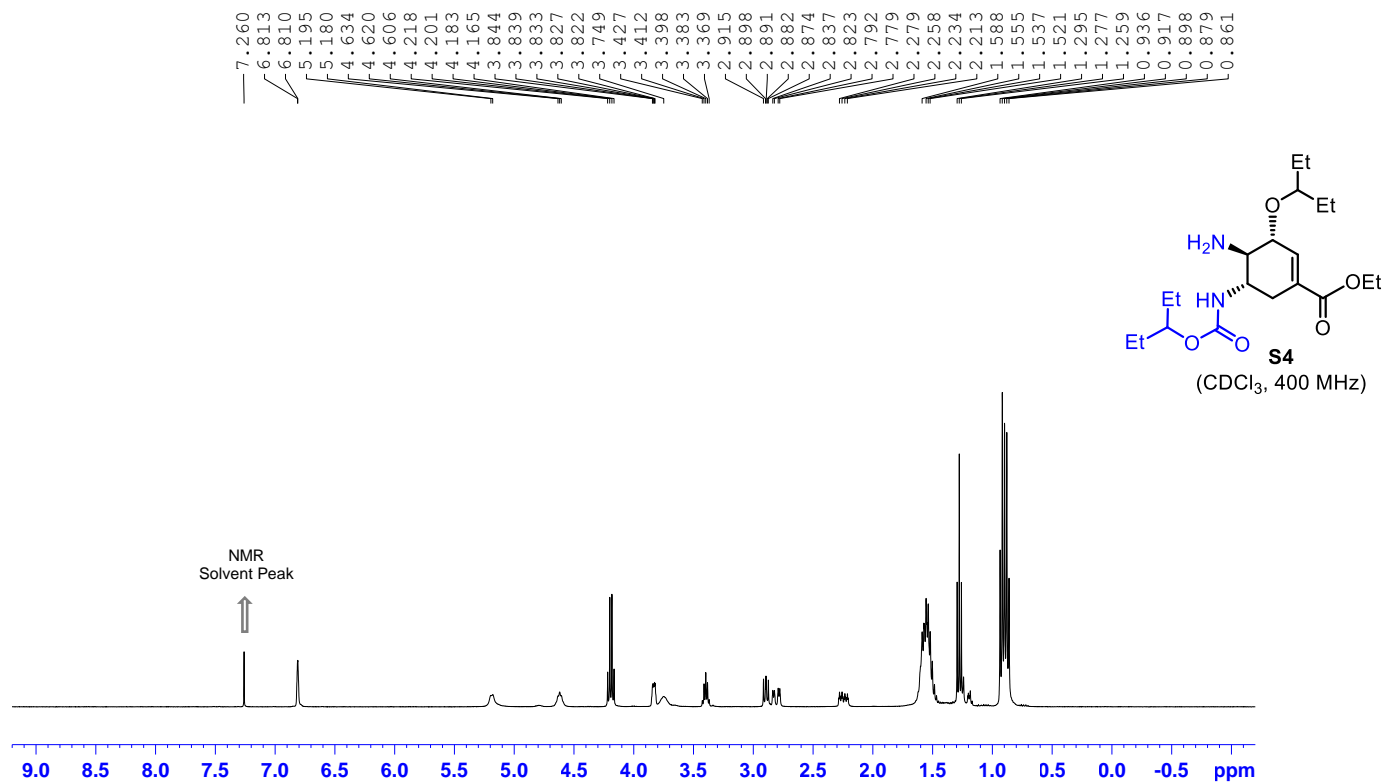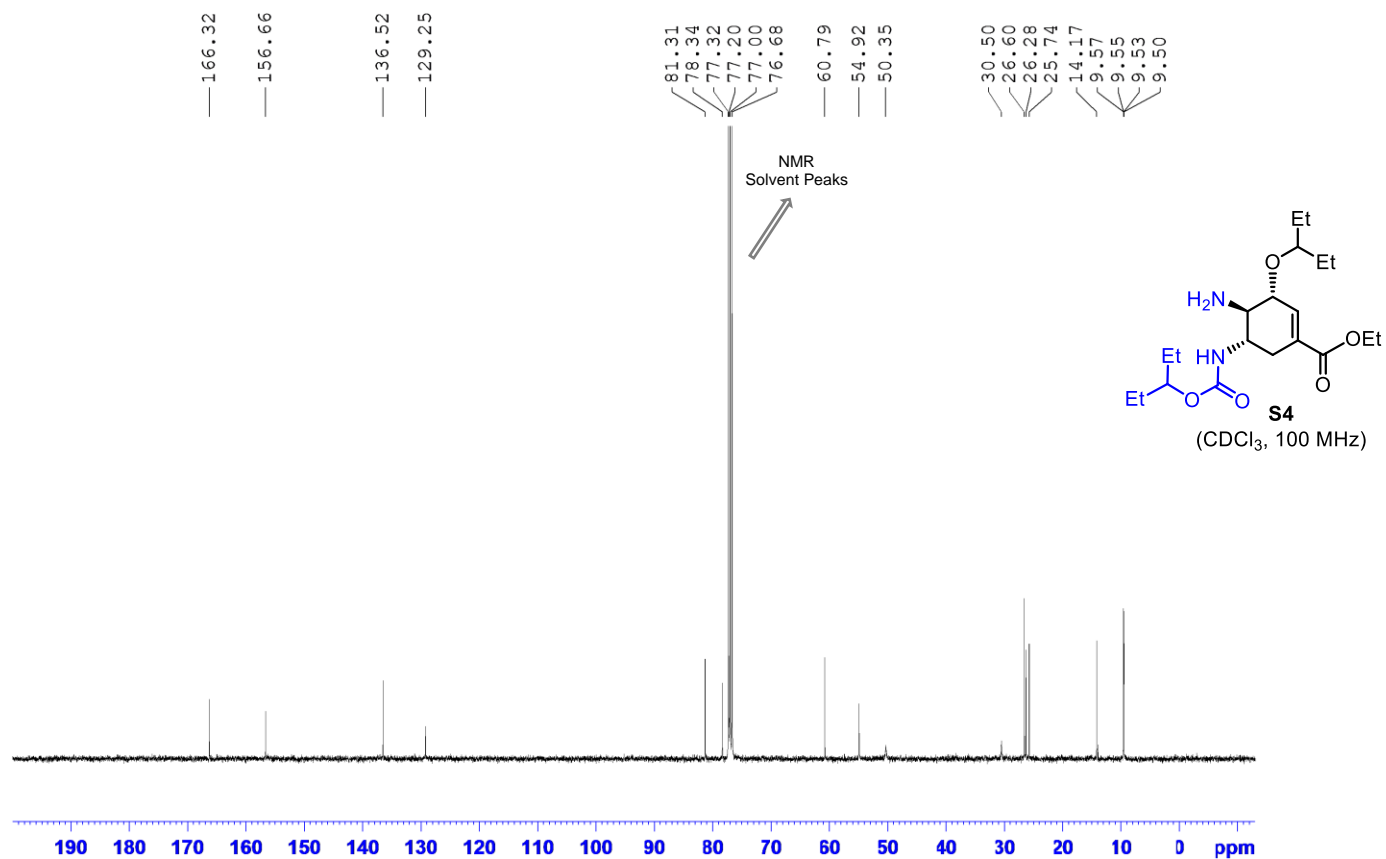

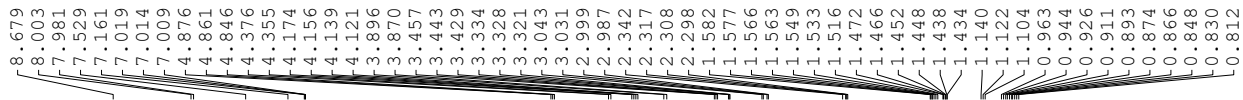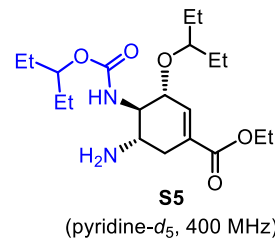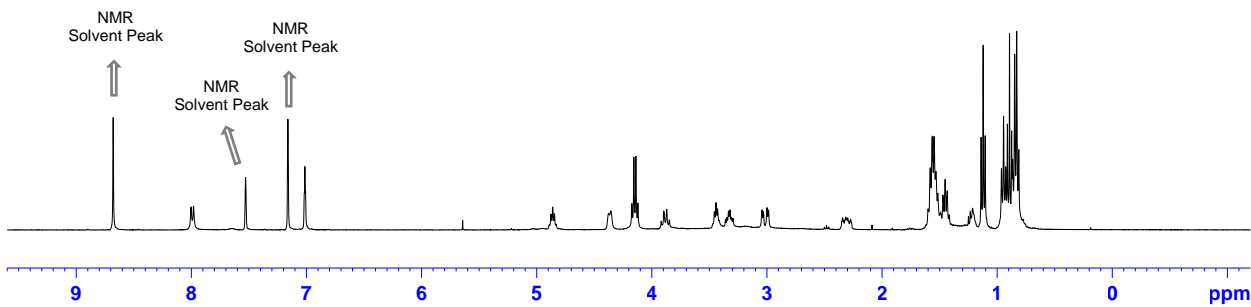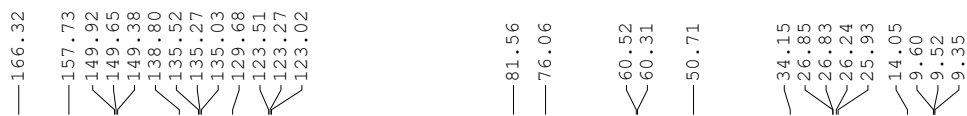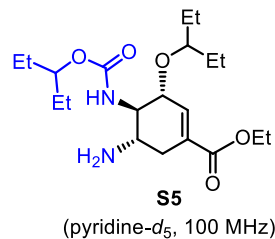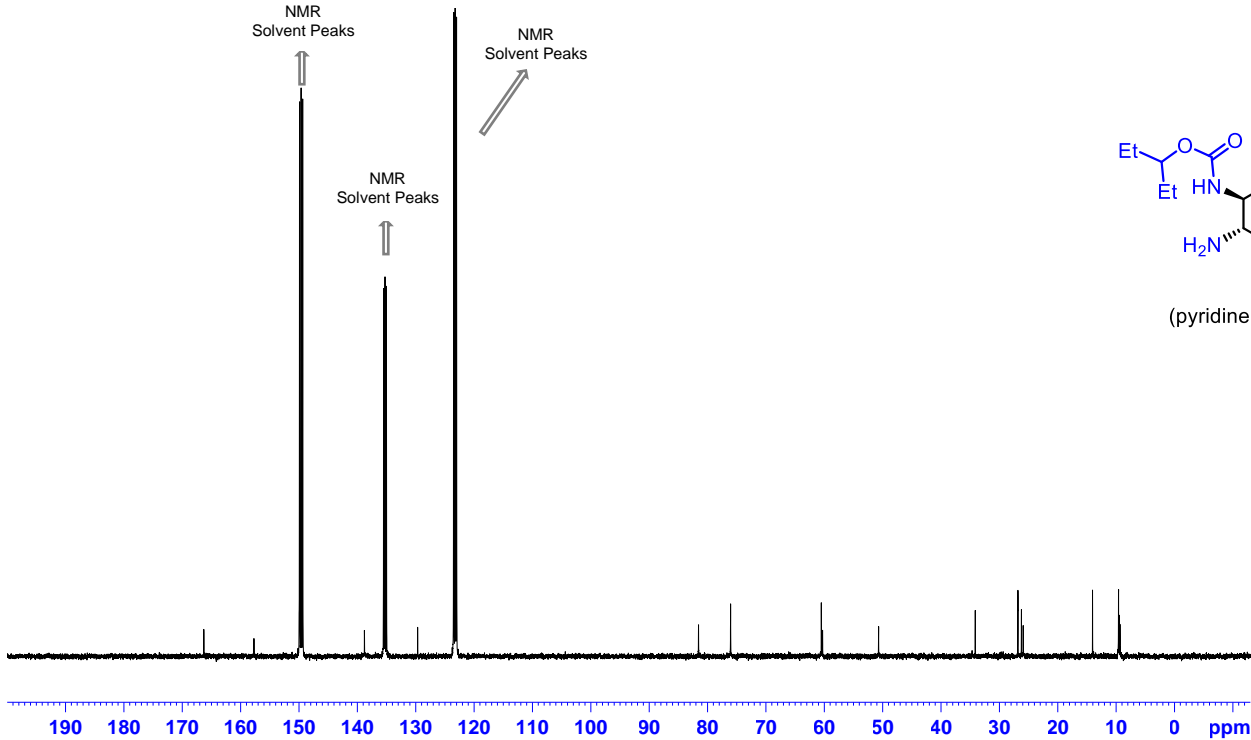

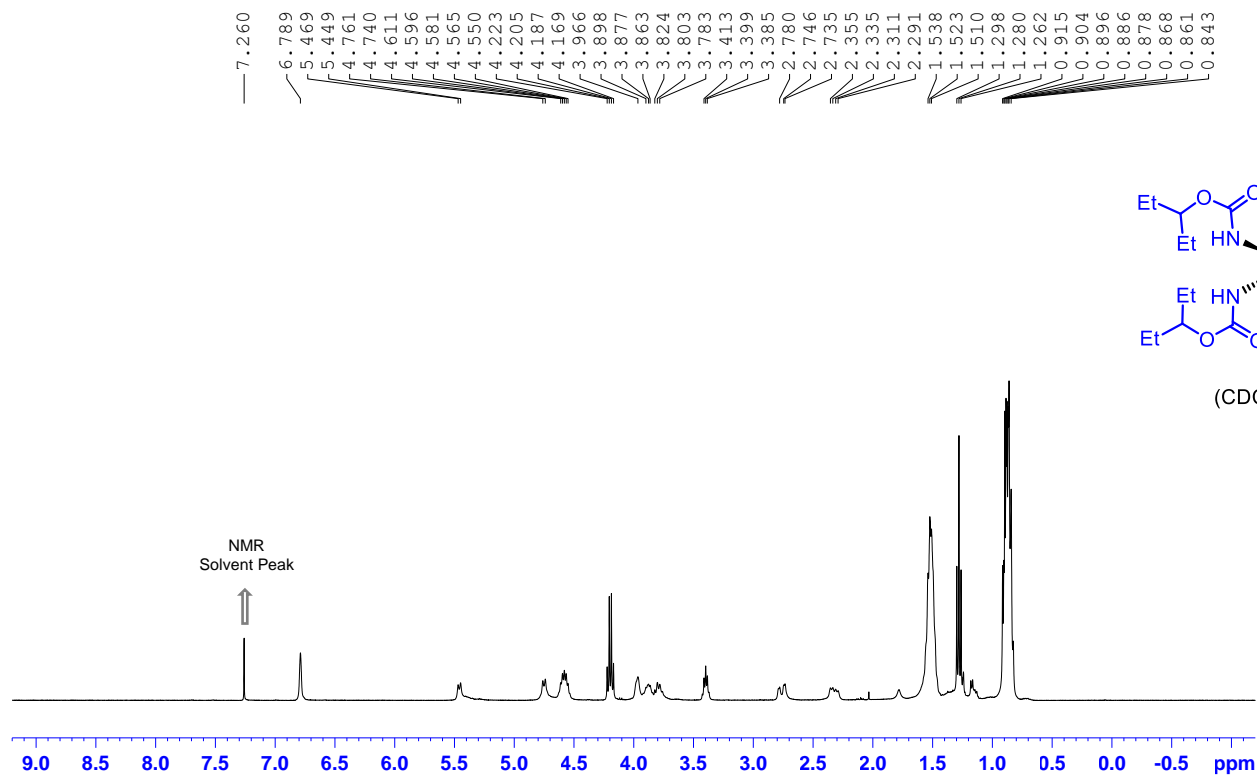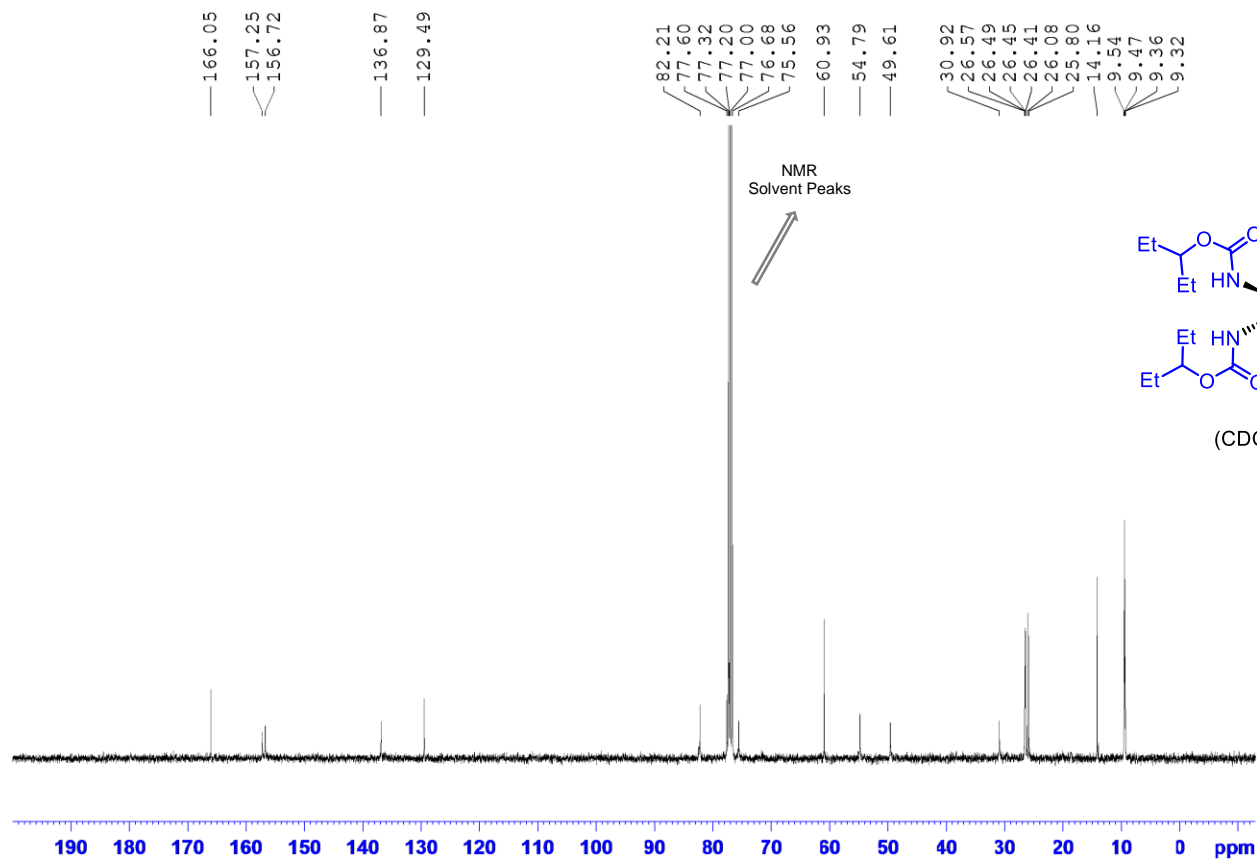

Supplement: NIHMS984951-supplement-SI.pdf [file NIHMS984951-supplement-SI.pdf]
